# Supplementary material for: First note of QTL mapping of low vigor traits using the updated F2 ‘Koroneiki’ linkage map of olive
Source: Front Plant Sci. 2025 Jan 31;16:1519402. doi: 10.3389/fpls.2025.1519402 (PMC11825337; doi:10.3389/fpls.2025.1519402)
Supplement: Supplementary Table S1 — Height and Basal diameter measurements of the ‘Koroneiki’ F2 Progeny. [file Table1.xlsx]

## Sheet: Sheet
Supplementary Table 1. Height and basal diameter measurement
Genotype	6 months		9 months		2 years old		3 years		12 years
	length of main axis (cm)	basal diameter (mm)	length of main axis (cm)	basal diameter (mm)	length of main axis (cm)	basal diameter (mm)	length of main axis (cm)	basal diameter (mm)	length of main axis (cm)	basal diameter (mm)
kxk 01	55	4.9	55	6.15	62	19	62	19	91	29
kxk 02	40	5.43	40	4.69	72	17	72	17	91	22
kxk03	31	4.68	31	2.99	58	15.5	58	15.5	105	26
kxk05	28	3.53	28	3.94	32	5	58	12	90	23
kxk06	42	3.14	44	3.99	117	17	152	27	360	64
kxk07	43	4	48	7.98	108	28	108	31	300	65
kxk08	29	3	29	3.46	69	15	140	25	180	25
kxk09	42	4	54	4.6	142	28.64	142	28.64	270	70
kxk10	31	5	40	7	52	15	81	15	180	42
kxk11	57	5	63	8.19	105	16	107	16.2	193	62
kxk12	20	3.5	20	3.82	62	10.6	62	13	151	39
kxk13	17	3	23	3.53	37	10	86	10	230	47
kxk14	20	2	26	2.25	67	14.8	101	16.5	250	60
kxk15	18	4	18	4.34	62	12.9	112	17	255	68
kxk16	27	2.36	28.5	3.45	60	12.5	128	25.5	300	62
kxk19	37	5	39	3.9	55	18.5	152	25.5	220	80
kxk20	17	3.88	20	3.33	130	24	135	24.4	310	83
kxk21	24.5	3.45	29	3.3	37	8.5	53.5	11	185	32
kxk22	9	1.9	9	3.35	27	9.3	48	9.3	112	15
kxk23	13.5	2.5	17	3.6	63	8.5	90	8.5	240	61
kxk24	33	3.5	36	5.39	64	18	233	48	335	74
kxk25	37	3.55	44	7.7	105	18	106	20.9	280	66
kxk26	33	4.17	46	6.83	108	21.6	150	33	290	71
kxk27	31.5	4.1	54	6.15	92	32.5	92	33	120	34
kxk33	51	4	58	7.21	80	17.8	135	17.8	215	52
kxk35	21	3	21	5.06	49	10.5	71	15	190	52
kxk36	10.5	2.2	15	4.98	23	5.7	23	6	56	20
kxk38	61	9	68	6.27	151	23.6	154	33.6	330	108
kxk41	44	4	47	7.73	82	12	84	13	210	82
kxk42	12	2.41	14	3.5	32	6.03	59	9.8	184	61
kxk43	48	5	56	4.3	58	12.9	120	22.9	250	51
kxk45	14	4	18	3.21	60	11.56	117	13	200	52
kxk49	72	10	72	4.03	150	15.6	157	19	320	73
kxk51	56	9	56	5.26	62	13.7	70	13.7	270	58
kxk62	34	4	35	2.79	54	19	79	19	260	70
kxk64	29	4	29	4	29	15	47	15	95	23
kxk66	18	3	20	2.65	53	10	53	11	180	42
kxk67	5	2	9	2.9	24	8.9	24	12.12	69	17
kxk68	13	3	13	3	22	4.1	22	6.8	64	18
kxk76	14	3	14	2.3	19.2	5.7	20	5.7	65	23
kxk82	35	3.8	36	4.2	61	21	61	21	170	51
kxk87	25	3	26	3.09	38	8.8	41	9.5	*	*
kxk91	49	4	51	5.6	51	20	117	20	195	51
kxk92	25	3	25	2.61	90	14.5	127	14.5	230	60
kxk95	15.5	2.7	17	3.45	30	10	41	10	44	21
kxk105	42	3.6	46	4.69	62	15	165	18.75	300	77
kxk117	17	2.5	22	3.41	61	13	92	13.64	250	72
kxk122	29	3	30	4.67	30	8.9	55	8.9	125	24
kxk126	17.5	2.6	18	3.34	68	14.56	116	18.16	*	*
kxk147	22	2.5	30.5	4.48	49	9	93	9	*	*
kxk148	10.5	2	14	3.1	42	7.6	46	8.6	100	20
kxk149	44	4	50	6	100	17.13	100	23	235	55
kxk155	16	2	17.5	3.38	29	10.1	72	13	180	45
kxk157	36	4	44	4.5	82	17	110	17	290	62
kxk163	35	4	35	4.25	97	13	97	13	225	60
kxk165	41.5	3.5	43.5	4.5	100	8.9	112	20	170	36
kxk170	10.5	1.1	18	3.8	64	9.3	64	14	150	42
kxk171	10	2.8	15	4.65	41	13	77	13	*	*
kxk184	22.5	3	23	4.25	61	8	63	8	165	38
kxk188	15.5	3	16	3.86	67	12	67	13	125	25
kxk213	7.5	4.8	8	5	24	5.77	30	7.1	74	19
kxk216	37	3.6	47	5.8	71	11.5	102	12	240	70
kxk218	37.5	3.4	42	6.2	71	11.5	82	14	195	45
kxk237	62	8	75	9.5	80	19	152	30.5	345	74
kxk240	67.5	6	73	7.93	123	18.2	125	21	245	66
kxk245	21	4.1	38	5.4	63	10.9	63	10.9	*	*
kxk246	21	2.4	21	3.2	21	5.26	22	5.29	74	18
kxk259	37	4.2	37	3.88	38	5	38	5	94	21
kxk263	27	3.3	27	3.7	40	8	105	11.6	260	70
kxk273	15.3	2.1	17	3.2	19	8.17	19	8.17	41	16
kxk288	19	2.7	21	5.4	51	8.8	91	14	160	38
kxk303	21	6	21	3.9	42	8.79	42	12	*	*
kxk304	14	3	22	5.66	38	8.27	62	13	180	44
kxk305	62	5	71	7	116	17	116	21	210	53
kxk312	69	7.5	74	7.2	74	20.5	92	24.6	214	45
kxk313	52	4.84	61	8	149	13.3	149	18.5	290	62
kxk316	16	2.6	17	4.2	76	11.5	124	14	250	57
kxk319	12	2	12	2.6	24	9	53	9	190	47
kxk323	37	3.6	41	5.5	78	13.3	162	13.4	265	51
kxk324	31	3.05	31	5.4	87	14	142	16	170	45
kxk325	28	3.5	32	5.75	32	9.3	39	15.5	77	19
Standard Koroneiki	-	-	-	-	-	-	150	20	-	-
