# Supplementary material for: First note of QTL mapping of low vigor traits using the updated F2 ‘Koroneiki’ linkage map of olive
Source: Front Plant Sci. 2025 Jan 31;16:1519402. doi: 10.3389/fpls.2025.1519402 (PMC11825337; doi:10.3389/fpls.2025.1519402)
Supplement: Supplementary Table S2 — Morphologic parameters of leaves, internodes and nodes measured. [file Table2.xlsx]

## Sheet: Sheet
Supplementary Table 2. Morphological parameters of leaves, internodes and nodes
Genotype	3rd year measurements										12th year measurements
	Leaf Area			H/L			Internode Length (main axis)			Nodes	Leaf Area			H/L			Internode Length (2 years old shoot)			Nodes			Branchlets Lenght
	cm2			Leaf			cm			n°	cm2			Leaf			cm			n°
Koroneiki	4,33	±	0,045	4,56	±	0,027	2.2	±	0,014	66.6667	4,27	±	0,023	4,66	±	0,015	2,25	±	0,013	16	±	0.02952	36	±	0.177778
kxk 01	1,44	±	0,029	2,42	±	0,017	1,38	±	0,032	44.9275	1,66	±	0,130	2,58	±	0,014	1.42259	±	0,013	16	±	0.019024	22.7615	±	0.177778
kxk 02	2,09	±	0,029	2,41	±	0,021	1,74	±	0,011	41.3793	2,29	±	0,023	3,43	±	0,021	1.10239	±	0,019	15	±	0.0135594	16.5358	±	0.166667
kxk03	1,42	±	0,026	2,17	±	0,013	1,03	±	0,009	56.3107	1,51	±	0,016	2,23	±	0,009	1,17	±	0,008	10.3528	±	0.018223	12.1127	±	0.115031
kxk05	0,96	±	0,035	2,86	±	0,015	1,27	±	0,008	45.6693	0,44	±	0,004	1,96	±	0,009	1.10239	±	0,008	18.6667	±	0.0156197	19.0484	±	0.207407
kxk06	1,09	±	0,034	2,83	±	0,019	1,57	±	0,008	96.8153	1,12	±	0,007	2,80	±	0,023	1.83586	±	0,021	20.6667	±	0.0461933	37.941	±	0.22963
kxk07	1,24	±	0,027	2,27	±	0,017	1,39	±	0,008	77.6978	1,29	±	0,014	2,64	±	0,009	1,04	±	0,008	19.0119	±	0.032779	19.7724	±	0.211243
kxk08	1,58	±	0,035	2,89	±	0,015	1,26	±	0,009	111.111	1,76	±	0,008	1,83	±	0,013	1.10239	±	0,011	14.3333	±	0.0158983	19.3882	±	0.159259
kxk09	2,45	±	0,025	2,10	±	0,019	1,56	±	0,009	91.0256	3,43	±	0,020	4,51	±	0,025	1,90	±	0,022	13.5308	±	0.0235652	25.7085	±	0.150342
kxk10	2,14	±	0,032	2,67	±	0,019	1,55	±	0,011	52.2581	2,43	±	0,023	3,80	±	0,013	1,48	±	0,012	14.1376	±	0.0245852	20.9236	±	0.157084
kxk11	2,00	±	0,024	1,97	±	0,020	1,63	±	0,009	65.6442	2,02	±	0,023	2,57	±	0,016	1,38	±	0,014	12.1506	±	0.0212452	16.7679	±	0.135007
kxk12	1,69	±	0,039	3,19	±	0,017	1,43	±	0,011	43.3566	1,74	±	0,017	2,80	±	0,010	1,32	±	0,009	11.9621	±	0.0209283	15.79	±	0.132912
kxk13	1,20	±	0,023	1,86	±	0,011	0,94	±	0,008	91.4894	1,31	±	0,016	2,06	±	0,022	1,03	±	0,020	17.3333	±	0.0315153	17.8533	±	0.192593
kxk14	1,32	±	0,027	2,20	±	0,015	1,25	±	0,010	80.8	1,42	±	0,021	2,40	±	0,019	1,39	±	0,017	16.6508	±	0.0288099	23.1446	±	0.185008
kxk15	1,44	±	0,031	2,55	±	0,015	1,20	±	0,010	93.3333	2,01	±	0,019	3,88	±	0,021	1,39	±	0,019	15.6099	±	0.0270603	21.6978	±	0.173443
kxk16	2,46	±	0,038	3,12	±	0,017	1,42	±	0,016	90.1408	3,70	±	0,044	3,45	±	0,015	1,93	±	0,013	20.3333	±	0.0246	39.2433	±	0.225926
kxk19	0,87	±	0,025	2,09	±	0,017	1,37	±	0,009	110.949	2,14	±	0,017	4,00	±	0,016	1,48	±	0,015	10.3333	±	0.01271	15.2933	±	0.114815
kxk20	2,96	±	0,028	2,29	±	0,016	1,32	±	0,011	102.273	2,00	±	0,025	2,50	±	0,011	1,89	±	0,010	16.3032	±	0.0282256	30.813	±	0.181146
kxk21	1,46	±	0,041	3,41	±	0,015	1,23	±	0,011	43.4959	1,43	±	0,012	3,86	±	0,012	1,04	±	0,011	17.2412	±	0.0298025	17.9309	±	0.191569
kxk22	3,13	±	0,040	3,34	±	0,023	1,94	±	0,019	24.7423	4,66	±	0,055	3,88	±	0,019	2,44	±	0,017	7.73963	±	0.0138303	18.8847	±	0.0859959
kxk23	1,08	±	0,036	2,99	±	0,014	1,13	±	0,009	79.646	1,13	±	0,009	3,10	±	0,014	1,31	±	0,013	13	±	0.0199533	17.03	±	0.144444
kxk24	2,68	±	0,026	2,15	±	0,021	1,74	±	0,007	133.908	3,09	±	0,009	2,86	±	0,009	1,95	±	0,008	16.6667	±	0.0292467	32.5	±	0.185185
kxk25	1,80	±	0,028	2,33	±	0,021	1,76	±	0,009	60.2273	1,84	±	0,018	3,39	±	0,013	1,33	±	0,012	24	±	0.0439247	31.92	±	0.266667
kxk26	3,41	±	0,029	2,38	±	0,025	2,06	±	0,018	72.8155	4,60	±	0,061	2,87	±	0,016	2,93	±	0,014	6.33333	±	0.02132	18.5567	±	0.0703704
kxk27	2,19	±	0,025	2,07	±	0,017	1,37	±	0,007	67.1533	1,15	±	0,009	2,36	±	0,010	0,87	±	0,009	5.66667	±	0.00546667	4.93	±	0.062963
kxk33	1,22	±	0,028	2,30	±	0,020	1,65	±	0,009	81.8182	1,36	±	0,018	3,48	±	0,017	1,95	±	0,016	21	±	0.033784	40.95	±	0.233333
kxk35	1,66	±	0,031	2,53	±	0,015	1,27	±	0,010	55.9055	1,71	±	0,020	2,68	±	0,014	1,34	±	0,013	13.6667	±	0.0285998	18.3133	±	0.151852
kxk36	1,13	±	0,034	2,84	±	0,014	1,19	±	0,010	19.3277	1,45	±	0,013	2,90	±	0,021	1,63	±	0,019	7.3915	±	0.0132451	12.0482	±	0.0821278
kxk38	1,39	±	0,047	3,92	±	0,012	0,96	±	0,011	160.417	1,49	±	0,009	4,12	±	0,013	1,06	±	0,012	8.33333	±	0.0174933	8.83333	±	0.0925926
kxk41	1,56	±	0,037	3,04	±	0,020	1,63	±	0,010	51.5337	1,76	±	0,012	3,33	±	0,022	1,67	±	0,020	12.3333	±	0.01476	20.5967	±	0.137037
kxk42	0,71	±	0,034	2,82	±	0,007	0,55	±	0,012	107.273	2,59	±	0,026	3,34	±	0,016	1,65	±	0,014	18.2881	±	0.0315622	30.1753	±	0.203201
kxk43	1,82	±	0,034	2,78	±	0,019	1,60	±	0,013	75	3,01	±	0,031	3,88	±	0,017	2.32	±	0,016	15.4109	±	0.0267257	35.7532	±	0.171232
kxk45	1,56	±	0,044	3,62	±	0,014	1,15	±	0,011	101.739	1,75	±	0,009	3,93	±	0,024	1,26	±	0,022	16	±	0.0221267	20.16	±	0.177778
kxk49	1,56	±	0,032	2,64	±	0,022	1,80	±	0,009	87.2222	1,95	±	0,015	2,88	±	0,016	1,26	±	0,014	11.3333	±	0.01722	14.28	±	0.125926
kxk51	3,07	±	0,058	4,76	±	0,017	1,43	±	0,020	48.951	3,92	±	0,040	4,52	±	0,030	1,98	±	0,027	23.0808	±	0	45.7	±	0.19
kxk62	1,07	±	0,025	2,03	±	0,011	0,89	±	0,007	88.764	1,08	±	0,010	2,73	±	0,011	1.88834	±	0,010	23.6667	±	0.036326	44.6908	±	0.262963
kxk64	1,40	±	0,034	2,79	±	0,014	1,16	±	0,009	40.5172	1,41	±	0,011	2,83	±	0,021	1,29	±	0,019	10.7787	±	0.018939	13.9045	±	0.119764
kxk66	1,02	±	0,035	2,92	±	0,012	1,00	±	0,009	53	1,13	±	0,009	2,98	±	0,018	1,29	±	0,016	16.3333	±	0.0310507	21.07	±	0.181481
kxk67	0,96	±	0,030	2,50	±	0,008	0,63	±	0,008	38.0952	1,05	±	0,011	2,62	±	0,015	1,58	±	0,014	7.48477	±	0.0134019	11.8259	±	0.0831641
kxk68	2,71	±	0,040	3,28	±	0,010	0,80	±	0,011	27.5	2,16	±	0,016	3,34	±	0,012	1,85	±	0,011	9.56098	±	0.016892	17.6878	±	0.106233
kxk76	1,24	±	0,030	2,45	±	0,010	0,82	±	0,007	24.3902	1,23	±	0,007	3,16	±	0,011	0,85	±	0,010	7.64228	±	0.0136667	6.49593	±	0.0849142
kxk82	2,48	±	0,039	3,23	±	0,019	1,60	±	0,015	38.125	3,43	±	0,035	4,55	±	0,033	1,86	±	0,030	11.0569	±	0.0194067	20.5659	±	0.122855
kxk87	0,70	±	0,034	2,82	±	0,012	0,96	±	0,026	42.7083
kxk91	2,21	±	0,048	3,93	±	0,015	1,23	±	0,017	95.122	2,53	±	0,039	2,96	±	0,021	1,64	±	0,019	21.6667	±	0.0353147	35.5333	±	0.240741
kxk92	2,05	±	0,039	3,26	±	0,018	1,45	±	0,011	87.5862	2,07	±	0,017	2,34	±	0,006	1,24	±	0,005	22.3333	±	0.0356153	27.6933	±	0.248148
kxk95	1,11	±	0,039	3,21	±	0,014	1,19	±	0,011	34.4538	1,31	±	0,016	3,33	±	0,024	1,34	±	0,022	6.90732	±	0.0090692	9.2558	±	0.076748
kxk105	1,32	±	0,037	3,03	±	0,010	0,86	±	0,010	191.86	2,02	±	0,011	3,14	±	0,013	1,98	±	0,012	20.3333	±	0.0329367	40.26	±	0.225926
kxk117	1,09	±	0,029	2,38	±	0,008	0,69	±	0,007	133.333	1,09	±	0,008	2,54	±	0,007	0,88	±	0,006	15	±	0.0309892	13.2	±	0.166667
kxk122	1,14	±	0,037	3,09	±	0,016	1,30	±	0,010	42.3077	1,36	±	0,011	3,21	±	0,021	1,39	±	0,019	8.01186	±	0.0142879	11.1365	±	0.0890206
kxk126	1,48	±	0,050	4,10	±	0,012	0,99	±	0,012	117.172
kxk147	1,40	±	0,032	2,60	±	0,014	1,12	±	0,009	83.0357
kxk148	0,60	±	0,032	2,68	±	0,012	1,02	±	0,008	45.098	0,60	±	0,005	2,64	±	0,013	1,17	±	0,012	6.65615	±	0.012009	7.7877	±	0.0739572
kxk149	2,01	±	0,040	3,31	±	0,015	1,26	±	0,013	79.3651	2,02	±	0,023	2,57	±	0,016	1,28	±	0,014	16	±	0.0367633	20.48	±	0.177778
kxk155	0,90	±	0,033	2,74	±	0,011	0,91	±	0,008	79.1209	1,01	±	0,006	3,01	±	0,011	1,04	±	0,016	15.4674	±	0.0268208	16.0861	±	0.17186
kxk157	1,08	±	0,035	2,93	±	0,007	0,56	±	0,009	196.429	1,95	±	0,010	3,32	±	0,015	1,83	±	0,013	17.6667	±	0.04182	32.33	±	0.196296
kxk163	1,80	±	0,042	3,47	±	0,016	1,35	±	0,011	71.8519	1,84	±	0,013	2,40	±	0,009	1,90	±	0,008	18.3614	±	0.0316855	34.8867	±	0.204015
kxk165	1,27	±	0,026	2,19	±	0,016	1,28	±	0,008	87.5	1,31	±	0,013	3,59	±	0,018	1,25	±	0,016	14.3333	±	0.0150333	17.9167	±	0.159259
kxk170	0,91	±	0,032	2,61	±	0,015	1,24	±	0,008	51.6129	1,03	±	0,007	2,91	±	0,013	1,49	±	0,012	11.3333	±	0.024316	16.8867	±	0.125926
kxk171	0,66	±	0,042	3,48	±	0,009	0,78	±	0,009	98.7179
kxk184	1,68	±	0,025	2,03	±	0,014	1,19	±	0,008	52.9412	1,74	±	0,017	2,80	±	0,010	1,25	±	0,009	17.3333	±	0.0272787	21.6667	±	0.192593
kxk188	2,29	±	0,043	3,59	±	0,018	1,48	±	0,013	45.2703	2,62	±	0,020	3,53	±	0,012	1,74	±	0,011	16.6667	±	0.0256933	29	±	0.185185
kxk213	1,19	±	0,024	2,02	±	0,013	1,11	±	0,007	27.027	1,23	±	0,009	2,60	±	0,014	1,09	±	0,013	18.3333	±	0.0379113	19.9833	±	0.203704
kxk216	1,20	±	0,029	2,42	±	0,014	1,18	±	0,010	86.4407	1,22	±	0,019	4,04	±	0,025	1,44	±	0,023	14	±	0.027552	20.16	±	0.155556
kxk218	2,65	±	0,045	3,72	±	0,017	1,39	±	0,017	58.9928	3,87	±	0,038	4,20	±	0,026	1,95	±	0,023	15	±	0.01845	29.25	±	0.166667
kxk237	2,81	±	0,037	3,09	±	0,014	1,19	±	0,012	127.731	2,84	±	0,022	3,15	±	0,010	1,49	±	0,009	33.6667	±	0.0562247	50.1633	±	0.374074
kxk240	0,93	±	0,029	2,39	±	0,013	1,11	±	0,007	112.613	1,10	±	0,008	2,80	±	0,020	1,41	±	0,018	23.3333	±	0.03526	32.9	±	0.259259
kxk245	1,21	±	0,039	3,20	±	0,023	1,93	±	0,011	32.6425															0
kxk246	2,37	±	0,042	3,47	±	0,011	0,88	±	0,017	25	3,11	±	0,044	4,07	±	0,023	1,87	±	0,021	7.33333	±	0.0136667	13.7133	±	0.0814815
kxk259	1,46	±	0,041	3,38	±	0,013	1,05	±	0,011	36.1905	1,56	±	0,012	3,46	±	0,014	1,18	±	0,013	15.6667	±	0.016892	18.4867	±	0.174074
kxk263	1,25	±	0,037	3,02	±	0,014	1,17	±	0,009	89.7436	1,82	±	0,010	3,01	±	0,009	1,44	±	0,008	22.3333	±	0.0451	32.16	±	0.248148
kxk273	0,60	±	0,031	2,53	±	0,014	1,13	±	0,007	16.8142	0,68	±	0,006	2,38	±	0,007	1,30	±	0,006	9.33333	±	0.0120267	12.1333	±	0.103704
kxk288	1,66	±	0,027	2,20	±	0,010	0,86	±	0,010	105.814	1,94	±	0,025	2,60	±	0,009	1,44	±	0,008	17.6667	±	0.025584	25.44	±	0.196296
kxk303	2,10	±	0,033	2,72	±	0,009	0,71	±	0,012	59.1549															0
kxk304	0,98	±	0,040	3,34	±	0,016	1,31	±	0,012	47.3282	1,54	±	0,020	3,04	±	0,016	1,80	±	0,014	12.6667	±	0.0195433	22.8	±	0.140741
kxk305	0,89	±	0,031	2,52	±	0,009	0,78	±	0,011	148.718	2,74	±	0,026	4,14	±	0,014	1,35	±	0,013	16.6667	±	0.0195433	22.5	±	0.185185
kxk312	2,56	±	0,032	2,63	±	0,019	1,61	±	0,011	57.1429	3,86	±	0,024	3,65	±	0,018	1,98	±	0,017	14.3333	±	0.0326907	28.38	±	0.159259
kxk313	2,53	±	0,029	2,41	±	0,019	1,57	±	0,014	94.9045	3,75	±	0,042	4,85	±	0,036	1,95	±	0,033	17.3333	±	0.0406173	33.8	±	0.192593
kxk316	1,58	±	0,026	2,15	±	0,020	1,68	±	0,006	73.8095	1,67	±	0,006	3,08	±	0,015	1,24	±	0,014	16.6667	±	0.0187233	20.6667	±	0.185185
kxk319	2,17	±	0,036	2,96	±	0,023	1,93	±	0,010	27.4611	2,53	±	0,014	2,55	±	0,016	1,43	±	0,014	22.6667	±	0.0300667	32.4133	±	0.251852
kxk323	2,14	±	0,027	2,26	±	0,017	1,42	±	0,011	114.085	2,85	±	0,028	3,50	±	0,016	1,42	±	0,014	24	±	0.0251467	34.08	±	0.266667
kxk324	1,05	±	0,030	2,52	±	0,016	1,35	±	0,010	105.185	1,10	±	0,017	2,82	±	0,018	1,35	±	0,016	15	±	0.0161267	20.25	±	0.166667
kxk325	1,99	±	0,040	3,29	±	0,017	1,41	±	0,012	27.6596	2,13	±	0,020	2,60	±	0,012	1,35	±	0,011	10	±	0.00956667	13.5	±	0.111111
