# Supplementary material for: First note of QTL mapping of low vigor traits using the updated F2 ‘Koroneiki’ linkage map of olive
Source: Front Plant Sci. 2025 Jan 31;16:1519402. doi: 10.3389/fpls.2025.1519402 (PMC11825337; doi:10.3389/fpls.2025.1519402)
Supplement: Supplementary Table S3 — Fruits morphologic parameters. [file Table3.xlsx]

## Sheet: Sheet
Suppementary Table 3. Fruits parameters
Genotype	Drupe Weight (g)	Pit Weight (g)	Pulp Weight (g)	Pulp/Pit Ratio	Drupe Lenght (mm)	Drupe Diameter (mm)	Drupe Lenght/Diameter Ratio
KxK 49	3.24 a	0.59 a	2.65 a	4.54 ab	17.68 a	16.30 a	1.10 d
KxK 38	1.66 b	0.32 b	1.34 b	4.24 abc	16.45 b	12.42 b	1.32 c
Koroneiki	1.37 bc	0.24 c	1.13 b	4.77 a	16.87 ab	11.54 c	1.46 a
KxK 237	1.30 c	0.26 bc	1.04 bc	4.01 bc	14.55 c	11.12 c	1.31 c
KxK 19	1.28 c	0.27 bc	1.01 c	3.85 cd	15.98 b	11.19 c	1.42 ab
KxK 24	0.73 d	0.17 d	0.56 d	3.42 d	12.99 d	9.38 d	1.38 b
