# Supplementary material for: First note of QTL mapping of low vigor traits using the updated F2 ‘Koroneiki’ linkage map of olive
Source: Front Plant Sci. 2025 Jan 31;16:1519402. doi: 10.3389/fpls.2025.1519402 (PMC11825337; doi:10.3389/fpls.2025.1519402)
Supplement: Supplementary Table S4 — BLAST Analysis of SNPs in 23 Linkage Groups of 'Koroneiki' F2 Progeny Compared with the Olive Genomes of the cv. Picual and sylvestris. [file Table4.xlsx]

## Sheet: All_LinkageAnnotation
Supplementary Table 4: BLAST Analysis of SNPs in 23 Linkage Groups of Koroneiki F2 Progeny Compared with the Olive Genomes of the cv. Picual and sylvestris
LinkageGroup_Locus	Sylvestris ID	Picual ID	Atha_gene	Atha_description	swp_term	swp_description	InterPro	InterPro description
G1_137387	LOC111401492	Oleur061Scf2349g04019	AT1G72300.1	Leucine-rich receptor-like protein kinase family protein	Q5KQN0	Vacuolar cation/proton exchanger 2	IPR001611::IPR003591::IPR004713::IPR011009::IPR013210::IPR013320::IPR019825::IPR032675	Leucine-rich repeat::Leucine-rich repeat, typical subtype::Calcium/proton exchanger::Protein kinase-like domain::Leucine-rich repeat-containing N-terminal, plant-type::Concanavalin A-like lectin/glucanase domain::Legume lectin, beta chain, Mn/Ca-binding site::Leucine-rich repeat domain, L domain-like
G1_67893	LOC111400394	Oleur061Scf4490g00004	AT2G26710.1	Cytochrome P450 superfamily protein	O48786	Cytochrome P450 734A1	IPR001128	Cytochrome P450
G1_10640	LOC111388223	Oleur061Scf1510g04020	AT4G10380.1	NOD26-like intrinsic protein 5;1	Q9ATN1	Aquaporin NIP3-1	IPR000425::IPR023271	Major intrinsic protein::Aquaporin-like
G1_91107	LOC111401454	Oleur061Scf0543g08005				Unknown protein
G1_114017	LOC111401454	Oleur061Scf1719g03007				Unknown protein
G1_26368	LOC111401402	Oleur061Scf2269g04007	AT2G18350.1	homeobox protein 24	Q9ZPW7	Zinc-finger homeodomain protein 6	IPR006456::IPR009057	ZF-HD homeobox protein, Cys/His-rich dimerisation domain::Homeobox domain-like
G1_20830	LOC111401397	Oleur061Scf0343g01001	AT5G49980.1	auxin F-box protein 5	Q9LTX2	Transport inhibitor response 1-like protein	IPR006553::IPR032675	Leucine-rich repeat, cysteine-containing subtype::Leucine-rich repeat domain, L domain-like
G1_81080	LOC111388223	Oleur061Scf1510g04020	AT4G10380.1	NOD26-like intrinsic protein 5;1	Q9ATN1	Aquaporin NIP3-1	IPR000425::IPR023271	Major intrinsic protein::Aquaporin-like
G1_115736	LOC111401397	Oleur061Scf0343g01001	AT5G49980.1	auxin F-box protein 5	Q9LTX2	Transport inhibitor response 1-like protein	IPR006553::IPR032675	Leucine-rich repeat, cysteine-containing subtype::Leucine-rich repeat domain, L domain-like
G1_21732	LOC111401366	Oleur061Scf0820g01010	AT1G14170.3	RNA-binding KH domain-containing protein	F4KDN0	KH domain-containing protein HEN4	IPR004087	K Homology domain
G1_24899	LOC111401366	Oleur061Scf6854g04001	AT1G51580.1	RNA-binding KH domain-containing protein	Q5E9A3	Poly(rC)-binding protein 1	IPR004087	K Homology domain
G1_145461	LOC111388184	Oleur061Scf0023g06003	AT4G39220.1	Rer1 family protein	Q9CQU3	Protein RER1	IPR004932	Retrieval of early ER protein Rer1
G1_43735	LOC111374225	Oleur061Scf4089g01011	AT5G44250.1	Protein of unknown function DUF829, transmembrane 53		Unknown protein	IPR008547::IPR029058	Protein of unknown function DUF829, TMEM53::Alpha/Beta hydrolase fold
G1_17125	LOC111403998	Oleur061Scf2022g00001	AT5G06350.1	ARM repeat superfamily protein		Unknown protein
G1_22826	LOC111401304	Oleur061Scf0280g01002	AT1G06060.1	LisH and RanBPM domains containing protein	Q5ZKQ7	Glucose-induced degradation protein 8 homolog	IPR006594::IPR006595::IPR013144::IPR024964	LIS1 homology motif::CTLH, C-terminal LisH motif::CRA domain::CTLH/CRA C-terminal to LisH motif domain
G1_25080	LOC111375275	Oleur061Scf4684g01001	AT1G66080.1		Q9DD02	Protein Hikeshi	IPR008493::IPR031318	Domain of unknown function DUF775::OPI10 family
G1_153465	LOC111401201	Oleur061Scf3011g00005	AT5G37510.2	NADH-ubiquinone dehydrogenase, mitochondrial, putative	Q91VD9	NADH-ubiquinone oxidoreductase 75 kDa subunit, mitochondrial	IPR010228::IPR012675::IPR015405	NADH:ubiquinone oxidoreductase, subunit G::Beta-grasp domain::NADH-quinone oxidoreductase, chain G, C-terminal
G1_118265	LOC111401201	Oleur061Scf3011g00005	AT5G37510.2	NADH-ubiquinone dehydrogenase, mitochondrial, putative	Q91VD9	NADH-ubiquinone oxidoreductase 75 kDa subunit, mitochondrial	IPR010228::IPR012675::IPR015405	NADH:ubiquinone oxidoreductase, subunit G::Beta-grasp domain::NADH-quinone oxidoreductase, chain G, C-terminal
G1_16774	LOC111401174	Oleur061Scf8555g01028	AT5G10510.3	AINTEGUMENTA-like 6	Q52QU2	AP2-like ethylene-responsive transcription factor AIL6	IPR016177::IPR031112	DNA-binding domain::AP2-like ethylene-responsive transcription factor
G1_142953	LOC111401175	Oleur061Scf7233g00008	AT5G65500.1	U-box domain-containing protein kinase family protein	Q8GUH1	U-box domain-containing protein 33	IPR011009::IPR013083	Protein kinase-like domain::Zinc finger, RING/FYVE/PHD-type
G1_113417	LOC111401103	Oleur061Scf0780g00030	AT5G09230.7	sirtuin 2	Q94AQ6	NAD-dependent protein deacylase SRT2	IPR003000::IPR026591::IPR029035	Sirtuin family::Sirtuin family, catalytic core small domain::DHS-like NAD/FAD-binding domain
G1_25048	LOC111380425	Oleur061Scf2439g03022	AT2G37050.3	Leucine-rich repeat protein kinase family protein	Q8LKZ1	Nodulation receptor kinase	IPR011009::IPR013320::IPR032675	Protein kinase-like domain::Concanavalin A-like lectin/glucanase domain::Leucine-rich repeat domain, L domain-like
G1_65837	LOC111380423
G1_25517	LOC111380425	Oleur061Scf2439g03022	AT2G37050.3	Leucine-rich repeat protein kinase family protein	Q8LKZ1	Nodulation receptor kinase	IPR011009::IPR013320::IPR032675	Protein kinase-like domain::Concanavalin A-like lectin/glucanase domain::Leucine-rich repeat domain, L domain-like
G1_78539	LOC111388651	Oleur061Scf5388g00003	AT1G66680.1	S-adenosyl-L-methionine-dependent methyltransferases superfamily protein	Q5JPI9	Protein-lysine N-methyltransferase METTL10	IPR026635::IPR029063	Protein-lysine N-methyltransferase Efm4::S-adenosyl-L-methionine-dependent methyltransferase
G1_60685	LOC111402134	Oleur061Scf5894g00025	AT5G67460.1	O-Glycosyl hydrolases family 17 protein	O65399	Glucan endo-1,3-beta-glucosidase 1	IPR000490::IPR012946::IPR017853	Glycoside hydrolase family 17::X8 domain::Glycoside hydrolase superfamily
G1_116981	LOC111401026	Oleur061Scf8237g00003	AT5G65770.2	little nuclei4	Q9FLH0	Protein CROWDED NUCLEI 4
G1_59850	LOC111402143	Oleur061Scf3782g00021	AT4G37670.2	N-acetyl-l-glutamate synthase 2	Q7MIA6	Amino-acid acetyltransferase	IPR010167::IPR016181	Amino-acid N-acetyltransferase::Acyl-CoA N-acyltransferase
G1_81516	LOC111401032	Oleur061Scf0822g01023	AT5G17380.1	Thiamine pyrophosphate dependent pyruvate decarboxylase family protein	Q9LF46	2-hydroxyacyl-CoA lyase	IPR011766::IPR012001::IPR029035::IPR029061	Thiamine pyrophosphate enzyme, C-terminal TPP-binding::Thiamine pyrophosphate enzyme, N-terminal TPP-binding domain::DHS-like NAD/FAD-binding domain::Thiamin diphosphate-binding fold
G1_94368	LOC111410350	Oleur061Scf7915g02017	AT3G50530.2	CDPK-related kinase	P53681	CDPK-related protein kinase	IPR011009::IPR011992	Protein kinase-like domain::EF-hand domain pair
G1_32436	LOC111410350	Oleur061Scf7915g02017	AT3G50530.2	CDPK-related kinase	P53681	CDPK-related protein kinase	IPR011009::IPR011992	Protein kinase-like domain::EF-hand domain pair
G1_56124	LOC111400939	Oleur061Scf3725g02005	AT5G15790.1	RING/U-box superfamily protein	Q8LE94	E3 ubiquitin-protein ligase At3g02290	IPR013083	Zinc finger, RING/FYVE/PHD-type
G1_118914	LOC111400178	Oleur061Scf6827g00020	AT5G38720.1			Unknown protein	IPR024326	Ribosomal RNA-processing protein 7
G1_44083	LOC111400927	Oleur061Scf0633g01002	AT3G02160.1	Bromodomain transcription factor	Q5VWG9	Transcription initiation factor TFIID subunit 3	IPR006565::IPR019473	Bromodomain associated domain::Transcription factor TFIID, subunit 8, C-terminal
G1_86266	LOC111400953	Oleur061Scf6827g00008				Unknown protein	IPR024752	Myb/SANT-like domain
G1_118062	LOC111400988	Oleur061Scf6539g00014	AT1G79000.2	histone acetyltransferase of the CBP family 1	Q9C5X9	Histone acetyltransferase HAC1	IPR010303::IPR013083::IPR013178::IPR031162	CREB-binding protein/p300, atypical RING domain::Zinc finger, RING/FYVE/PHD-type::Histone acetyltransferase Rtt109/CBP::CBP/p300-type histone acetyltransferase domain
G1_4857	LOC111400984	Oleur061Scf3433g00020	AT5G60990.1	DEA(D/H)-box RNA helicase family protein	Q2UNB7	ATP-dependent rRNA helicase rrp3	IPR001650::IPR014001::IPR014014::IPR027417	Helicase, C-terminal::Helicase superfamily 1/2, ATP-binding domain::RNA helicase, DEAD-box type, Q motif::P-loop containing nucleoside triphosphate hydrolase
G1_46513	LOC111400984	Oleur061Scf3433g00020	AT5G60990.1	DEA(D/H)-box RNA helicase family protein	Q2UNB7	ATP-dependent rRNA helicase rrp3	IPR001650::IPR014001::IPR014014::IPR027417	Helicase, C-terminal::Helicase superfamily 1/2, ATP-binding domain::RNA helicase, DEAD-box type, Q motif::P-loop containing nucleoside triphosphate hydrolase
G1_96058	LOC111402610	Oleur061Scf2275g09038				Unknown protein
G1_152122	LOC111400178	Oleur061Scf6827g00020	AT5G38720.1			Unknown protein	IPR024326	Ribosomal RNA-processing protein 7
G1_161003	LOC111400927	Oleur061Scf9148g02030	AT3G02160.1	Bromodomain transcription factor	Q5VWG9	Transcription initiation factor TFIID subunit 3	IPR006565::IPR009072::IPR019473	Bromodomain associated domain::Histone-fold::Transcription factor TFIID, subunit 8, C-terminal
G1_18401	LOC111367905	Oleur061Scf6827g00027	AT3G02470.1	S-adenosylmethionine decarboxylase	Q96471	S-adenosylmethionine decarboxylase proenzyme	IPR001985::IPR016067	S-adenosylmethionine decarboxylase::S-adenosylmethionine decarboxylase, core
G1_41344	LOC111400975	Oleur061Scf3433g02005	AT3G50810.1	Uncharacterised protein family (UPF0497)	D7LTJ4	CASP-like protein ARALYDRAFT_485429	IPR006702	Domain of unknown function DUF588
G1_55439	LOC111400953	Oleur061Scf6827g00008				Unknown protein	IPR024752	Myb/SANT-like domain
G1_86152	LOC111400975	Oleur061Scf3433g02005	AT3G50810.1	Uncharacterised protein family (UPF0497)	D7LTJ4	CASP-like protein ARALYDRAFT_485429	IPR006702	Domain of unknown function DUF588
G1_97437	LOC111402610	Oleur061Scf2275g09038				Unknown protein
G1_164819	LOC111400988	Oleur061Scf6539g00014	AT1G79000.2	histone acetyltransferase of the CBP family 1	Q9C5X9	Histone acetyltransferase HAC1	IPR010303::IPR013083::IPR013178::IPR031162	CREB-binding protein/p300, atypical RING domain::Zinc finger, RING/FYVE/PHD-type::Histone acetyltransferase Rtt109/CBP::CBP/p300-type histone acetyltransferase domain
G1_90360	LOC111402592	Oleur061Scf4260g00013	AT4G33355.1	Bifunctional inhibitor/lipid-transfer protein/seed storage 2S albumin superfamily protein	Q39794	Non-specific lipid-transfer protein	IPR000528::IPR016140	Plant lipid transfer protein/Par allergen::Bifunctional inhibitor/plant lipid transfer protein/seed storage helical domain
G1_99617	LOC111400907	Oleur061Scf2029g00027	AT5G15450.1	casein lytic proteinase B3	Q7NFE9	Chaperone protein ClpB	IPR001270::IPR004176::IPR019489::IPR027417::IPR028299	ClpA/B family::Clp, N-terminal::Clp ATPase, C-terminal::P-loop containing nucleoside triphosphate hydrolase::ClpA/B, conserved site 2
G1_16430	LOC111392330	Oleur061Scf8516g02029	AT5G14760.1	L-aspartate oxidase	Q94AY1	L-aspartate oxidase, chloroplastic	IPR003953::IPR023753::IPR027477	FAD-dependent oxidoreductase 2, FAD binding domain::FAD/NADP-binding domain::Succinate dehydrogenase/fumarate reductase flavoprotein, catalytic domain
G1_23169	LOC111400865	Oleur061Scf8516g03040	AT3G28150.1	TRICHOME BIREFRINGENCE-LIKE 22	Q9LFT1	Protein trichome birefringence-like 21	IPR025846::IPR026057	PMR5 N-terminal domain::PC-Esterase
G1_11137	LOC111400820	Oleur061Scf7411g00020	AT3G27350.2		Q9SJ62	Protein WVD2-like 4	IPR027329	TPX2, C-terminal
G1_171614	LOC111400820	Oleur061Scf7411g00020	AT3G27350.2		Q9SJ62	Protein WVD2-like 4	IPR027329	TPX2, C-terminal
G1_127685	LOC111400763	Oleur061Scf1603g01034	AT3G27150.1	Galactose oxidase/kelch repeat superfamily protein	Q9LI89	F-box/kelch-repeat protein At3g27150	IPR015915	Kelch-type beta propeller
G1_193434	LOC111402567
G1_81674	LOC111400763	Oleur061Scf1603g01034	AT3G27150.1	Galactose oxidase/kelch repeat superfamily protein	Q9LI89	F-box/kelch-repeat protein At3g27150	IPR015915	Kelch-type beta propeller
G1_6576	LOC111400765
G1_203677	LOC111400780	Oleur061Scf0430g06019	AT3G26935.1	DHHC-type zinc finger family protein	Q9SB58	Protein S-acyltransferase 8	IPR001594	Palmitoyltransferase, DHHC domain
G2_74284	LOC111404723	Oleur061Scf2262g02017	AT1G16800.1	P-loop containing nucleoside triphosphate hydrolases superfamily protein	Q92355	Helicase sen1	IPR027417	P-loop containing nucleoside triphosphate hydrolase
G2_192794	LOC111406850	Oleur061Scf0074g01003	AT1G67120.1	ATPases;nucleotide binding;ATP binding;nucleoside-triphosphatases;transcription factor binding	Q869L3	Midasin	IPR012099::IPR025662::IPR027417	Midasin::Sigma-54 interaction domain, ATP-binding site 1::P-loop containing nucleoside triphosphate hydrolase
G2_16642	LOC111378837	Oleur061Scf1339g06027	AT3G13840.1	GRAS family transcription factor	Q4VYC8	Nodulation-signaling pathway 1 protein	IPR005202::IPR030015	Transcription factor GRAS::Scarecrow-like protein 29/nodulation signalling pathway 1
G2_145817	LOC111404723	Oleur061Scf0134g06018	AT1G16800.1	P-loop containing nucleoside triphosphate hydrolases superfamily protein	Q92355	Helicase sen1	IPR027417	P-loop containing nucleoside triphosphate hydrolase
G2_51130	LOC111404478	Oleur061Scf5146g00029	AT1G17370.1	oligouridylate binding protein 1B	Q9LQI9	Oligouridylate-binding protein 1B	IPR000504	RNA recognition motif domain
G2_955	LOC111404649	Oleur061Scf8172g00007	AT1G72470.1	exocyst subunit exo70 family protein D1	Q9LZD3	Exocyst complex component EXO70A1	IPR004140::IPR016159	Exocyst complex component Exo70::Cullin repeat-like-containing domain
G2_49672	LOC111380112	Oleur061Scf0850g00006	AT3G16490.1	IQ-domain 26		Unknown protein	IPR000048::IPR025064	IQ motif, EF-hand binding site::Domain of unknown function DUF4005
G2_112097	LOC111406850	Oleur061Scf0074g01003	AT1G67120.1	ATPases;nucleotide binding;ATP binding;nucleoside-triphosphatases;transcription factor binding	Q869L3	Midasin	IPR012099::IPR025662::IPR027417	Midasin::Sigma-54 interaction domain, ATP-binding site 1::P-loop containing nucleoside triphosphate hydrolase
G2_123046	LOC111404649	Oleur061Scf5146g00005	AT1G72470.1	exocyst subunit exo70 family protein D1	Q9LZD3	Exocyst complex component EXO70A1	IPR004140::IPR016159	Exocyst complex component Exo70::Cullin repeat-like-containing domain
G2_179802	LOC111407392	Oleur061Scf8401g00029	AT2G04270.5	RNAse E/G-like	F4IV66	Ribonuclease E/G-like protein, chloroplastic	IPR012340::IPR019307	Nucleic acid-binding, OB-fold::RNA-binding protein AU-1/Ribonuclease E/G
G2_28372	LOC111377462	Oleur061Scf6188g00021	AT5G20000.1	AAA-type ATPase family protein	P41836	26S protease regulatory subunit 8 homolog
G2_93014	LOC111391777	Oleur061Scf4445g00006	AT2G32060.1	Ribosomal protein L7Ae/L30e/S12e/Gadd45 family protein	Q9XHS0	40S ribosomal protein S12	IPR000530::IPR029064	Ribosomal protein S12e::50S ribosomal protein L30e-like
G2_41855	LOC111391787	Oleur061Scf5911g01021	AT5G07350.2	TUDOR-SN protein 1	Q863B3	Staphylococcal nuclease domain-containing protein 1	IPR016685	RNA-induced silencing complex, nuclease component Tudor-SN
G2_41821	LOC111388373	Oleur061Scf7271g03007	AT1G13950.1	eukaryotic elongation factor 5A-1	Q9AXJ4	Eukaryotic translation initiation factor 5A	IPR001884	Translation elongation factor IF5A
G2_61616	LOC111388358	Oleur061Scf8020g00008				Unknown protein	IPR008545	WEB family
G2_84335	LOC111402672	Oleur061Scf1518g02007	AT5G50920.1	CLPC homologue 1	Q9FI56	Chaperone protein ClpC1, chloroplastic	IPR001270::IPR001943::IPR004176::IPR019489::IPR027417::IPR028299	ClpA/B family::UVR domain::Clp, N-terminal::Clp ATPase, C-terminal::P-loop containing nucleoside triphosphate hydrolase::ClpA/B, conserved site 2
G2_77965	LOC111410099	Oleur061Scf1774g00036	AT4G24680.1	modifier of snc1	Q9SB63	Protein MODIFIER OF SNC1 1
G2_126026	LOC111409796	Oleur061Scf1774g00044	AT5G63040.1			Unknown protein
G2_84811	LOC111399479	Oleur061Scf0701g01002	AT5G63320.1	nuclear protein X1	Q9FGW9	Transcription factor GTE10	IPR001487::IPR027353	Bromodomain::NET domain
G2_65663	LOC111411334	Oleur061Scf0986g07031				Unknown protein
G2_32995	LOC111403257	Oleur061Scf0243g00002	AT2G39260.1	binding;RNA binding	F4IUX6	Regulator of nonsense transcripts UPF2	IPR016024	Armadillo-type fold
G2_41444	LOC111371375	Oleur061Scf2406g03028	AT1G73370.1	sucrose synthase 6	P13708	Sucrose synthase	IPR012820	Sucrose synthase, plant/cyanobacteria
G2_24023	LOC111405426	Oleur061Scf0332g02014	AT1G08530.1			Unknown protein
G2_106067	LOC111393807	Oleur061Scf9144g01007	AT4G27780.1	acyl-CoA binding protein 2	Q4V8X4	Acyl-CoA-binding domain-containing protein 6	IPR014352::IPR020683	FERM/acyl-CoA-binding protein, 3-helical bundle::Ankyrin repeat-containing domain
G2_73662	LOC111394183	Oleur061Scf0308g09003	AT5G49220.1	Protein of unknown function (DUF789)		Unknown protein	IPR008507	Protein of unknown function DUF789
G2_9723	LOC111394808	Oleur061Scf8854g00044	AT1G03000.1	peroxin 6	Q8RY16	Peroxisome biogenesis protein 6	IPR003959::IPR027417	ATPase, AAA-type, core::P-loop containing nucleoside triphosphate hydrolase
G2_87924	LOC111394774
G2_39350	LOC111395443	Oleur061Scf7461g05027	AT1G23740.1	Oxidoreductase, zinc-binding dehydrogenase family protein	K4BW79	2-methylene-furan-3-one reductase	IPR016040::IPR020843	NADP-binding domain::Polyketide synthase, enoylreductase domain
G2_164043	LOC111395421	Oleur061Scf6918g00039	AT5G05670.2	signal recognition particle binding	P47758	Signal recognition particle receptor subunit beta	IPR006689::IPR019009::IPR027417	Small GTPase superfamily, ARF/SAR type::Signal recognition particle receptor, beta subunit::P-loop containing nucleoside triphosphate hydrolase
G2_113833	LOC111395727	Oleur061Scf5120g00001	AT1G69850.1	nitrate transporter 1:2	Q8H157	Protein NRT1/ PTR FAMILY 4.6	IPR000109::IPR020846	Proton-dependent oligopeptide transporter family::Major facilitator superfamily domain
G2_4221	LOC111406190	Oleur061Scf1314g01017	AT5G16000.1	NSP-interacting kinase 1	Q9LFS4	Protein NSP-INTERACTING KINASE 1	IPR001611::IPR013210::IPR032675	Leucine-rich repeat::Leucine-rich repeat-containing N-terminal, plant-type::Leucine-rich repeat domain, L domain-like
G2_128447	LOC111374812	Oleur061Scf0543g05003	AT1G68570.1	Major facilitator superfamily protein	Q9SX20	Protein NRT1/ PTR FAMILY 3.1	IPR000109::IPR020846	Proton-dependent oligopeptide transporter family::Major facilitator superfamily domain
G2_131636	LOC111374812	Oleur061Scf4327g00002	AT1G68570.1	Major facilitator superfamily protein	Q9SX20	Protein NRT1/ PTR FAMILY 3.1	IPR000109::IPR020846	Proton-dependent oligopeptide transporter family::Major facilitator superfamily domain
G2_114295	LOC111395218	Oleur061Scf0231g07008	AT2G01480.1	O-fucosyltransferase family protein		Unknown protein	IPR019378	GDP-fucose protein O-fucosyltransferase
G2_5582	LOC111396346	Oleur061Scf6266g03012	AT5G51270.1	U-box domain-containing protein kinase family protein	Q9SFX2	U-box domain-containing protein 43	IPR013083::IPR016024	Zinc finger, RING/FYVE/PHD-type::Armadillo-type fold
G2_20163	LOC111385571	Oleur061Scf6266g01013	AT3G49260.3	IQ-domain 21	Q9SF32	Protein IQ-DOMAIN 1	IPR000048::IPR025064	IQ motif, EF-hand binding site::Domain of unknown function DUF4005
G2_10785	LOC111396486	Oleur061Scf4263g09006	AT4G23740.1	Leucine-rich repeat protein kinase family protein	Q9FL63	Inactive leucine-rich repeat receptor-like serine/threonine-protein kinase At5g24100	IPR001611::IPR011009::IPR013210::IPR013320::IPR032675	Leucine-rich repeat::Protein kinase-like domain::Leucine-rich repeat-containing N-terminal, plant-type::Concanavalin A-like lectin/glucanase domain::Leucine-rich repeat domain, L domain-like
G2_65111	LOC111385571	Oleur061Scf6266g01013	AT3G49260.3	IQ-domain 21	Q9SF32	Protein IQ-DOMAIN 1	IPR000048::IPR025064	IQ motif, EF-hand binding site::Domain of unknown function DUF4005
G2_83609	LOC111396486	Oleur061Scf4263g09006	AT4G23740.1	Leucine-rich repeat protein kinase family protein	Q9FL63	Inactive leucine-rich repeat receptor-like serine/threonine-protein kinase At5g24100	IPR001611::IPR011009::IPR013210::IPR013320::IPR032675	Leucine-rich repeat::Protein kinase-like domain::Leucine-rich repeat-containing N-terminal, plant-type::Concanavalin A-like lectin/glucanase domain::Leucine-rich repeat domain, L domain-like
G2_17793	LOC111396504	Oleur061Scf4263g11003	AT1G76490.1	hydroxy methylglutaryl CoA reductase 1	P48021	3-hydroxy-3-methylglutaryl-coenzyme A reductase	IPR002202::IPR023074::IPR023282	Hydroxymethylglutaryl-CoA reductase, class I/II::Hydroxymethylglutaryl-CoA reductase, class I/II, catalytic domain::Hydroxymethylglutaryl-CoA reductase, N-terminal
G2_112997	LOC111377541	Oleur061Scf2210g02010	AT1G47710.1	Serine protease inhibitor (SERPIN) family protein	Q9S7T8	Serpin-ZX	IPR000215::IPR023795::IPR023796	Serpin family::Serpin, conserved site::Serpin domain
G2_64249	LOC111397491	Oleur061Scf2580g01015				Unknown protein
G2_177806	LOC111398208	Oleur061Scf8795g02042	AT3G08947.1	ARM repeat superfamily protein	Q9FJD4	Importin subunit beta-1	IPR016024::IPR027140	Armadillo-type fold::Importin subunit beta-1, plants
G2_91065	LOC111398893	Oleur061Scf8795g04008	AT5G03570.1	iron regulated 2	O80905	Solute carrier family 40 member 1	IPR009716::IPR020846	Ferroporti-1::Major facilitator superfamily domain
G2_98387	LOC111398893	Oleur061Scf8795g04008	AT5G03570.1	iron regulated 2	O80905	Solute carrier family 40 member 1	IPR009716::IPR020846	Ferroporti-1::Major facilitator superfamily domain
G2_11228	LOC111398569	Oleur061Scf6944g00018	AT4G20780.1	calmodulin like 42	Q9SVG9	Calcium-binding protein CML42	IPR011992	EF-hand domain pair
G2_110104	LOC111398778	Oleur061Scf8795g05052	AT3G51610.1			Unknown protein
G2_141806	LOC111398520	Oleur061Scf6944g01019	AT2G38640.1	Protein of unknown function (DUF567)	A0MFL4	Protein LURP-one-related 17	IPR025659	Tubby C-terminal-like domain
G2_45304	LOC111399285	Oleur061Scf0694g05039	AT1G14710.1	hydroxyproline-rich glycoprotein family protein		Unknown protein
G2_109314	LOC111399285	Oleur061Scf0694g05039	AT1G14710.1	hydroxyproline-rich glycoprotein family protein		Unknown protein
G2_6967	LOC111399732	Oleur061Scf3436g01019	AT2G39390.1	Ribosomal L29 family protein	Q9M5L0	60S ribosomal protein L35	IPR001854	Ribosomal protein L29/L36
G2_61776	LOC111399732	Oleur061Scf3436g01019	AT2G39390.1	Ribosomal L29 family protein	Q9M5L0	60S ribosomal protein L35	IPR001854	Ribosomal protein L29/L36
G2_13208	LOC111407033	Oleur061Scf8271g01024	AT5G60410.2	DNA-binding protein with MIZ/SP-RING zinc finger, PHD-finger and SAP domain	Q680Q4	E3 SUMO-protein ligase SIZ1	IPR003034::IPR004181::IPR013083::IPR031141	SAP domain::Zinc finger, MIZ-type::Zinc finger, RING/FYVE/PHD-type::E3 SUMO-protein ligase SIZ1, plant
G2_17602	LOC111407033	Oleur061Scf8271g01024	AT5G60410.2	DNA-binding protein with MIZ/SP-RING zinc finger, PHD-finger and SAP domain	Q680Q4	E3 SUMO-protein ligase SIZ1	IPR003034::IPR004181::IPR013083::IPR031141	SAP domain::Zinc finger, MIZ-type::Zinc finger, RING/FYVE/PHD-type::E3 SUMO-protein ligase SIZ1, plant
G2_24215	LOC111400245	Oleur061Scf0813g04001	AT2G28260.1	cyclic nucleotide-gated channel 15	O65717	Cyclic nucleotide-gated ion channel 1	IPR000048::IPR005821::IPR007877::IPR014710	IQ motif, EF-hand binding site::Ion transport domain::Protein of unknown function DUF707::RmlC-like jelly roll fold
G2_83834	LOC111400468	Oleur061Scf0813g06005	AT3G45010.1	serine carboxypeptidase-like 48	P52712	Serine carboxypeptidase-like	IPR001563::IPR029058::IPR033124	Peptidase S10, serine carboxypeptidase::Alpha/Beta hydrolase fold::Serine carboxypeptidases, histidine active site
G2_148747	LOC111400187	Oleur061Scf0813g03010	AT5G60690.1	Homeobox-leucine zipper family protein / lipid-binding START domain-containing protein	Q9SE43	Homeobox-leucine zipper protein REVOLUTA	IPR009057::IPR013978::IPR023393	Homeobox domain-like::MEKHLA::START-like domain
G2_130983	LOC111407231	Oleur061Scf5595g01003	AT2G27310.1	F-box family protein	Q9XIN8	F-box protein At2g27310	IPR001810	F-box domain
G2_5034	LOC111400935	Oleur061Scf2294g00019	AT5G12860.1	dicarboxylate transporter 1	Q9LXV3	Dicarboxylate transporter 1, chloroplastic	IPR001898	Solute carrier family 13
G2_52391	LOC111401990	Oleur061Scf7729g01019	AT5G19330.1	ARM repeat protein interacting with ABF2	B9DHT4	ARM REPEAT PROTEIN INTERACTING WITH ABF2	IPR011333::IPR016024	SKP1/BTB/POZ domain::Armadillo-type fold
G2_102824	LOC111401519	Oleur061Scf1424g03027	AT2G30620.1	winged-helix DNA-binding transcription factor family protein	P37218	Histone H1	IPR011991	Winged helix-turn-helix DNA-binding domain
G2_190301	LOC111405824	Oleur061Scf6030g00003				Unknown protein
G2_25189	LOC111400942	Oleur061Scf1163g01034	AT4G14700.1	origin recognition complex 1	Q5SMU7	Origin of replication complex subunit 1	IPR001025::IPR003959::IPR013083::IPR027417	Bromo adjacent homology BAH domain::ATPase, AAA-type, core::Zinc finger, RING/FYVE/PHD-type::P-loop containing nucleoside triphosphate hydrolase
G2_69723	LOC111400710	Oleur061Scf3133g03043	AT1G08440.1	Aluminium activated malate transporter family protein	Q9SJE8	Aluminum-activated malate transporter 2	IPR020966	Aluminum-activated malate transporter
G2_10179	LOC111400935	Oleur061Scf2294g00019	AT5G12860.1	dicarboxylate transporter 1	Q9LXV3	Dicarboxylate transporter 1, chloroplastic	IPR001898	Solute carrier family 13
G2_23992	LOC111400710	Oleur061Scf3133g03043	AT1G08440.1	Aluminium activated malate transporter family protein	Q9SJE8	Aluminum-activated malate transporter 2	IPR020966	Aluminum-activated malate transporter
G2_28004	LOC111401302	Oleur061Scf8616g00005	AT3G13460.1	evolutionarily conserved C-terminal region 2	Q9Y5A9	YTH domain-containing family protein 2	IPR007275	YTH domain
G2_39082	LOC111400710	Oleur061Scf3133g03043	AT1G08440.1	Aluminium activated malate transporter family protein	Q9SJE8	Aluminum-activated malate transporter 2	IPR020966	Aluminum-activated malate transporter
G2_115252	LOC111400935	Oleur061Scf2294g00019	AT5G12860.1	dicarboxylate transporter 1	Q9LXV3	Dicarboxylate transporter 1, chloroplastic	IPR001898	Solute carrier family 13
G2_27247	LOC111400942	Oleur061Scf1163g01034	AT4G14700.1	origin recognition complex 1	Q5SMU7	Origin of replication complex subunit 1	IPR001025::IPR003959::IPR013083::IPR027417	Bromo adjacent homology BAH domain::ATPase, AAA-type, core::Zinc finger, RING/FYVE/PHD-type::P-loop containing nucleoside triphosphate hydrolase
G2_16545	LOC111400942	Oleur061Scf1163g01034	AT4G14700.1	origin recognition complex 1	Q5SMU7	Origin of replication complex subunit 1	IPR001025::IPR003959::IPR013083::IPR027417	Bromo adjacent homology BAH domain::ATPase, AAA-type, core::Zinc finger, RING/FYVE/PHD-type::P-loop containing nucleoside triphosphate hydrolase
G2_2979	LOC111402569	Oleur061Scf1057g18009	AT5G44010.1			Unknown protein
G2_24059	LOC111407852	Oleur061Scf1057g15038	AT5G43900.3	myosin 2	Q9LKB9	Myosin-6	IPR000048::IPR002710::IPR004009::IPR027417	IQ motif, EF-hand binding site::Dilute domain::Myosin, N-terminal, SH3-like::P-loop containing nucleoside triphosphate hydrolase
G2_30876	LOC111402053	Oleur061Scf0652g12008	AT4G02680.1	ETO1-like 1	Q9ZQX6	ETO1-like protein 1	IPR011333	SKP1/BTB/POZ domain
G2_32439	LOC111402569
G2_50741	LOC111407852	Oleur061Scf1057g15038	AT5G43900.3	myosin 2	Q9LKB9	Myosin-6	IPR000048::IPR002710::IPR004009::IPR027417	IQ motif, EF-hand binding site::Dilute domain::Myosin, N-terminal, SH3-like::P-loop containing nucleoside triphosphate hydrolase
G2_82808	LOC111401400	Oleur061Scf5128g00016	AT3G63400.1	Cyclophilin-like peptidyl-prolyl cis-trans isomerase family protein	P21568	Peptidyl-prolyl cis-trans isomerase	IPR002130::IPR024936::IPR029000	Cyclophilin-type peptidyl-prolyl cis-trans isomerase domain::Cyclophilin-type peptidyl-prolyl cis-trans isomerase::Cyclophilin-like domain
G2_84698	LOC111402380	Oleur061Scf0084g00035	AT1G08800.1	Protein of unknown function, DUF593	F4HXQ7	Myosin-binding protein 1	IPR007656	GTD-binding domain
G2_85563	LOC111402594	Oleur061Scf1057g17018	AT3G04400.1	Ribosomal protein L14p/L23e family protein	P49690	60S ribosomal protein L23	IPR000218	Ribosomal protein L14P
G2_109298	LOC111401784	Oleur061Scf7729g04003	AT5G11860.1	SCP1-like small phosphatase 5	Q54GB2	CTD small phosphatase-like protein 2	IPR004274::IPR023214	FCP1 homology domain::HAD-like domain
G2_126784	LOC111402063	Oleur061Scf0652g12033	AT3G06190.1	BTB-POZ and MATH domain 2	Q9M8J9	BTB/POZ and MATH domain-containing protein 2	IPR008974::IPR011333	TRAF-like::SKP1/BTB/POZ domain
G2_173410	LOC111401519	Oleur061Scf1424g03027	AT2G30620.1	winged-helix DNA-binding transcription factor family protein	P37218	Histone H1	IPR011991	Winged helix-turn-helix DNA-binding domain
G2_180953	LOC111402558	Oleur061Scf1057g18017	AT4G28610.1	phosphate starvation response 1	Q94CL7	Protein PHOSPHATE STARVATION RESPONSE 1	IPR009057::IPR025756	Homeobox domain-like::MYB-CC type transcription factor, LHEQLE-containing domain
G2_27152	LOC111401400	Oleur061Scf5128g00016	AT3G63400.1	Cyclophilin-like peptidyl-prolyl cis-trans isomerase family protein	P21568	Peptidyl-prolyl cis-trans isomerase	IPR002130::IPR024936::IPR029000	Cyclophilin-type peptidyl-prolyl cis-trans isomerase domain::Cyclophilin-type peptidyl-prolyl cis-trans isomerase::Cyclophilin-like domain
G2_113557	LOC111402063	Oleur061Scf0652g12033	AT3G06190.1	BTB-POZ and MATH domain 2	Q9M8J9	BTB/POZ and MATH domain-containing protein 2	IPR008974::IPR011333	TRAF-like::SKP1/BTB/POZ domain
G2_43577	LOC111401990	Oleur061Scf7729g01019	AT5G19330.1	ARM repeat protein interacting with ABF2	B9DHT4	ARM REPEAT PROTEIN INTERACTING WITH ABF2	IPR011333::IPR016024	SKP1/BTB/POZ domain::Armadillo-type fold
G2_3958	LOC111401752	Oleur061Scf7729g04023	AT5G43270.2	squamosa promoter binding protein-like 2	A2YGR5	Squamosa promoter-binding-like protein 12	IPR004333	Transcription factor, SBP-box
G2_15930	LOC111401752	Oleur061Scf7729g04023	AT5G43270.2	squamosa promoter binding protein-like 2	A2YGR5	Squamosa promoter-binding-like protein 12	IPR004333	Transcription factor, SBP-box
G2_75282	LOC111376338	Oleur061Scf6329g00014	AT1G69040.2	ACT domain repeat 4	Q8LJW3	ACT domain-containing protein ACR4
G2_97055	LOC111376338	Oleur061Scf6329g00014	AT1G69040.2	ACT domain repeat 4	Q8LJW3	ACT domain-containing protein ACR4
G3_133766	LOC111381304	Oleur061Scf0756g03021	AT3G13570.1	SC35-like splicing factor 30A	Q9LHP2	Serine/arginine-rich SC35-like splicing factor SCL30A	IPR000504	RNA recognition motif domain
G3_173194	LOC111381304	Oleur061Scf0756g03021	AT3G13570.1	SC35-like splicing factor 30A	Q9LHP2	Serine/arginine-rich SC35-like splicing factor SCL30A	IPR000504	RNA recognition motif domain
G3_8663	LOC111392344	Oleur061Scf7101g00029	AT3G45140.1	lipoxygenase 2	P38418	Lipoxygenase 2, chloroplastic	IPR000907::IPR027433	Lipoxygenase::Lipoxygenase, domain 3
G3_22948	LOC111393821	Oleur061Scf7261g00005	AT3G46200.1	nudix hydrolase homolog 9	Q6P9U1	Nucleoside diphosphate-linked moiety X motif 22	IPR015797	NUDIX hydrolase domain-like
G3_98961	LOC111393823	Oleur061Scf7653g05035	AT3G46280.1	protein kinase-related	Q9LIG2	Receptor-like protein kinase At3g21340	IPR024788::IPR032675	Malectin-like carbohydrate-binding domain::Leucine-rich repeat domain, L domain-like
G3_120365	LOC111392344	Oleur061Scf7101g00029	AT3G45140.1	lipoxygenase 2	P38418	Lipoxygenase 2, chloroplastic	IPR000907::IPR027433	Lipoxygenase::Lipoxygenase, domain 3
G3_94284	LOC111393823	Oleur061Scf7653g05035	AT3G46280.1	protein kinase-related	Q9LIG2	Receptor-like protein kinase At3g21340	IPR024788::IPR032675	Malectin-like carbohydrate-binding domain::Leucine-rich repeat domain, L domain-like
G3_32577	LOC111393284	Oleur061Scf3674g01006	AT3G45140.1	lipoxygenase 2	P38418	Lipoxygenase 2, chloroplastic	IPR000907::IPR027433	Lipoxygenase::Lipoxygenase, domain 3
G3_39704	LOC111393321	Oleur061Scf1272g05036	AT5G32470.1	Haem oxygenase-like, multi-helical		Unknown protein	IPR016084::IPR023214	Haem oxygenase-like, multi-helical::HAD-like domain
G3_57374	LOC111393272	Oleur061Scf0683g06010				Unknown protein
G3_75015	LOC111393272	Oleur061Scf0683g06010				Unknown protein
G3_189395	LOC111393272	Oleur061Scf0683g06010				Unknown protein
G3_25311	LOC111393331	Oleur061Scf1272g07026	AT5G43900.3	myosin 2	Q9LKB9	Myosin-6	IPR000048::IPR002710::IPR027417	IQ motif, EF-hand binding site::Dilute domain::P-loop containing nucleoside triphosphate hydrolase
G3_55487	LOC111393272	Oleur061Scf0683g06010				Unknown protein
G3_55584	LOC111393309	Oleur061Scf1272g03014	AT1G51190.1	Integrase-type DNA-binding superfamily protein	Q5YGP7	AP2-like ethylene-responsive transcription factor PLT2	IPR016177::IPR031112	DNA-binding domain::AP2-like ethylene-responsive transcription factor
G3_70204	LOC111393309	Oleur061Scf1272g03014	AT1G51190.1	Integrase-type DNA-binding superfamily protein	Q5YGP7	AP2-like ethylene-responsive transcription factor PLT2	IPR016177::IPR031112	DNA-binding domain::AP2-like ethylene-responsive transcription factor
G3_102561	LOC111393332	Oleur061Scf8972g00010	AT3G54540.1	general control non-repressible 4	Q8NE71	ATP-binding cassette sub-family F member 1	IPR003439::IPR027417	ABC transporter-like::P-loop containing nucleoside triphosphate hydrolase
G3_113951	LOC111393332	Oleur061Scf8972g00010	AT3G54540.1	general control non-repressible 4	Q8NE71	ATP-binding cassette sub-family F member 1	IPR003439::IPR027417	ABC transporter-like::P-loop containing nucleoside triphosphate hydrolase
G3_116312	LOC111393331	Oleur061Scf1272g07026	AT5G43900.3	myosin 2	Q9LKB9	Myosin-6	IPR000048::IPR002710::IPR027417	IQ motif, EF-hand binding site::Dilute domain::P-loop containing nucleoside triphosphate hydrolase
G3_197725	LOC111393309	Oleur061Scf1182g04027	AT1G51190.1	Integrase-type DNA-binding superfamily protein	Q5YGP7	AP2-like ethylene-responsive transcription factor PLT2	IPR016177::IPR031112	DNA-binding domain::AP2-like ethylene-responsive transcription factor
G3_37682	LOC111393723	Oleur061Scf8478g01010	AT1G10930.1	DNA helicase (RECQl4A)	Q9CL21	ATP-dependent DNA helicase RecQ	IPR004589::IPR011991::IPR027417::IPR029491::IPR032284	DNA helicase, ATP-dependent, RecQ type::Winged helix-turn-helix DNA-binding domain::P-loop containing nucleoside triphosphate hydrolase::Helicase Helix-turn-helix domain::ATP-dependent DNA helicase RecQ, zinc-binding domain
G3_51284	LOC111378858	Oleur061Scf7041g00018	AT5G48940.1	Leucine-rich repeat transmembrane protein kinase family protein	C0LGV1	LRR receptor-like serine/threonine-protein kinase RCH1	IPR001611::IPR003591::IPR011009::IPR032675	Leucine-rich repeat::Leucine-rich repeat, typical subtype::Protein kinase-like domain::Leucine-rich repeat domain, L domain-like
G3_76101	LOC111385817	Oleur061Scf3000g03019	AT3G07210.1		Q39290	DNA-directed RNA polymerases I, II, and III subunit RPABC5	IPR000268::IPR009003::IPR009057::IPR023580	DNA-directed RNA polymerase, subunit N/Rpb10::Peptidase S1, PA clan::Homeobox domain-like::RNA polymerase subunit RPB10
G3_118790	LOC111373592	Oleur061Scf3000g05014	AT3G24870.1	Helicase/SANT-associated, DNA binding protein	F4J7T3	Chromatin modification-related protein EAF1 A	IPR009057::IPR014012	Homeobox domain-like::Helicase/SANT-associated domain
G3_152774	LOC111373592	Oleur061Scf3000g05014	AT3G24870.1	Helicase/SANT-associated, DNA binding protein	F4J7T3	Chromatin modification-related protein EAF1 A	IPR009057::IPR014012	Homeobox domain-like::Helicase/SANT-associated domain
G3_181358	LOC111385817	Oleur061Scf3000g03019	AT3G07210.1		Q39290	DNA-directed RNA polymerases I, II, and III subunit RPABC5	IPR000268::IPR009003::IPR009057::IPR023580	DNA-directed RNA polymerase, subunit N/Rpb10::Peptidase S1, PA clan::Homeobox domain-like::RNA polymerase subunit RPB10
G3_149414	LOC111386924
G3_5420	LOC111393216	Oleur061Scf8028g00006	AT2G30470.1	high-level expression of sugar-inducible gene 2	Q8W4L5	B3 domain-containing transcription repressor VAL1	IPR011124::IPR015300	Zinc finger, CW-type::DNA-binding pseudobarrel domain
G3_25428	LOC111393491	Oleur061Scf6622g04014	AT5G60580.2	RING/U-box superfamily protein		Unknown protein	IPR013083::IPR033275	Zinc finger, RING/FYVE/PHD-type::E3 ubiquitin-protein ligase MARCH-like
G3_39471	LOC111392140	Oleur061Scf9156g04013	AT2G45260.1	Plant protein of unknown function (DUF641)		Unknown protein	IPR006943	Domain of unknown function DUF641, plant
G3_43081	LOC111383532	Oleur061Scf9156g08013	AT2G13620.1	cation/hydrogen exchanger 15	Q9SIT5	Cation/H(+) antiporter 15	IPR006153	Cation/H+ exchanger
G3_44095	LOC111383532	Oleur061Scf9156g08013	AT2G13620.1	cation/hydrogen exchanger 15	Q9SIT5	Cation/H(+) antiporter 15	IPR006153	Cation/H+ exchanger
G3_48801	LOC111393212	Oleur061Scf6023g00011	AT3G51620.2	PAP/OAS1 substrate-binding domain superfamily		Unknown protein	IPR002058	PAP/25A-associated
G3_63179	LOC111393212	Oleur061Scf6023g00011	AT3G51620.2	PAP/OAS1 substrate-binding domain superfamily		Unknown protein	IPR002058	PAP/25A-associated
G3_92019	LOC111393230	Oleur061Scf6023g04017	AT5G01970.1			Unknown protein
G3_104330	LOC111393216	Oleur061Scf8028g00006	AT2G30470.1	high-level expression of sugar-inducible gene 2	Q8W4L5	B3 domain-containing transcription repressor VAL1	IPR011124::IPR015300	Zinc finger, CW-type::DNA-binding pseudobarrel domain
G3_119027	LOC111393216	Oleur061Scf8028g00006	AT2G30470.1	high-level expression of sugar-inducible gene 2	Q8W4L5	B3 domain-containing transcription repressor VAL1	IPR011124::IPR015300	Zinc finger, CW-type::DNA-binding pseudobarrel domain
G3_124335	LOC111393225	Oleur061Scf6023g03009	AT4G27950.1	cytokinin response factor 4	Q9SUE3	Ethylene-responsive transcription factor CRF4	IPR016177::IPR017392	DNA-binding domain::AP2/ERF transcription factor ERF/PTI6
G3_135259	LOC111392140	Oleur061Scf9156g04013	AT2G45260.1	Plant protein of unknown function (DUF641)		Unknown protein	IPR006943	Domain of unknown function DUF641, plant
G3_152246	LOC111381417	Oleur061Scf9156g09025	AT2G30210.1	laccase 3	Q56YT0	Laccase-3	IPR017761::IPR033138	Laccase::Multicopper oxidases, conserved site
G3_204309	LOC111383526	Oleur061Scf9156g07014	AT2G38470.1	WRKY DNA-binding protein 33	Q6VWJ6	WRKY transcription factor SUSIBA2	IPR003657	WRKY domain
G3_12784	LOC111393496	Oleur061Scf6622g04012	AT2G28390.1	SAND family protein	Q86VX9	Vacuolar fusion protein MON1 homolog A	IPR004353::IPR007608	Vacuolar fusion protein Mon1::Senescence regulator S40
G3_15593	LOC111393490	Oleur061Scf6550g03017	AT5G60710.1	Zinc finger (C3HC4-type RING finger) family protein		Unknown protein	IPR002035::IPR013083::IPR032838	von Willebrand factor, type A::Zinc finger, RING/FYVE/PHD-type::VWA-Hint protein, Vwaint domain
G3_153604	LOC111393490	Oleur061Scf6622g03007	AT5G60710.1	Zinc finger (C3HC4-type RING finger) family protein		Unknown protein	IPR002035::IPR013083::IPR032838	von Willebrand factor, type A::Zinc finger, RING/FYVE/PHD-type::VWA-Hint protein, Vwaint domain
G3_19374	LOC111379408	Oleur061Scf3163g02045				Unknown protein
G3_19803	LOC111393531	Oleur061Scf0570g10018	AT1G07510.1	FTSH protease 10	Q84WU8	ATP-dependent zinc metalloprotease FTSH 3, mitochondrial	IPR003959::IPR005936::IPR011546::IPR027417	ATPase, AAA-type, core::Peptidase, FtsH::Peptidase M41, FtsH extracellular::P-loop containing nucleoside triphosphate hydrolase
G3_22083	LOC111376575	Oleur061Scf3272g08006	AT1G10830.1	15-cis-zeta-carotene isomerase	Q9SAC0	15-cis-zeta-carotene isomerase, chloroplastic	IPR009915	NnrU domain
G3_24226	LOC111393852	Oleur061Scf2963g01047	AT5G58880.1			Unknown protein
G3_29363	LOC111393852	Oleur061Scf2963g01047	AT5G58880.1			Unknown protein
G3_34711	LOC111393659	Oleur061Scf3202g00019	AT1G07970.1			Unknown protein	IPR019176	Cytochrome B561-related
G3_38351	LOC111393531	Oleur061Scf0570g10018	AT1G07510.1	FTSH protease 10	Q84WU8	ATP-dependent zinc metalloprotease FTSH 3, mitochondrial	IPR003959::IPR005936::IPR011546::IPR027417	ATPase, AAA-type, core::Peptidase, FtsH::Peptidase M41, FtsH extracellular::P-loop containing nucleoside triphosphate hydrolase
G3_53983	LOC111379408	Oleur061Scf0570g10004				Unknown protein
G3_73320	LOC111393521	Oleur061Scf0570g09005	AT3G45640.1	mitogen-activated protein kinase 3	Q39023	Mitogen-activated protein kinase 3	IPR011009	Protein kinase-like domain
G3_95262	LOC111393535	Oleur061Scf5763g00006	AT2G29200.1	pumilio 1	Q9ZW06	Pumilio homolog 2	IPR012940::IPR016024	Nucleic acid binding NABP::Armadillo-type fold
G3_95758	LOC111376575	Oleur061Scf3272g08006	AT1G10830.1	15-cis-zeta-carotene isomerase	Q9SAC0	15-cis-zeta-carotene isomerase, chloroplastic	IPR009915	NnrU domain
G3_112502	LOC111393666	Oleur061Scf0570g08001	AT5G60210.1	ROP interactive partner 5	Q9LSS5	Interactor of constitutive active ROPs 3	IPR029688	Interactor of constitutive active ROPs
G3_141613	LOC111393496	Oleur061Scf6622g04012	AT2G28390.1	SAND family protein	Q86VX9	Vacuolar fusion protein MON1 homolog A	IPR004353::IPR007608	Vacuolar fusion protein Mon1::Senescence regulator S40
G3_183173	LOC111393521	Oleur061Scf0570g09005	AT3G45640.1	mitogen-activated protein kinase 3	Q39023	Mitogen-activated protein kinase 3	IPR011009	Protein kinase-like domain
G3_5488	LOC111394086	Oleur061Scf2371g00001	AT1G61560.1	Seven transmembrane MLO family protein	Q94KB7	MLO-like protein 6	IPR004326	Mlo-related protein
G3_7973	LOC111393659	Oleur061Scf3202g00019	AT1G07970.1			Unknown protein	IPR019176	Cytochrome B561-related
G3_12223	LOC111393666	Oleur061Scf0570g08001	AT5G60210.1	ROP interactive partner 5	Q9LSS5	Interactor of constitutive active ROPs 3	IPR029688	Interactor of constitutive active ROPs
G3_123385	LOC111394086	Oleur061Scf2371g00001	AT1G61560.1	Seven transmembrane MLO family protein	Q94KB7	MLO-like protein 6	IPR004326	Mlo-related protein
G3_56333	LOC111394069	Oleur061Scf3272g03012	AT1G65810.1	P-loop containing nucleoside triphosphate hydrolases superfamily protein	Q8BV79	TPR and ankyrin repeat-containing protein 1	IPR014016::IPR027417	UvrD-like helicase, ATP-binding domain::P-loop containing nucleoside triphosphate hydrolase
G3_86653	LOC111394069	Oleur061Scf3272g03012	AT1G65810.1	P-loop containing nucleoside triphosphate hydrolases superfamily protein	Q8BV79	TPR and ankyrin repeat-containing protein 1	IPR014016::IPR027417	UvrD-like helicase, ATP-binding domain::P-loop containing nucleoside triphosphate hydrolase
G3_102616	LOC111394069	Oleur061Scf3272g03012	AT1G65810.1	P-loop containing nucleoside triphosphate hydrolases superfamily protein	Q8BV79	TPR and ankyrin repeat-containing protein 1	IPR014016::IPR027417	UvrD-like helicase, ATP-binding domain::P-loop containing nucleoside triphosphate hydrolase
G3_15270	LOC111394069	Oleur061Scf3272g03012	AT1G65810.1	P-loop containing nucleoside triphosphate hydrolases superfamily protein	Q8BV79	TPR and ankyrin repeat-containing protein 1	IPR014016::IPR027417	UvrD-like helicase, ATP-binding domain::P-loop containing nucleoside triphosphate hydrolase
G3_107681	LOC111393587	Oleur061Scf3272g01021	AT2G31730.1	basic helix-loop-helix (bHLH) DNA-binding superfamily protein	Q9LT67	Transcription factor bHLH113	IPR011598	Myc-type, basic helix-loop-helix bHLH domain
G3_130683	LOC111393587	Oleur061Scf3272g01021	AT2G31730.1	basic helix-loop-helix (bHLH) DNA-binding superfamily protein	Q9LT67	Transcription factor bHLH113	IPR011598	Myc-type, basic helix-loop-helix bHLH domain
G3_42016	LOC111386740	Oleur061Scf4622g06015	AT5G19300.1			Unknown protein	IPR003750::IPR012340::IPR029028	Putative RNA methyltransferase::Nucleic acid-binding, OB-fold::Alpha/beta knot methyltransferases
G3_43261	LOC111393421	Oleur061Scf4622g01027	AT5G18960.1	FAR1-related sequence 12	Q3E7I5	Protein FAR1-RELATED SEQUENCE 12	IPR004330::IPR007527::IPR031052	FAR1 DNA binding domain::Zinc finger, SWIM-type::FHY3/FAR1 family
G3_64020	LOC111387927	Oleur061Scf5018g00002	AT4G02810.1	Protein of unknown function (DUF3049)	Q9SY06	Protein FANTASTIC FOUR 1	IPR021410	The fantastic four family
G3_95238	LOC111373573	Oleur061Scf5054g00004	AT3G48700.1	carboxyesterase 13	I4DST9	Tuliposide A-converting enzyme 2, chloroplastic	IPR029058	Alpha/Beta hydrolase fold
G3_102921	LOC111386738	Oleur061Scf4622g06012	AT5G19280.2	kinase associated protein phosphatase	P46014	Protein phosphatase 2C 70	IPR001932::IPR008984::IPR015655	PPM-type phosphatase domain::SMAD/FHA domain::Protein phosphatase 2C family
G3_105355	LOC111384396	Oleur061Scf0732g05028	AT3G06330.1	RING/U-box superfamily protein		Unknown protein	IPR013083::IPR033275	Zinc finger, RING/FYVE/PHD-type::E3 ubiquitin-protein ligase MARCH-like
G3_111806	LOC111386738	Oleur061Scf4622g06012	AT5G19280.2	kinase associated protein phosphatase	P46014	Protein phosphatase 2C 70	IPR001932::IPR008984::IPR015655	PPM-type phosphatase domain::SMAD/FHA domain::Protein phosphatase 2C family
G3_122	LOC111393404	Oleur061Scf4996g00036	AT3G16910.1	acyl-activating enzyme 7	Q8VZF1	Acetate/butyrate--CoA ligase AAE7, peroxisomal	IPR000873::IPR025110	AMP-dependent synthetase/ligase::AMP-binding enzyme C-terminal domain
G3_18226	LOC111393400	Oleur061Scf5654g01032	AT4G16110.1	response regulator 2	Q9ZWJ9	Two-component response regulator ARR2	IPR009057::IPR011006::IPR017053	Homeobox domain-like::CheY-like superfamily::Response regulator B-type, plant
G3_29820	LOC111395629	Oleur061Scf5023g00008	AT3G17020.1	Adenine nucleotide alpha hydrolases-like superfamily protein		Unknown protein	IPR006015	Universal stress protein A
G3_99577	LOC111381990	Oleur061Scf4996g00001	AT4G16150.1	calmodulin binding;transcription regulators	O23463	Calmodulin-binding transcription activator 5	IPR000048::IPR005559::IPR013783::IPR014756::IPR020683::IPR027417	IQ motif, EF-hand binding site::CG-1 DNA-binding domain::Immunoglobulin-like fold::Immunoglobulin E-set::Ankyrin repeat-containing domain::P-loop containing nucleoside triphosphate hydrolase
G3_108552	LOC111381990	Oleur061Scf4996g00001	AT4G16150.1	calmodulin binding;transcription regulators	O23463	Calmodulin-binding transcription activator 5	IPR000048::IPR005559::IPR013783::IPR014756::IPR020683::IPR027417	IQ motif, EF-hand binding site::CG-1 DNA-binding domain::Immunoglobulin-like fold::Immunoglobulin E-set::Ankyrin repeat-containing domain::P-loop containing nucleoside triphosphate hydrolase
G3_115686	LOC111393401	Oleur061Scf5654g01028	AT4G16120.1	COBRA-like protein-7 precursor	Q8GZ17	COBRA-like protein 7	IPR006918	COBRA, plant
G3_22870	LOC111373097	Oleur061Scf0653g00005	AT1G48310.1	chromatin remodeling factor18	B4F769	SWI/SNF-related matrix-associated actin-dependent regulator of chromatin subfamily A-like protein 1	IPR000330::IPR001650::IPR027417	SNF2-related, N-terminal domain::Helicase, C-terminal::P-loop containing nucleoside triphosphate hydrolase
G3_55363	LOC111388196	Oleur061Scf1069g03001	AT5G49580.1	Chaperone DnaJ-domain superfamily protein	Q5XIX0	DnaJ homolog subfamily C member 14	IPR001623::IPR032843	DnaJ domain::Cleavage inducing molecular chaperone, Jiv
G3_75046	LOC111373097	Oleur061Scf3577g01012	AT1G48310.1	chromatin remodeling factor18	Q498E7	SWI/SNF-related matrix-associated actin-dependent regulator of chromatin subfamily A-like protein 1	IPR001650::IPR027417	Helicase, C-terminal::P-loop containing nucleoside triphosphate hydrolase
G3_118031	LOC111388196	Oleur061Scf1069g03001	AT5G49580.1	Chaperone DnaJ-domain superfamily protein	Q5XIX0	DnaJ homolog subfamily C member 14	IPR001623::IPR032843	DnaJ domain::Cleavage inducing molecular chaperone, Jiv
G3_193840	LOC111382863	Oleur061Scf0431g02008				Unknown protein
G3_40417	LOC111393619	Oleur061Scf8045g01019	AT4G13980.1	winged-helix DNA-binding transcription factor family protein	Q94BZ5	Heat stress transcription factor A-5	IPR011991::IPR027725	Winged helix-turn-helix DNA-binding domain::Heat shock transcription factor family
G3_67279	LOC111393614	Oleur061Scf8045g02023	AT1G05410.1	Protein of unknown function (DUF1423)	Q9S736	Protein OBERON 1	IPR032881	Oberon, PHD finger domain
G3_111006	LOC111393619	Oleur061Scf8045g01019	AT4G13980.1	winged-helix DNA-binding transcription factor family protein	Q94BZ5	Heat stress transcription factor A-5	IPR011991::IPR027725	Winged helix-turn-helix DNA-binding domain::Heat shock transcription factor family
G3_21428	LOC111393029	Oleur061Scf3060g00005				Unknown protein
G3_90168	LOC111394076	Oleur061Scf7644g01003				Unknown protein
G3_196041	LOC111393029	Oleur061Scf3060g00005				Unknown protein
G3_6054	LOC111394076	Oleur061Scf7644g01003				Unknown protein
G3_40141	LOC111393366	Oleur061Scf0117g04024	AT1G04700.1	PB1 domain-containing protein tyrosine kinase	Q1HKZ5	Mitogen-activated protein kinase kinase kinase 13	IPR000270::IPR011009	PB1 domain::Protein kinase-like domain
G3_59467	LOC111393366	Oleur061Scf2776g04003	AT1G04700.1	PB1 domain-containing protein tyrosine kinase	Q1HKZ5	Mitogen-activated protein kinase kinase kinase 13	IPR000270::IPR011009	PB1 domain::Protein kinase-like domain
G3_53994	LOC111389483	Oleur061Scf0025g06021	AT1G04650.1			Unknown protein	IPR016024::IPR027902	Armadillo-type fold::Protein of unknown function DUF4487
G3_4555	LOC111393640	Oleur061Scf1768g01033	AT5G43900.3	myosin 2	Q9LKB9	Myosin-6	IPR000048::IPR002710::IPR004009::IPR027417	IQ motif, EF-hand binding site::Dilute domain::Myosin, N-terminal, SH3-like::P-loop containing nucleoside triphosphate hydrolase
G3_148124	LOC111393516	Oleur061Scf9163g10008	AT5G65210.2	bZIP transcription factor family protein	Q39237	Transcription factor TGA1	IPR004827::IPR025422	Basic-leucine zipper domain::Transcription factor TGA like domain
G3_23297	LOC111393516	Oleur061Scf9163g10008	AT5G65210.2	bZIP transcription factor family protein	Q39237	Transcription factor TGA1	IPR004827::IPR025422	Basic-leucine zipper domain::Transcription factor TGA like domain
G3_87001	LOC111393343
G3_135781	LOC111412855	Oleur061Scf7092g00004	AT1G52340.1	NAD(P)-binding Rossmann-fold superfamily protein	Q94KL7	Secoisolariciresinol dehydrogenase	IPR002347	Short-chain dehydrogenase/reductase SDR
G3_57177	LOC111393679	Oleur061Scf7934g01006	AT1G08560.1	syntaxin of plants 111	Q42374	Syntaxin-related protein KNOLLE	IPR010989	SNARE
G3_156260	LOC111393704	Oleur061Scf0140g00018	AT3G55760.1			Unknown protein
G3_168638	LOC111378324	Oleur061Scf6596g05010	AT1G05460.1	P-loop containing nucleoside triphosphate hydrolases superfamily protein	Q9BXT6	RNA helicase Mov10l1	IPR014001::IPR026127::IPR027417	Helicase superfamily 1/2, ATP-binding domain::Probable RNA helicase SDE3::P-loop containing nucleoside triphosphate hydrolase
G3_39843	LOC111393687	Oleur061Scf0075g07001	AT3G22290.1	Endoplasmic reticulum vesicle transporter protein	Q803I2	Endoplasmic reticulum-Golgi intermediate compartment protein 3	IPR012936	Endoplasmic reticulum vesicle transporter, C-terminal
G3_107042	LOC111371687	Oleur061Scf3543g00007	AT5G60930.1	P-loop containing nucleoside triphosphate hydrolases superfamily protein	F4K0J3	Kinesin-like protein KIN-4C	IPR001752::IPR027417::IPR033467	Kinesin motor domain::P-loop containing nucleoside triphosphate hydrolase::Tesmin/TSO1-like CXC domain
G3_92140	LOC111371687	Oleur061Scf3543g00007	AT5G60930.1	P-loop containing nucleoside triphosphate hydrolases superfamily protein	F4K0J3	Kinesin-like protein KIN-4C	IPR001752::IPR027417::IPR033467	Kinesin motor domain::P-loop containing nucleoside triphosphate hydrolase::Tesmin/TSO1-like CXC domain
G3_145323	LOC111388310	Oleur061Scf7981g03001	AT1G27730.1	salt tolerance zinc finger	Q96289	Zinc finger protein ZAT10
G3_14670	LOC111392245	Oleur061Scf5241g00012	AT1G76510.3	ARID/BRIGHT DNA-binding domain-containing protein	Q0WNR6	AT-rich interactive domain-containing protein 5	IPR001606::IPR008978	ARID DNA-binding domain::HSP20-like chaperone
G3_44046	LOC111383967	Oleur061Scf9002g00002	AT5G25270.1	Ubiquitin-like superfamily protein		Unknown protein	IPR029071	Ubiquitin-related domain
G3_54864	LOC111383967	Oleur061Scf9002g00002	AT5G25270.1	Ubiquitin-like superfamily protein		Unknown protein	IPR029071	Ubiquitin-related domain
G3_63912	LOC111393197	Oleur061Scf1675g01009				Unknown protein	IPR031625	Sodium channel modifier 1, acidic C-terminal domain
G3_15705	LOC111393895	Oleur061Scf0340g07037	AT4G17330.1	G2484-1 protein		Unknown protein	IPR008395::IPR014002	Agenet-like domain::Agenet domain, plant type
G3_75268	LOC111393895	Oleur061Scf0340g07037	AT4G17330.1	G2484-1 protein		Unknown protein	IPR008395::IPR014002	Agenet-like domain::Agenet domain, plant type
G3_127117	LOC111377751	Oleur061Scf0333g01022	AT4G17640.1	casein kinase II beta chain 2	P40229	Casein kinase II subunit beta'	IPR000704	Casein kinase II, regulatory subunit
G3_92165	LOC111379254	Oleur061Scf4942g02003				Unknown protein
G3_95905	LOC111392692	Oleur061Scf2427g02016	AT1G63680.1	acid-amino acid ligases;ligases;ATP binding;ATP binding;ligases	Q03523	UDP-N-acetylmuramoyl-L-alanyl-D-glutamate--2,6-diaminopimelate ligase	IPR005761	UDP-N-acetylmuramoylalanyl-D-glutamate-2,6-diaminopimelate ligase
G3_98466	LOC111387820	Oleur061Scf7007g02017	AT1G52150.2	Homeobox-leucine zipper family protein / lipid-binding START domain-containing protein	Q6AST1	Homeobox-leucine zipper protein HOX32	IPR009057::IPR013978::IPR023393	Homeobox domain-like::MEKHLA::START-like domain
G3_14736	LOC111372965	Oleur061Scf0291g07006	AT4G11860.1	Protein of unknown function (DUF544)	Q76LS9	Protein FAM63A	IPR007518	MINDY deubiquitinase
G3_65342	LOC111387332	Oleur061Scf0955g01012			Q6AWY4	Growth-regulating factor 5	IPR014978::IPR031137	Glutamine-Leucine-Glutamine, QLQ::Growth-regulating factor
G4_43324	LOC111380331	Oleur061Scf2457g06019	AT5G03960.1	IQ-domain 12		Unknown protein	IPR000048::IPR025064	IQ motif, EF-hand binding site::Domain of unknown function DUF4005
G4_109389	LOC111368512	Oleur061Scf8009g04003	AT5G45775.2	Ribosomal L5P family protein	P46287	60S ribosomal protein L11	IPR022803::IPR031309::IPR031310	Ribosomal protein L5 domain::Ribosomal protein L5, C-terminal::Ribosomal protein L5, N-terminal
G4_54569	LOC111402491	Oleur061Scf3963g01007	AT3G13220.1	ABC-2 type transporter family protein	Q9LK50	ABC transporter G family member 26	IPR003439::IPR013525::IPR027417	ABC transporter-like::ABC-2 type transporter::P-loop containing nucleoside triphosphate hydrolase
G4_140158	LOC111401853	Oleur061Scf0621g00028	AT1G30610.1	pentatricopeptide (PPR) repeat-containing protein	Q9SA76	Pentatricopeptide repeat-containing protein At1g30610, chloroplastic	IPR002885::IPR011990	Pentatricopeptide repeat::Tetratricopeptide-like helical domain
G4_25010	LOC111401841
G4_43840	LOC111384988	Oleur061Scf3765g00024	AT5G47580.1			Unknown protein
G4_68093	LOC111376900	Oleur061Scf8629g00002	AT5G62620.1	Galactosyltransferase family protein	Q9LV16	Hydroxyproline O-galactosyltransferase GALT6	IPR002659::IPR013320	Glycosyl transferase, family 31::Concanavalin A-like lectin/glucanase domain
G4_187858	LOC111376900	Oleur061Scf8629g00002	AT5G62620.1	Galactosyltransferase family protein	Q9LV16	Hydroxyproline O-galactosyltransferase GALT6	IPR002659::IPR013320	Glycosyl transferase, family 31::Concanavalin A-like lectin/glucanase domain
G4_44035	LOC111384988	Oleur061Scf7063g00016	AT5G47580.1			Unknown protein
G4_20452	LOC111384988	Oleur061Scf8629g01010	AT4G32360.1	Pyridine nucleotide-disulphide oxidoreductase family protein	Q8W3L1	NADPH:adrenodoxin oxidoreductase, mitochondrial	IPR016040::IPR023753	NADP-binding domain::FAD/NADP-binding domain
G4_40366	LOC111378183
G4_46313	LOC111373938	Oleur061Scf8994g02035	AT1G29320.1	Transducin/WD40 repeat-like superfamily protein	Q58D06	WD repeat-containing protein 74	IPR015943	WD40/YVTN repeat-like-containing domain
G4_51753	LOC111385012	Oleur061Scf3914g00006	AT3G57520.1	seed imbibition 2	Q5VQG4	Galactinol--sucrose galactosyltransferase	IPR008811::IPR013785	Glycosyl hydrolases 36::Aldolase-type TIM barrel
G4_53215	LOC111385035	Oleur061Scf6826g03009	AT5G50200.3	nitrate transmembrane transporters	Q9FGS5	High-affinity nitrate transporter 3.1	IPR016605	High-affinity nitrate transporter
G4_72343	LOC111385035	Oleur061Scf1036g03001	AT5G50200.3	nitrate transmembrane transporters	Q9FGS5	High-affinity nitrate transporter 3.1	IPR016605	High-affinity nitrate transporter
G4_96114	LOC111385011	Oleur061Scf6826g02028	AT5G63080.1	2-oxoglutarate (2OG) and Fe(II)-dependent oxygenase superfamily protein	Q08BY5	JmjC domain-containing protein 4	IPR003347	JmjC domain
G4_139527	LOC111385012	Oleur061Scf3914g00006	AT3G57520.1	seed imbibition 2	Q5VQG4	Galactinol--sucrose galactosyltransferase	IPR008811::IPR013785	Glycosyl hydrolases 36::Aldolase-type TIM barrel
G4_142080	LOC111378197	Oleur061Scf2311g03012	AT5G63390.1	O-fucosyltransferase family protein		Unknown protein	IPR019378	GDP-fucose protein O-fucosyltransferase
G4_144983	LOC111378183
G4_88360	LOC111390696	Oleur061Scf0678g04007	AT5G20250.4	Raffinose synthase family protein	Q5VQG4	Galactinol--sucrose galactosyltransferase	IPR008811::IPR013785	Glycosyl hydrolases 36::Aldolase-type TIM barrel
G4_120006	LOC111390696	Oleur061Scf0678g04007	AT5G20250.4	Raffinose synthase family protein	Q5VQG4	Galactinol--sucrose galactosyltransferase	IPR008811::IPR013785	Glycosyl hydrolases 36::Aldolase-type TIM barrel
G4_143050	LOC111372137	Oleur061Scf4349g00021			Q93ZR6	O-acyltransferase WSD1	IPR004255	O-acyltransferase, WSD1, N-terminal
G4_165815	LOC111371908	Oleur061Scf4452g02023	AT3G58110.1			Unknown protein
G4_108525	LOC111383651	Oleur061Scf4452g01017	AT2G42570.1	TRICHOME BIREFRINGENCE-LIKE 39	Q9SIN2	Protein trichome birefringence-like 39	IPR025846::IPR026057	PMR5 N-terminal domain::PC-Esterase
G4_71788	LOC111383656	Oleur061Scf4452g00032	AT3G58610.1	ketol-acid reductoisomerase	Q05758	Ketol-acid reductoisomerase, chloroplastic	IPR013023::IPR016040	Ketol-acid reductoisomerase::NADP-binding domain
G4_99620	LOC111372069	Oleur061Scf0238g00004	AT2G42600.2	phosphoenolpyruvate carboxylase 2	Q01647	Phosphoenolpyruvate carboxylase	IPR021135::IPR033129	Phosphoenolpyruvate carboxylase::Phosphoenolpyruvate carboxylase, His active site
G4_57264	LOC111374178	Oleur061Scf3289g02020				Unknown protein
G4_129950	LOC111393479	Oleur061Scf2750g01013	AT1G53210.1	sodium/calcium exchanger family protein / calcium-binding EF hand family protein		Unknown protein	IPR004837::IPR011992	Sodium/calcium exchanger membrane region::EF-hand domain pair
G4_133383	LOC111393458	Oleur061Scf8046g01020	AT3G15510.1	NAC domain containing protein 2	A0SPJ6	NAC transcription factor NAM-B2	IPR003441	NAC domain
G4_156046	LOC111387907	Oleur061Scf4643g01055	AT1G12050.1	fumarylacetoacetase, putative	A5PKH3	Fumarylacetoacetase	IPR005959::IPR011234	Fumarylacetoacetase::Fumarylacetoacetase, C-terminal-related
G4_15340	LOC111384090	Oleur061Scf1293g01049	AT4G05000.1	Vacuolar protein sorting-associated protein VPS28 family protein	Q9S9T7	Vacuolar protein sorting-associated protein 28 homolog 2	IPR007143	Vacuolar protein sorting-associated, VPS28
G4_78460	LOC111368742	Oleur061Scf6602g02045	AT5G66410.1	phosducin-like protein 3 homolog	Q8LCV1	Thioredoxin domain-containing protein PLP3B	IPR012336	Thioredoxin-like fold
G4_173566	LOC111374977	Oleur061Scf2884g02028	AT1G04760.1	vesicle-associated membrane protein 726	Q9ZTW3	Vesicle-associated membrane protein 721	IPR001388::IPR011012	Synaptobrevin::Longin-like domain
G5_143737	LOC111403222	Oleur061Scf6024g17012	AT1G14900.1	high mobility group A	Q43386	HMG-Y-related protein A	IPR011991::IPR017956::IPR031059	Winged helix-turn-helix DNA-binding domain::AT hook, DNA-binding motif::High mobility group protein HMGA, plant
G5_145795	LOC111403218	Oleur061Scf0897g01005				Unknown protein
G5_34159	LOC111403218	Oleur061Scf0897g01005				Unknown protein
G5_5299	LOC111403016	Oleur061Scf0029g06009	AT2G38640.1	Protein of unknown function (DUF567)	A0MFL4	Protein LURP-one-related 17	IPR025659	Tubby C-terminal-like domain
G5_88876	LOC111378449	Oleur061Scf2654g00028	AT3G05060.1	NOP56-like pre RNA processing ribonucleoprotein	Q9Y2X3	Nucleolar protein 58	IPR002687::IPR011004::IPR012974::IPR012976::IPR029044	Nop domain::Trimeric LpxA-like::NOP5, N-terminal::NOSIC::Nucleotide-diphospho-sugar transferases
G5_6437	LOC111403411	Oleur061Scf2231g06020	AT2G33550.1	Homeodomain-like superfamily protein	Q8VZ20	Trihelix transcription factor ASR3	IPR009057	Homeobox domain-like
G5_78912	LOC111403474	Oleur061Scf2654g00042	AT3G49410.1	Transcription factor IIIC, subunit 5	Q9Y5Q8	General transcription factor 3C polypeptide 5	IPR019136	Transcription factor IIIC, subunit 5
G5_90677	LOC111403472	Oleur061Scf7769g00073	AT2G43900.1	Endonuclease/exonuclease/phosphatase family protein	O80560	Type I inositol polyphosphate 5-phosphatase 12	IPR005135::IPR015943	Endonuclease/exonuclease/phosphatase::WD40/YVTN repeat-like-containing domain
G5_141589	LOC111403399	Oleur061Scf2231g04035				Unknown protein
G5_176315	LOC111403357	Oleur061Scf2231g02007	AT1G27300.1			Unknown protein
G5_179586	LOC111373771	Oleur061Scf8424g00005	AT1G24510.1	TCP-1/cpn60 chaperonin family protein	O04450	T-complex protein 1 subunit epsilon	IPR002423::IPR027409::IPR027413	Chaperonin Cpn60/TCP-1 family::GroEL-like apical domain::GroEL-like equatorial domain
G5_17169	LOC111403357	Oleur061Scf2231g02007	AT1G27300.1			Unknown protein
G5_58283	LOC111373771	Oleur061Scf8424g00005	AT1G24510.1	TCP-1/cpn60 chaperonin family protein	O04450	T-complex protein 1 subunit epsilon	IPR002423::IPR027409::IPR027413	Chaperonin Cpn60/TCP-1 family::GroEL-like apical domain::GroEL-like equatorial domain
G5_79736	LOC111403405	Oleur061Scf7771g00002	AT3G27010.1	TEOSINTE BRANCHED 1, cycloidea, PCF (TCP)-domain family protein 20	Q9LSD5	Transcription factor TCP20	IPR005333	Transcription factor, TCP
G5_150249	LOC111403405	Oleur061Scf7771g00002	AT3G27010.1	TEOSINTE BRANCHED 1, cycloidea, PCF (TCP)-domain family protein 20	Q9LSD5	Transcription factor TCP20	IPR005333	Transcription factor, TCP
G5_150403	LOC111403357	Oleur061Scf2231g02007	AT1G27300.1			Unknown protein
G5_6431	LOC111367348	Oleur061Scf0367g03037	AT1G76710.1	SET domain group 26	Q84WW6	Histone-lysine N-methyltransferase ASHH1
G5_22034	LOC111367346	Oleur061Scf0367g04003	AT2G43430.1	glyoxalase 2-1	Q0AM20	Hydroxyacylglutathione hydrolase	IPR017782::IPR032282	Hydroxyacylglutathione hydrolase::Hydroxyacylglutathione hydrolase, C-terminal domain
G5_41685	LOC111367348	Oleur061Scf1601g02011	AT1G76710.1	SET domain group 26	Q84WW6	Histone-lysine N-methyltransferase ASHH1	IPR001214::IPR003616::IPR006560	SET domain::Post-SET domain::AWS domain
G5_95062	LOC111382281	Oleur061Scf5772g01040	AT1G48210.1	Protein kinase superfamily protein	Q8H1G6	PTI1-like tyrosine-protein kinase 1
G5_143762	LOC111367346	Oleur061Scf2931g00022	AT2G43430.1	glyoxalase 2-1	Q0AM20	Hydroxyacylglutathione hydrolase	IPR017782::IPR032282	Hydroxyacylglutathione hydrolase::Hydroxyacylglutathione hydrolase, C-terminal domain
G5_17290	LOC111392598	Oleur061Scf5772g01044				Unknown protein
G5_32302	LOC111403474	Oleur061Scf2654g00042	AT3G49410.1	Transcription factor IIIC, subunit 5	Q9Y5Q8	General transcription factor 3C polypeptide 5	IPR019136	Transcription factor IIIC, subunit 5
G5_97953	LOC111381601	Oleur061Scf1042g05064	AT5G20350.1	Ankyrin repeat family protein with DHHC zinc finger domain	Q52T38	Protein S-acyltransferase 24	IPR001594::IPR020683	Palmitoyltransferase, DHHC domain::Ankyrin repeat-containing domain
G5_181950	LOC111382283	Oleur061Scf5772g00015	AT1G65430.1	IBR domain-containing protein	Q9P3U4	E3 ubiquitin-protein ligase dbl4	IPR001876::IPR002867::IPR013083::IPR031127	Zinc finger, RanBP2-type::IBR domain::Zinc finger, RING/FYVE/PHD-type::E3 ubiquitin ligase RBR family
G5_28215	LOC111403421	Oleur061Scf3246g00030	AT3G57650.1	lysophosphatidyl acyltransferase 2	Q9SYC8	1-acyl-sn-glycerol-3-phosphate acyltransferase 3	IPR002123::IPR032098	Phospholipid/glycerol acyltransferase::Acyltransferase, C-terminal domain
G5_121939	LOC111403421	Oleur061Scf0765g00022	AT3G57650.1	lysophosphatidyl acyltransferase 2	Q9SYC8	1-acyl-sn-glycerol-3-phosphate acyltransferase 3	IPR002123::IPR032098	Phospholipid/glycerol acyltransferase::Acyltransferase, C-terminal domain
G5_4546	LOC111403509	Oleur061Scf2439g01003	AT3G44590.2	60S acidic ribosomal protein family	P41099	60S acidic ribosomal protein P2	IPR027534	Ribosomal protein L12 family
G5_149585	LOC111403502	Oleur061Scf5797g06001	AT4G36690.1	U2 snRNP auxilliary factor, large subunit, splicing factor	Q9ZR40	Splicing factor U2af large subunit B	IPR006529	U2 snRNP auxilliary factor, large subunit, splicing factor
G5_66659	LOC111386701	Oleur061Scf7610g02015	AT1G08130.1	DNA ligase 1	Q42572	DNA ligase 1	IPR000977::IPR012340	DNA ligase, ATP-dependent::Nucleic acid-binding, OB-fold
G5_93275	LOC111386701	Oleur061Scf7610g02015	AT1G08130.1	DNA ligase 1	Q42572	DNA ligase 1	IPR000977::IPR012340	DNA ligase, ATP-dependent::Nucleic acid-binding, OB-fold
G5_41061	LOC111403495	Oleur061Scf7078g03002	AT3G53030.1	ser/arg-rich protein kinase 4	P36616	Protein kinase dsk1	IPR011009	Protein kinase-like domain
G5_45183	LOC111403502	Oleur061Scf5797g06001	AT4G36690.1	U2 snRNP auxilliary factor, large subunit, splicing factor	Q9ZR40	Splicing factor U2af large subunit B	IPR006529	U2 snRNP auxilliary factor, large subunit, splicing factor
G5_11813	LOC111403438	Oleur061Scf1791g06002	AT5G22000.2	RING-H2 group F2A	Q9ZT42	E3 ubiquitin-protein ligase RHF2A	IPR013083	Zinc finger, RING/FYVE/PHD-type
G5_7308	LOC111403438	Oleur061Scf2578g00031	AT5G22000.2	RING-H2 group F2A	Q9ZT42	E3 ubiquitin-protein ligase RHF2A	IPR013083	Zinc finger, RING/FYVE/PHD-type
G5_7367	LOC111382117	Oleur061Scf7002g01051				Unknown protein
G5_23207	LOC111398043	Oleur061Scf4561g00014	AT2G27040.1	Argonaute family protein	Q9ZVD5	Protein argonaute 4	IPR003100::IPR014811::IPR032472::IPR032474	PAZ domain::Argonaute, linker 1 domain::Argonaute linker 2 domain::Protein argonaute, N-terminal
G5_26064	LOC111383568
G5_30095	LOC111386662	Oleur061Scf3876g00026	AT2G26930.1	4-(cytidine 5'-phospho)-2-C-methyl-D-erithritol kinase	P56848	4-diphosphocytidyl-2-C-methyl-D-erythritol kinase, chloroplastic	IPR004424	4-diphosphocytidyl-2C-methyl-D-erythritol kinase
G5_46960	LOC111382117	Oleur061Scf7002g01051				Unknown protein
G5_199594	LOC111386662	Oleur061Scf3876g00026	AT2G26930.1	4-(cytidine 5'-phospho)-2-C-methyl-D-erithritol kinase	P56848	4-diphosphocytidyl-2-C-methyl-D-erythritol kinase, chloroplastic	IPR004424	4-diphosphocytidyl-2C-methyl-D-erythritol kinase
G5_12069	LOC111398043	Oleur061Scf4561g00014	AT2G27040.1	Argonaute family protein	Q9ZVD5	Protein argonaute 4	IPR003100::IPR014811::IPR032472::IPR032474	PAZ domain::Argonaute, linker 1 domain::Argonaute linker 2 domain::Protein argonaute, N-terminal
G5_17659	LOC111404907	Oleur061Scf5797g06018	AT4G25470.1	C-repeat/DRE binding factor 2	Q8S9Z5	Dehydration-responsive element-binding protein 1F	IPR016177	DNA-binding domain
G5_72334	LOC111404907	Oleur061Scf5797g06018	AT4G25470.1	C-repeat/DRE binding factor 2	Q8S9Z5	Dehydration-responsive element-binding protein 1F	IPR016177	DNA-binding domain
G5_10302	LOC111403509	Oleur061Scf2439g01003	AT3G44590.2	60S acidic ribosomal protein family	P41099	60S acidic ribosomal protein P2	IPR027534	Ribosomal protein L12 family
G5_136110	LOC111403502	Oleur061Scf0506g01015	AT4G36690.1	U2 snRNP auxilliary factor, large subunit, splicing factor	Q9ZR40	Splicing factor U2af large subunit B	IPR006529	U2 snRNP auxilliary factor, large subunit, splicing factor
G5_121494	LOC111403519	Oleur061Scf3715g00030	AT2G27460.1	sec23/sec24 transport family protein	Q758M7	Protein transport protein SEC23	IPR002035::IPR006895::IPR006896::IPR006900	von Willebrand factor, type A::Zinc finger, Sec23/Sec24-type::Sec23/Sec24, trunk domain::Sec23/Sec24, helical domain
G5_29890	LOC111403552	Oleur061Scf3172g00019	AT5G60680.1	Protein of unknown function, DUF584		Unknown protein	IPR007608	Senescence regulator S40
G5_21416	LOC111403553	Oleur061Scf1515g02009	AT3G62660.1	galacturonosyltransferase-like 7		Unknown protein	IPR002495::IPR029044	Glycosyl transferase, family 8::Nucleotide-diphospho-sugar transferases
G5_87864	LOC111404516	Oleur061Scf9143g02017	AT3G62770.1	Transducin/WD40 repeat-like superfamily protein	Q93VB2	Autophagy-related protein 18a	IPR015943	WD40/YVTN repeat-like-containing domain
G5_178082	LOC111404516	Oleur061Scf9143g02017	AT3G62770.1	Transducin/WD40 repeat-like superfamily protein	Q93VB2	Autophagy-related protein 18a	IPR015943	WD40/YVTN repeat-like-containing domain
G5_91846	LOC111383891	Oleur061Scf0350g01015	AT3G54650.1	RNI-like superfamily protein	Q8W104	F-box/LRR-repeat protein 17	IPR001810::IPR032675	F-box domain::Leucine-rich repeat domain, L domain-like
G5_44573	LOC111373304	Oleur061Scf3739g00028	AT4G14340.1	casein kinase I	P42158	Casein kinase I isoform delta-like	IPR011009	Protein kinase-like domain
G5_102608	LOC111403677	Oleur061Scf1274g01044	AT1G16830.1	Pentatricopeptide repeat (PPR) superfamily protein	Q9FIX3	Pentatricopeptide repeat-containing protein At5g39710	IPR002885::IPR011990	Pentatricopeptide repeat::Tetratricopeptide-like helical domain
G5_16061	LOC111403677	Oleur061Scf1274g01044	AT1G16830.1	Pentatricopeptide repeat (PPR) superfamily protein	Q9FIX3	Pentatricopeptide repeat-containing protein At5g39710	IPR002885::IPR011990	Pentatricopeptide repeat::Tetratricopeptide-like helical domain
G5_33284	LOC111403684	Oleur061Scf2554g03009				Unknown protein
G5_295	LOC111403684	Oleur061Scf0431g02003				Unknown protein
G5_22236	LOC111403684	Oleur061Scf2554g03009				Unknown protein
G5_25555	LOC111403722	Oleur061Scf1521g00008	AT5G35200.1	ENTH/ANTH/VHS superfamily protein	Q9ZVN6	Clathrin coat assembly protein AP180	IPR008942::IPR011417	ENTH/VHS::AP180 N-terminal homology ANTH domain
G5_30506	LOC111403723	Oleur061Scf9155g04008	AT4G30470.1	NAD(P)-binding Rossmann-fold superfamily protein	P51110	Dihydroflavonol-4-reductase	IPR016040	NADP-binding domain
G5_75620	LOC111403722	Oleur061Scf9155g04010	AT5G35200.1	ENTH/ANTH/VHS superfamily protein	Q9ZVN6	Clathrin coat assembly protein AP180	IPR008942::IPR011417	ENTH/VHS::AP180 N-terminal homology ANTH domain
G5_10535	LOC111403722	Oleur061Scf1521g00008	AT5G35200.1	ENTH/ANTH/VHS superfamily protein	Q9ZVN6	Clathrin coat assembly protein AP180	IPR008942::IPR011417	ENTH/VHS::AP180 N-terminal homology ANTH domain
G5_29427	LOC111384867	Oleur061Scf9155g01012	AT5G57770.1	Plant protein of unknown function (DUF828) with plant pleckstrin homology-like region		Unknown protein	IPR008546::IPR013666	Domain of unknown function DUF828::Pleckstrin-like, plant
G5_29869	LOC111403722	Oleur061Scf1521g00008	AT5G35200.1	ENTH/ANTH/VHS superfamily protein	Q9ZVN6	Clathrin coat assembly protein AP180	IPR008942::IPR011417	ENTH/VHS::AP180 N-terminal homology ANTH domain
G5_66566	LOC111403723	Oleur061Scf9155g04008	AT4G30470.1	NAD(P)-binding Rossmann-fold superfamily protein	P51110	Dihydroflavonol-4-reductase	IPR016040	NADP-binding domain
G5_68266	LOC111403722	Oleur061Scf1521g00008	AT5G35200.1	ENTH/ANTH/VHS superfamily protein	Q9ZVN6	Clathrin coat assembly protein AP180	IPR008942::IPR011417	ENTH/VHS::AP180 N-terminal homology ANTH domain
G5_173681	LOC111403730	Oleur061Scf9155g03003	AT2G23810.1	tetraspanin8	Q8S8Q6	Tetraspanin-8	IPR018499	Tetraspanin/Peripherin
G5_37257	LOC111403778	Oleur061Scf2441g01006				Unknown protein	IPR003604	Matrin/U1-C-like, C2H2-type zinc finger
G5_121434	LOC111403778	Oleur061Scf2441g01006				Unknown protein	IPR003604	Matrin/U1-C-like, C2H2-type zinc finger
G5_66604	LOC111403773	Oleur061Scf9145g06001	AT2G24220.1	purine permease 5	Q9FZ96	Purine permease 1	IPR030182	Purine permease, plant
G6_13419	LOC111392087	Oleur061Scf0767g10025	AT2G43330.1	inositol transporter 1	Q8VZR6	Inositol transporter 1	IPR005828::IPR020846	Major facilitator, sugar transporter-like::Major facilitator superfamily domain
G6_14938	LOC111390752	Oleur061Scf0954g02005	AT5G58760.1	damaged DNA binding 2	Q6NQ88	Protein DAMAGED DNA-BINDING 2	IPR015943	WD40/YVTN repeat-like-containing domain
G6_29673	LOC111390752	Oleur061Scf0954g02005	AT5G58760.1	damaged DNA binding 2	Q6NQ88	Protein DAMAGED DNA-BINDING 2	IPR015943	WD40/YVTN repeat-like-containing domain
G6_57081	LOC111392087	Oleur061Scf0767g10025	AT2G43330.1	inositol transporter 1	Q8VZR6	Inositol transporter 1	IPR005828::IPR020846	Major facilitator, sugar transporter-like::Major facilitator superfamily domain
G6_135483	LOC111390760	Oleur061Scf7601g00004	AT2G43500.1	Plant regulator RWP-RK family protein	O22864	Protein NLP8	IPR000270::IPR003035	PB1 domain::RWP-RK domain
G6_22983	LOC111369869
G6_48569	LOC111369962	Oleur061Scf0767g03015	AT3G07910.1			Unknown protein	IPR018450	Romo1/Mgr2
G6_35722	LOC111388666	Oleur061Scf0678g00007	AT4G25470.1	C-repeat/DRE binding factor 2	Q9SYS6	Dehydration-responsive element-binding protein 1C	IPR016177	DNA-binding domain
G6_50477	LOC111372541	Oleur061Scf7395g00007	AT3G53030.1	ser/arg-rich protein kinase 4	P36616	Protein kinase dsk1	IPR011009	Protein kinase-like domain
G6_72397	LOC111383083	Oleur061Scf4667g01055	AT2G27350.5	OTU-like cysteine protease family protein	Q3U2S4	OTU domain-containing protein 5	IPR003323::IPR031084	OTU domain::OTU domain-containing protein 5/Otubain-like deubiquitinase 1
G6_27122	LOC111383081	Oleur061Scf0894g00021	AT2G27200.1	P-loop containing nucleoside triphosphate hydrolases superfamily protein	Q10190	Large subunit GTPase 1	IPR027417	P-loop containing nucleoside triphosphate hydrolase
G6_34952	LOC111372541	Oleur061Scf7395g00007	AT3G53030.1	ser/arg-rich protein kinase 4	P36616	Protein kinase dsk1	IPR011009	Protein kinase-like domain
G6_40814	LOC111369864	Oleur061Scf0117g01009	AT3G06720.1	importin alpha isoform 1	O22478	Importin subunit alpha	IPR002652::IPR016024::IPR032413	Importin-alpha, importin-beta-binding domain::Armadillo-type fold::Atypical Arm repeat
G6_54283	LOC111369873	Oleur061Scf7669g00013	AT4G16143.1	importin alpha isoform 2	O22478	Importin subunit alpha	IPR016024::IPR032413	Armadillo-type fold::Atypical Arm repeat
G6_62383	LOC111369864	Oleur061Scf1447g02026	AT3G06720.1	importin alpha isoform 1	O22478	Importin subunit alpha	IPR002652::IPR016024	Importin-alpha, importin-beta-binding domain::Armadillo-type fold
G6_66342	LOC111369860	Oleur061Scf7811g00011	AT4G16100.1	Protein of unknown function (DUF789)		Unknown protein	IPR008507	Protein of unknown function DUF789
G6_71046	LOC111383070	Oleur061Scf9155g08029	AT5G22040.1			Unknown protein
G6_86799	LOC111369167	Oleur061Scf8848g00043				Unknown protein
G6_104107	LOC111383070	Oleur061Scf9155g08029	AT5G22040.1			Unknown protein
G6_198965	LOC111372541	Oleur061Scf7395g00007	AT3G53030.1	ser/arg-rich protein kinase 4	P36616	Protein kinase dsk1	IPR011009	Protein kinase-like domain
G6_61533	LOC111369167	Oleur061Scf4702g02001			Q6TXD2	Pelargonidin 3-O-(6-caffeoylglucoside) 5-O-(6-O-malonylglucoside) 4'''-malonyltransferase	IPR003480	Transferase
G6_145501	LOC111369843	Oleur061Scf3856g00038				Unknown protein
G6_34146	LOC111369243	Oleur061Scf7622g02009	AT2G47810.1	nuclear factor Y, subunit B5	P25209	Nuclear transcription factor Y subunit B	IPR009072	Histone-fold
G6_41187	LOC111369816	Oleur061Scf1358g00012	AT2G48060.1		F4IN58	Piezo-type mechanosensitive ion channel homolog	IPR027272	Piezo family
G6_51025	LOC111369816
G6_56082	LOC111369881	Oleur061Scf5212g00017	AT3G06260.1	galacturonosyltransferase-like 4		Unknown protein	IPR002495::IPR029044	Glycosyl transferase, family 8::Nucleotide-diphospho-sugar transferases
G6_59151	LOC111369816
G6_156607	LOC111369816
G6_167495	LOC111369816
G6_149436	LOC111369777	Oleur061Scf2923g00002	AT1G07110.1	fructose-2,6-bisphosphatase	Q9MB58	6-phosphofructo-2-kinase/fructose-2,6-bisphosphatase	IPR003094::IPR013783::IPR013784::IPR027417	Fructose-2,6-bisphosphatase::Immunoglobulin-like fold::Carbohydrate-binding-like fold::P-loop containing nucleoside triphosphate hydrolase
G6_72427	LOC111374666	Oleur061Scf8067g03018				Unknown protein
G6_73006	LOC111374666	Oleur061Scf8067g03018				Unknown protein
G6_19068	LOC111369729	Oleur061Scf0652g01004	AT1G07030.1	Mitochondrial substrate carrier family protein	Q55DY8	Mitoferrin	IPR002067::IPR009395::IPR023395	Mitochondrial carrier protein::Biogenesis of lysosome-related organelles complex 1 subunit 1::Mitochondrial carrier domain
G6_11229	LOC111369729	Oleur061Scf0652g01004	AT1G07030.1	Mitochondrial substrate carrier family protein	Q55DY8	Mitoferrin	IPR002067::IPR009395::IPR023395	Mitochondrial carrier protein::Biogenesis of lysosome-related organelles complex 1 subunit 1::Mitochondrial carrier domain
G6_18441	LOC111369093	Oleur061Scf1723g00010	AT4G32010.1	HSI2-like 1	Q5CCK4	B3 domain-containing transcription repressor VAL2
G6_27094	LOC111369712	Oleur061Scf0652g04004	AT1G57610.1	Protein of unknown function (DUF607)	Q8VYR0	Calcium uniporter protein 5, mitochondrial	IPR006769	Coiled-coil domain containing protein 109, C-terminal
G6_60534	LOC111369093	Oleur061Scf6978g00003	AT2G30470.1	high-level expression of sugar-inducible gene 2	Q8W4L5	B3 domain-containing transcription repressor VAL1	IPR011124	Zinc finger, CW-type
G6_71183	LOC111369719	Oleur061Scf0974g00030				Unknown protein	IPR009057	Homeobox domain-like
G6_90559	LOC111369719	Oleur061Scf0974g00030				Unknown protein	IPR009057	Homeobox domain-like
G6_62805	LOC111369754	Oleur061Scf1100g02007	AT1G04020.1	breast cancer associated RING 1	F4I443	BRCA1-associated RING domain protein 1	IPR001357::IPR013083::IPR031099	BRCT domain::Zinc finger, RING/FYVE/PHD-type::BRCA1-associated
G6_63513	LOC111369754	Oleur061Scf8697g00009	AT1G04020.1	breast cancer associated RING 1	F4I443	BRCA1-associated RING domain protein 1	IPR001357::IPR013083::IPR031099	BRCT domain::Zinc finger, RING/FYVE/PHD-type::BRCA1-associated
G6_161377	LOC111369702	Oleur061Scf1074g02026	AT3G46980.3	phosphate transporter 4;3	O82390	Sodium-dependent phosphate transport protein 1, chloroplastic	IPR011701::IPR020846	Major facilitator superfamily::Major facilitator superfamily domain
G6_110776	LOC111369702	Oleur061Scf1074g02026	AT3G46980.3	phosphate transporter 4;3	O82390	Sodium-dependent phosphate transport protein 1, chloroplastic	IPR011701::IPR020846	Major facilitator superfamily::Major facilitator superfamily domain
G6_144744	LOC111369677	Oleur061Scf5732g00011				Unknown protein
G6_168516	LOC111369668	Oleur061Scf2342g10015	AT3G46740.1	translocon at the outer envelope membrane of chloroplasts 75-III	Q43715	Protein TOC75, chloroplastic	IPR000184::IPR005689	Bacterial surface antigen D15::Chloroplast envelope protein translocase, IAP75
G6_6055	LOC111369677	Oleur061Scf5732g00011				Unknown protein
G6_32781	LOC111369666	Oleur061Scf6112g02008	AT5G59250.1	Major facilitator superfamily protein	Q0WWW9	D-xylose-proton symporter-like 3, chloroplastic	IPR005828::IPR020846	Major facilitator, sugar transporter-like::Major facilitator superfamily domain
G6_86925	LOC111369664	Oleur061Scf6112g02007	AT2G29210.1	splicing factor PWI domain-containing protein	Q5ZMJ9	Serine/arginine repetitive matrix protein 1	IPR002483	PWI domain
G6_125522	LOC111369668	Oleur061Scf6112g01001	AT3G46740.1	translocon at the outer envelope membrane of chloroplasts 75-III	Q43715	Protein TOC75, chloroplastic	IPR000184::IPR005689	Bacterial surface antigen D15::Chloroplast envelope protein translocase, IAP75
G6_9939	LOC111389013	Oleur061Scf2813g10009	AT1G04280.1	P-loop containing nucleoside triphosphate hydrolases superfamily protein		Unknown protein	IPR010488::IPR027417	Zeta toxin domain::P-loop containing nucleoside triphosphate hydrolase
G6_31583	LOC111369615	Oleur061Scf4222g01033	AT5G02960.1	Ribosomal protein S12/S23 family protein	P46297	40S ribosomal protein S23	IPR006032	Ribosomal protein S12/S23
G6_51006	LOC111389013	Oleur061Scf2813g10009	AT1G04280.1	P-loop containing nucleoside triphosphate hydrolases superfamily protein		Unknown protein	IPR010488::IPR027417	Zeta toxin domain::P-loop containing nucleoside triphosphate hydrolase
G6_104440	LOC111369615	Oleur061Scf4222g01033	AT5G02960.1	Ribosomal protein S12/S23 family protein	P46297	40S ribosomal protein S23	IPR006032	Ribosomal protein S12/S23
G6_124332	LOC111369616	Oleur061Scf4222g01025	AT5G60210.1	ROP interactive partner 5	Q9LSS5	Interactor of constitutive active ROPs 3	IPR029688	Interactor of constitutive active ROPs
G6_132374	LOC111369483	Oleur061Scf2813g14005	AT4G14350.1	AGC (cAMP-dependent, cGMP-dependent and protein kinase C) kinase family protein	Q9Y2H1	Serine/threonine-protein kinase 38-like	IPR000961::IPR011009::IPR011993	AGC-kinase, C-terminal::Protein kinase-like domain::PH domain-like
G6_99207	LOC111369483	Oleur061Scf2813g14005	AT4G14350.1	AGC (cAMP-dependent, cGMP-dependent and protein kinase C) kinase family protein	Q9Y2H1	Serine/threonine-protein kinase 38-like	IPR000961::IPR011009::IPR011993	AGC-kinase, C-terminal::Protein kinase-like domain::PH domain-like
G6_88473	LOC111385954	Oleur061Scf0275g05006	AT5G43790.1	Pentatricopeptide repeat (PPR) superfamily protein	Q9FG85	Pentatricopeptide repeat-containing protein At5g43790	IPR002885::IPR011990::IPR032867	Pentatricopeptide repeat::Tetratricopeptide-like helical domain::DYW domain
G6_11053	LOC111369496	Oleur061Scf0275g06016				Unknown protein	IPR000504	RNA recognition motif domain
G6_30592	LOC111385954	Oleur061Scf1114g00008	AT4G21065.1	Tetratricopeptide repeat (TPR)-like superfamily protein	A8MQA3	Pentatricopeptide repeat-containing protein At4g21065	IPR002885::IPR011990::IPR032867	Pentatricopeptide repeat::Tetratricopeptide-like helical domain::DYW domain
G6_8084	LOC111369489	Oleur061Scf6764g01006	AT3G23580.1	ribonucleotide reductase 2A	P49730	Ribonucleoside-diphosphate reductase small chain	IPR000358::IPR009078::IPR030475	Ribonucleotide reductase small subunit family::Ferritin-like superfamily::Ribonucleotide reductase small subunit, acitve site
G6_68736	LOC111369390	Oleur061Scf0909g00001	AT3G53360.1	Tetratricopeptide repeat (TPR)-like superfamily protein	Q9LFI1	Pentatricopeptide repeat-containing protein At3g53360, mitochondrial	IPR002885::IPR011990	Pentatricopeptide repeat::Tetratricopeptide-like helical domain
G6_105488	LOC111369208	Oleur061Scf1717g02011	AT5G60770.1	nitrate transporter 2.4	Q9LMZ9	High-affinity nitrate transporter 2.2	IPR011701::IPR020846	Major facilitator superfamily::Major facilitator superfamily domain
G6_39826	LOC111385141	Oleur061Scf8260g00003	AT3G09470.1	Major facilitator superfamily protein	Q86WB7	Protein unc-93 homolog A	IPR010291::IPR020846	Ion channel regulatory protein, UNC-93::Major facilitator superfamily domain
G6_76716	LOC111385113	Oleur061Scf9160g00003	AT5G02310.1	proteolysis 6	F4KCC2	E3 ubiquitin-protein ligase PRT6	IPR003126	Zinc finger, UBR-type
G6_135868	LOC111385124	Oleur061Scf9160g00004	AT2G37650.1	GRAS family transcription factor	O80933	Scarecrow-like protein 9	IPR005202	Transcription factor GRAS
G6_76287	LOC111385124	Oleur061Scf9160g00004	AT2G37650.1	GRAS family transcription factor	O80933	Scarecrow-like protein 9	IPR005202	Transcription factor GRAS
G6_61318	LOC111403195	Oleur061Scf4494g00024	AT2G01190.1	Octicosapeptide/Phox/Bem1p family protein		Unknown protein	IPR000270	PB1 domain
G6_24683	LOC111385155	Oleur061Scf0932g00014	AT2G29530.3	Tim10/DDP family zinc finger protein	Q9ZW33	Mitochondrial import inner membrane translocase subunit TIM10	IPR004217	Tim10/DDP family zinc finger
G6_97712	LOC111369339	Oleur061Scf8470g02016	AT1G68320.1	myb domain protein 62	Q9LDE1	Transcription factor MYB108	IPR009057	Homeobox domain-like
G6_2857	LOC111369348	Oleur061Scf2021g00003	AT1G66150.1	transmembrane kinase 1	P43298	Receptor protein kinase TMK1	IPR001611::IPR003591::IPR011009::IPR013210::IPR013320::IPR025875::IPR032675	Leucine-rich repeat::Leucine-rich repeat, typical subtype::Protein kinase-like domain::Leucine-rich repeat-containing N-terminal, plant-type::Concanavalin A-like lectin/glucanase domain::Leucine rich repeat 4::Leucine-rich repeat domain, L domain-like
G6_133416	LOC111378224	Oleur061Scf8196g00002	AT1G23230.1		F4I4P3	Mediator of RNA polymerase II transcription subunit 23	IPR021629	Mediator complex, subunit Med23
G6_41612	LOC111376545	Oleur061Scf0314g04019	AT5G24740.1	Protein of unknown function (DUF1162)	Q5H8C4	Vacuolar protein sorting-associated protein 13A	IPR009543::IPR026847::IPR031645	Vacuolar protein sorting-associated protein 13, SHR-binding domain::Vacuolar protein sorting-associated protein 13::Vacuolar protein sorting-associated protein 13, C-terminal
G6_129278	LOC111392956	Oleur061Scf1330g01011	AT2G38370.1	Plant protein of unknown function (DUF827)	O48724	Protein WEAK CHLOROPLAST MOVEMENT UNDER BLUE LIGHT 1	IPR008545	WEB family
G6_60873	LOC111392532	Oleur061Scf3973g00001	AT1G45616.1	receptor like protein 6	P93194	Receptor-like protein kinase	IPR001611::IPR003591::IPR013210::IPR032675	Leucine-rich repeat::Leucine-rich repeat, typical subtype::Leucine-rich repeat-containing N-terminal, plant-type::Leucine-rich repeat domain, L domain-like
G6_28745	LOC111380270	Oleur061Scf5453g00005				Unknown protein
G6_39709	LOC111392956	Oleur061Scf1330g01011	AT2G38370.1	Plant protein of unknown function (DUF827)	O48724	Protein WEAK CHLOROPLAST MOVEMENT UNDER BLUE LIGHT 1	IPR008545	WEB family
G6_46057	LOC111392543	Oleur061Scf7535g00031	AT5G01340.1	Mitochondrial substrate carrier family protein	Q9M038	Mitochondrial succinate-fumarate transporter 1	IPR018108::IPR023395	Mitochondrial substrate/solute carrier::Mitochondrial carrier domain
G6_104165	LOC111392543	Oleur061Scf1032g02004	AT5G01340.1	Mitochondrial substrate carrier family protein	Q9M038	Mitochondrial succinate-fumarate transporter 1	IPR018108::IPR023395	Mitochondrial substrate/solute carrier::Mitochondrial carrier domain
G6_114072	LOC111392555	Oleur061Scf7535g00004	AT1G49000.1			Unknown protein
G6_52776	LOC111392532	Oleur061Scf3973g00001	AT1G45616.1	receptor like protein 6	P93194	Receptor-like protein kinase	IPR001611::IPR003591::IPR013210::IPR032675	Leucine-rich repeat::Leucine-rich repeat, typical subtype::Leucine-rich repeat-containing N-terminal, plant-type::Leucine-rich repeat domain, L domain-like
G6_59587	LOC111392543	Oleur061Scf1032g02004	AT5G01340.1	Mitochondrial substrate carrier family protein	Q9M038	Mitochondrial succinate-fumarate transporter 1	IPR018108::IPR023395	Mitochondrial substrate/solute carrier::Mitochondrial carrier domain
G6_159843	LOC111392555	Oleur061Scf1032g02060	AT1G49000.1			Unknown protein
G6_63498	LOC111380270	Oleur061Scf5453g00005				Unknown protein
G6_40849	LOC111373842	Oleur061Scf5784g01017	AT1G25530.1	Transmembrane amino acid transporter family protein	Q9C6M2	Lysine histidine transporter-like 6	IPR013057	Amino acid transporter, transmembrane domain
G6_50660	LOC111373842	Oleur061Scf5784g01017	AT1G25530.1	Transmembrane amino acid transporter family protein	Q9C6M2	Lysine histidine transporter-like 6	IPR013057	Amino acid transporter, transmembrane domain
G6_31904	LOC111369330
G6_123828	LOC111369330
G6_11922	LOC111369295	Oleur061Scf6020g02052	AT1G67510.1	Leucine-rich repeat protein kinase family protein	Q9ZU46	Receptor protein kinase-like protein ZAR1	IPR011009	Protein kinase-like domain
G6_45808	LOC111376292	Oleur061Scf1311g01030	AT5G50850.1	Transketolase family protein	P52904	Pyruvate dehydrogenase E1 component subunit beta, mitochondrial	IPR005475::IPR009014::IPR027110::IPR029061::IPR033247	Transketolase-like, pyrimidine-binding domain::Transketolase C-terminal/Pyruvate-ferredoxin oxidoreductase domain II::Pyruvate dehydrogenase E1 component subunit beta::Thiamin diphosphate-binding fold::Transketolase family
G6_163926	LOC111369290	Oleur061Scf4396g00002	AT1G67310.1	Calmodulin-binding transcription activator protein with CG-1 and Ankyrin domains	Q9FYG2	Calmodulin-binding transcription activator 4	IPR000048::IPR005559::IPR013783::IPR014756::IPR020683::IPR027417	IQ motif, EF-hand binding site::CG-1 DNA-binding domain::Immunoglobulin-like fold::Immunoglobulin E-set::Ankyrin repeat-containing domain::P-loop containing nucleoside triphosphate hydrolase
G6_173515	LOC111369290	Oleur061Scf4396g00002	AT1G67310.1	Calmodulin-binding transcription activator protein with CG-1 and Ankyrin domains	Q9FYG2	Calmodulin-binding transcription activator 4	IPR000048::IPR005559::IPR013783::IPR014756::IPR020683::IPR027417	IQ motif, EF-hand binding site::CG-1 DNA-binding domain::Immunoglobulin-like fold::Immunoglobulin E-set::Ankyrin repeat-containing domain::P-loop containing nucleoside triphosphate hydrolase
G6_194300	LOC111395836	Oleur061Scf2086g02014	AT1G14180.1	RING/U-box superfamily protein		Unknown protein	IPR013083	Zinc finger, RING/FYVE/PHD-type
G6_9682	LOC111376292	Oleur061Scf1311g01030	AT5G50850.1	Transketolase family protein	P52904	Pyruvate dehydrogenase E1 component subunit beta, mitochondrial	IPR005475::IPR009014::IPR027110::IPR029061::IPR033247	Transketolase-like, pyrimidine-binding domain::Transketolase C-terminal/Pyruvate-ferredoxin oxidoreductase domain II::Pyruvate dehydrogenase E1 component subunit beta::Thiamin diphosphate-binding fold::Transketolase family
G6_50639	LOC111376642	Oleur061Scf2086g01054	AT2G03430.1	Ankyrin repeat family protein	Q54HW1	26S proteasome non-ATPase regulatory subunit 10	IPR005516::IPR020683	Remorin, C-terminal::Ankyrin repeat-containing domain
G6_82	LOC111381364	Oleur061Scf8106g00022	AT1G60070.2	Adaptor protein complex AP-1, gamma subunit	Q84K16	AP-1 complex subunit gamma-1	IPR013041::IPR016024::IPR017107	Coatomer/clathrin adaptor appendage, Ig-like subdomain::Armadillo-type fold::Adaptor protein complex AP-1, gamma subunit
G6_27810	LOC111395836	Oleur061Scf2086g02014	AT1G14180.1	RING/U-box superfamily protein		Unknown protein	IPR013083	Zinc finger, RING/FYVE/PHD-type
G6_57814	LOC111381366	Oleur061Scf8106g00021	AT1G70280.2	NHL domain-containing protein		Unknown protein	IPR011042	Six-bladed beta-propeller, TolB-like
G6_58329	LOC111376292	Oleur061Scf1311g01030	AT5G50850.1	Transketolase family protein	P52904	Pyruvate dehydrogenase E1 component subunit beta, mitochondrial	IPR005475::IPR009014::IPR027110::IPR029061::IPR033247	Transketolase-like, pyrimidine-binding domain::Transketolase C-terminal/Pyruvate-ferredoxin oxidoreductase domain II::Pyruvate dehydrogenase E1 component subunit beta::Thiamin diphosphate-binding fold::Transketolase family
G6_8751	LOC111369268	Oleur061Scf2276g01035				Unknown protein
G6_9732	LOC111381366	Oleur061Scf0155g03012	AT1G70280.2	NHL domain-containing protein		Unknown protein	IPR011042	Six-bladed beta-propeller, TolB-like
G6_10689	LOC111381366	Oleur061Scf8106g00021	AT1G70280.2	NHL domain-containing protein		Unknown protein	IPR011042	Six-bladed beta-propeller, TolB-like
G6_18514	LOC111369268	Oleur061Scf2276g01035				Unknown protein
G6_56334	LOC111381366	Oleur061Scf0155g03012	AT1G70280.2	NHL domain-containing protein		Unknown protein	IPR011042	Six-bladed beta-propeller, TolB-like
G7_28194	LOC111368490	Oleur061Scf2628g00010	AT5G41190.1		Q3T042	RNA-binding protein NOB1	IPR017117::IPR033411	Ribonuclease Nob1, eukaryote::Ribonuclease, PIN domain
G7_45095	LOC111368506	Oleur061Scf2292g00018	AT3G21720.1	isocitrate lyase	P17069	Isocitrate lyase	IPR006254	Isocitrate lyase
G7_63019	LOC111368494	Oleur061Scf0211g04037	AT4G15180.1	SET domain protein 2	O23372	Histone-lysine N-methyltransferase ATXR3	IPR001214::IPR001810::IPR003169::IPR032675	SET domain::F-box domain::GYF domain::Leucine-rich repeat domain, L domain-like
G7_67946	LOC111368381	Oleur061Scf7824g02023				Unknown protein
G7_68760	LOC111368491	Oleur061Scf2983g00018	AT5G23750.1	Remorin family protein	P93788	Remorin	IPR005516	Remorin, C-terminal
G7_114373	LOC111368494	Oleur061Scf0211g04037	AT4G15180.1	SET domain protein 2	O23372	Histone-lysine N-methyltransferase ATXR3	IPR001214::IPR001810::IPR003169::IPR032675	SET domain::F-box domain::GYF domain::Leucine-rich repeat domain, L domain-like
G7_73388	LOC111368478	Oleur061Scf1459g00018				Unknown protein	IPR022212::IPR025486	Domain of unknown function DUF3741::Domain of unknown function DUF4378
G7_28202	LOC111368478	Oleur061Scf2174g00003	AT1G01695.1	Phosphatidylinositol N-acetyglucosaminlytransferase subunit P-related		Unknown protein	IPR022212::IPR025486	Domain of unknown function DUF3741::Domain of unknown function DUF4378
G7_16275	LOC111375468	Oleur061Scf4176g04003	AT5G62050.1	homolog of yeast oxidase assembly 1 (OXA1)	Q42191	Mitochondrial inner membrane protein OXA1	IPR001708::IPR028055	Membrane insertase OXA1/ALB3/YidC::Membrane insertase YidC/Oxa1, C-terminal
G7_33501	LOC111375485	Oleur061Scf4176g01012	AT5G42020.1	Heat shock protein 70 (Hsp 70) family protein	P49118	Luminal-binding protein	IPR013126::IPR029047::IPR029048	Heat shock protein 70 family::Heat shock protein 70kD, peptide-binding domain::Heat shock protein 70kD, C-terminal domain
G7_56649	LOC111375476	Oleur061Scf4176g04008	AT1G64430.1	Pentatricopeptide repeat (PPR) superfamily protein		Unknown protein	IPR002885	Pentatricopeptide repeat
G7_133690	LOC111375485	Oleur061Scf1357g04023	AT5G42020.1	Heat shock protein 70 (Hsp 70) family protein	P49118	Luminal-binding protein	IPR013126::IPR029047::IPR029048	Heat shock protein 70 family::Heat shock protein 70kD, peptide-binding domain::Heat shock protein 70kD, C-terminal domain
G7_137694	LOC111375487	Oleur061Scf4176g01002	AT1G55090.1	carbon-nitrogen hydrolase family protein	Q9C723	Glutamine-dependent NAD(+) synthetase	IPR003694	NAD+ synthetase
G7_5928	LOC111375476	Oleur061Scf4176g04008	AT1G64430.1	Pentatricopeptide repeat (PPR) superfamily protein		Unknown protein	IPR002885	Pentatricopeptide repeat
G7_160921	LOC111375474	Oleur061Scf4176g04009	AT4G23900.1	Nucleoside diphosphate kinase family protein	Q7V425	Nucleoside diphosphate kinase	IPR001564	Nucleoside diphosphate kinase
G7_52436	LOC111373484	Oleur061Scf0221g00025	AT1G16610.3	arginine/serine-rich 45	Q28E41	RNA-binding protein with serine-rich domain 1	IPR000504	RNA recognition motif domain
G7_68152	LOC111368568	Oleur061Scf2304g00013	AT3G12780.1	phosphoglycerate kinase 1	Q42961	Phosphoglycerate kinase, chloroplastic	IPR001576	Phosphoglycerate kinase
G7_40142	LOC111377084	Oleur061Scf1142g05003	AT5G56220.1	P-loop containing nucleoside triphosphate hydrolases superfamily protein		Unknown protein	IPR000157::IPR002182::IPR027417	Toll/interleukin-1 receptor homology TIR domain::NB-ARC::P-loop containing nucleoside triphosphate hydrolase
G7_24496	LOC111368569	Oleur061Scf6224g01039	AT1G56170.1	nuclear factor Y, subunit C2	Q8LCG7	Nuclear transcription factor Y subunit C-2	IPR009072	Histone-fold
G7_31325	LOC111372992	Oleur061Scf0221g01024	AT3G12920.1	SBP (S-ribonuclease binding protein) family protein	Q9FHE4	BOI-related E3 ubiquitin-protein ligase 1	IPR001841	Zinc finger, RING-type
G7_49003	LOC111373484	Oleur061Scf0221g00025	AT1G16610.3	arginine/serine-rich 45	Q28E41	RNA-binding protein with serine-rich domain 1	IPR000504	RNA recognition motif domain
G7_54583	LOC111368534	Oleur061Scf0883g00008	AT3G20640.1	basic helix-loop-helix (bHLH) DNA-binding superfamily protein	Q8GXT3	Transcription factor bHLH123	IPR011598	Myc-type, basic helix-loop-helix bHLH domain
G7_69443	LOC111368564	Oleur061Scf5231g00004				Unknown protein
G7_71014	LOC111368549	Oleur061Scf4821g00018	AT4G04780.1	mediator 21	C0LU16	Mediator of RNA polymerase II transcription subunit 21	IPR021384	Mediator complex, subunit Med21
G7_75153	LOC111368586	Oleur061Scf5158g00039	AT2G18750.1	Calmodulin-binding protein	C0SV51	Calmodulin-binding protein 60 C	IPR012416	CALMODULIN-BINDING PROTEIN60
G7_98902	LOC111373500	Oleur061Scf2414g03031	AT1G79090.1			Unknown protein
G7_103116	LOC111368564	Oleur061Scf5231g00004				Unknown protein
G7_115254	LOC111379229	Oleur061Scf0883g00008	AT3G20640.1	basic helix-loop-helix (bHLH) DNA-binding superfamily protein	Q8GXT3	Transcription factor bHLH123	IPR011598	Myc-type, basic helix-loop-helix bHLH domain
G7_133262	LOC111407132	Oleur061Scf1142g06021	AT5G56290.1	peroxin 5	Q5ZMQ9	Peroxisomal targeting signal 1 receptor	IPR024111	Peroxisomal targeting signal 1 receptor family
G7_153090	LOC111368569	Oleur061Scf6224g01039	AT1G56170.1	nuclear factor Y, subunit C2	Q8LCG7	Nuclear transcription factor Y subunit C-2	IPR009072	Histone-fold
G7_5727	LOC111365993	Oleur061Scf7673g05020				Unknown protein
G7_129730	LOC111384663	Oleur061Scf7673g05044	AT5G25220.1	KNOTTED1-like homeobox gene 3	P48000	Homeobox protein knotted-1-like 3	IPR005539::IPR005540::IPR005541::IPR009057	ELK domain::KNOX1::KNOX2::Homeobox domain-like
G7_44535	LOC111384663	Oleur061Scf7673g05044	AT5G25220.1	KNOTTED1-like homeobox gene 3	P48000	Homeobox protein knotted-1-like 3	IPR005539::IPR005540::IPR005541::IPR009057	ELK domain::KNOX1::KNOX2::Homeobox domain-like
G7_94396	LOC111397670	Oleur061Scf0106g08031	AT5G06080.1	LOB domain-containing protein 33	Q9LHS8	LOB domain-containing protein 33	IPR004883	Lateral organ boundaries, LOB
G7_109869	LOC111384663	Oleur061Scf7673g05044	AT5G25220.1	KNOTTED1-like homeobox gene 3	P48000	Homeobox protein knotted-1-like 3	IPR005539::IPR005540::IPR005541::IPR009057	ELK domain::KNOX1::KNOX2::Homeobox domain-like
G7_157599	LOC111397670	Oleur061Scf0106g08031	AT5G06080.1	LOB domain-containing protein 33	Q9LHS8	LOB domain-containing protein 33	IPR004883	Lateral organ boundaries, LOB
G7_15191	LOC111396867	Oleur061Scf7737g00018	AT2G37730.1	Protein of unknown function (DUF604)		Unknown protein	IPR006740	Protein of unknown function DUF604
G7_53573	LOC111396878	Oleur061Scf8600g00003	AT5G04220.2	Calcium-dependent lipid-binding (CaLB domain) family protein	Q7XA06	Synaptotagmin-3	IPR000008::IPR031468	C2 domain::Synaptotagmin-like mitochondrial-lipid-binding domain
G7_33178	LOC111368428	Oleur061Scf3345g01019	AT3G45980.1	Histone superfamily protein	P93354	Histone H2B	IPR000558::IPR009072	Histone H2B::Histone-fold
G7_81334	LOC111368428	Oleur061Scf3345g01019	AT3G45980.1	Histone superfamily protein	P93354	Histone H2B	IPR000558::IPR009072	Histone H2B::Histone-fold
G7_105482	LOC111368428	Oleur061Scf3345g01019	AT3G45980.1	Histone superfamily protein	P93354	Histone H2B	IPR000558::IPR009072	Histone H2B::Histone-fold
G7_64428	LOC111380985	Oleur061Scf8449g00009	AT2G36380.1	pleiotropic drug resistance 6	Q7PC84	ABC transporter G family member 39	IPR003439::IPR013525::IPR013581::IPR027417::IPR029481	ABC transporter-like::ABC-2 type transporter::Plant PDR ABC transporter associated::P-loop containing nucleoside triphosphate hydrolase::ABC-transporter extracellular N-terminal domain
G7_66967	LOC111380985	Oleur061Scf8449g00009	AT2G36380.1	pleiotropic drug resistance 6	Q7PC84	ABC transporter G family member 39	IPR003439::IPR013525::IPR013581::IPR027417::IPR029481	ABC transporter-like::ABC-2 type transporter::Plant PDR ABC transporter associated::P-loop containing nucleoside triphosphate hydrolase::ABC-transporter extracellular N-terminal domain
G7_24545	LOC111383908	Oleur061Scf1368g01045	AT3G11760.1			Unknown protein
G7_3486	LOC111382014	Oleur061Scf7307g00007	AT3G04550.1		Q9LKR8	Rubisco accumulation factor 1, chloroplastic
G7_100623	LOC111383908	Oleur061Scf1368g01045	AT3G11760.1			Unknown protein
G7_102665	LOC111383905	Oleur061Scf1368g01041	AT5G22040.1			Unknown protein
G7_87110	LOC111383905	Oleur061Scf7368g00004	AT5G22040.1			Unknown protein
G7_70405	LOC111381006	Oleur061Scf8342g00003	AT3G52220.1		Q99LX5	Multiple myeloma tumor-associated protein 2 homolog	IPR019315	Kinase phosphorylation domain
G7_11146	LOC111407852	Oleur061Scf1385g00010	AT1G54560.1	Myosin family protein with Dil domain	F4HWY6	Myosin-11	IPR000048::IPR027417	IQ motif, EF-hand binding site::P-loop containing nucleoside triphosphate hydrolase
G7_26935	LOC111383931	Oleur061Scf1012g00009	AT3G04590.2	AT hook motif DNA-binding family protein	A1L4X7	AT-hook motif nuclear-localized protein 14	IPR005175	PPC domain
G7_185507	LOC111383931	Oleur061Scf1385g01006	AT3G04590.2	AT hook motif DNA-binding family protein	A1L4X7	AT-hook motif nuclear-localized protein 14	IPR005175	PPC domain
G7_27957	LOC111368646	Oleur061Scf8916g00005	AT4G32810.1	carotenoid cleavage dioxygenase 8	Q8VY26	Carotenoid cleavage dioxygenase 8, chloroplastic	IPR004294	Carotenoid oxygenase
G7_49721	LOC111368646	Oleur061Scf8916g00005	AT4G32810.1	carotenoid cleavage dioxygenase 8	Q8VY26	Carotenoid cleavage dioxygenase 8, chloroplastic	IPR004294	Carotenoid oxygenase
G7_77053	LOC111389218	Oleur061Scf3080g01013	AT3G12360.1	Ankyrin repeat family protein	Q9C7A2	Ankyrin repeat-containing protein At3g12360	IPR020683::IPR026961	Ankyrin repeat-containing domain::PGG domain
G7_120924	LOC111389218	Oleur061Scf3080g01013	AT3G12360.1	Ankyrin repeat family protein	Q9C7A2	Ankyrin repeat-containing protein At3g12360	IPR020683::IPR026961	Ankyrin repeat-containing domain::PGG domain
G7_138988	LOC111386900	Oleur061Scf3080g03008	AT2G39580.1			Unknown protein	IPR011990::IPR019607	Tetratricopeptide-like helical domain::Putative zinc-finger domain
G7_157801	LOC111386900	Oleur061Scf3080g03008	AT2G39580.1			Unknown protein	IPR011990::IPR019607	Tetratricopeptide-like helical domain::Putative zinc-finger domain
G7_141971	LOC111368409	Oleur061Scf0465g01012	AT2G25770.1	Polyketide cyclase/dehydrase and lipid transport superfamily protein	P59082	Lachrymatory-factor synthase	IPR019587::IPR023393	Polyketide cyclase/dehydrase::START-like domain
G7_38825	LOC111397753	Oleur061Scf6410g01028	AT2G26040.1	PYR1-like 2	O80992	Abscisic acid receptor PYL2	IPR019587::IPR023393	Polyketide cyclase/dehydrase::START-like domain
G7_56248	LOC111397753	Oleur061Scf6410g01028	AT2G26040.1	PYR1-like 2	O80992	Abscisic acid receptor PYL2	IPR019587::IPR023393	Polyketide cyclase/dehydrase::START-like domain
G7_31853	LOC111368653	Oleur061Scf7470g00003	AT4G26270.1	phosphofructokinase 3	Q9M076	ATP-dependent 6-phosphofructokinase 6	IPR000023::IPR022953	Phosphofructokinase domain::ATP-dependent 6-phosphofructokinase
G7_8048	LOC111368716	Oleur061Scf1109g01029	AT2G35130.2	Tetratricopeptide repeat (TPR)-like superfamily protein	A3C6G9	Glycine cleavage system H protein, mitochondrial	IPR000089::IPR002885::IPR002930::IPR011990	Biotin/lipoyl attachment::Pentatricopeptide repeat::Glycine cleavage system H-protein::Tetratricopeptide-like helical domain
G7_48501	LOC111368699	Oleur061Scf0541g04002	AT4G20430.1	Subtilase family protein	Q9SUN6	Subtilisin-like protease SBT2.2	IPR005735::IPR015500::IPR023827::IPR023828	Zinc finger, LSD1-type::Peptidase S8, subtilisin-related::Peptidase S8, subtilisin, Asp-active site::Peptidase S8, subtilisin, Ser-active site
G7_14029	LOC111397317	Oleur061Scf4883g01054	AT5G54650.1	formin homology5	Q94B77	Formin-like protein 5	IPR015425	Formin, FH2 domain
G7_14752	LOC111368885	Oleur061Scf6575g01035	AT5G20040.3	isopentenyltransferase 9	Q9C5J6	tRNA dimethylallyltransferase 9	IPR011009::IPR013320::IPR018022::IPR027417	Protein kinase-like domain::Concanavalin A-like lectin/glucanase domain::tRNA dimethylallyltransferase::P-loop containing nucleoside triphosphate hydrolase
G7_13835	LOC111368877	Oleur061Scf1174g02010	AT1G78600.2	light-regulated zinc finger protein 1	Q9SYM2	B-box zinc finger protein 22	IPR000315	B-box-type zinc finger
G7_15264	LOC111368877	Oleur061Scf1174g02010	AT1G78600.2	light-regulated zinc finger protein 1	Q9SYM2	B-box zinc finger protein 22	IPR000315	B-box-type zinc finger
G8_58335	LOC111411312	Oleur061Scf5172g04030	AT2G45540.2	WD-40 repeat family protein / beige-related	F4IG73	BEACH domain-containing protein C2	IPR000409::IPR011993::IPR013320::IPR015943::IPR031570	BEACH domain::PH domain-like::Concanavalin A-like lectin/glucanase domain::WD40/YVTN repeat-like-containing domain::Domain of unknown function DUF4704
G8_118775	LOC111411312	Oleur061Scf5172g04030	AT2G45540.2	WD-40 repeat family protein / beige-related	F4IG73	BEACH domain-containing protein C2	IPR000409::IPR011993::IPR013320::IPR015943::IPR031570	BEACH domain::PH domain-like::Concanavalin A-like lectin/glucanase domain::WD40/YVTN repeat-like-containing domain::Domain of unknown function DUF4704
G8_74268	LOC111379783	Oleur061Scf7007g05021	AT3G61890.1	homeobox 12	P46897	Homeobox-leucine zipper protein ATHB-7	IPR003106::IPR009057	Leucine zipper, homeobox-associated::Homeobox domain-like
G8_31354	LOC111411030
G8_53476	LOC111390982	Oleur061Scf1486g02026	AT2G46830.1	circadian clock associated 1	P92973	Protein CCA1	IPR009057	Homeobox domain-like
G8_84189	LOC111397538	Oleur061Scf0250g03022	AT3G05040.1	ARM repeat superfamily protein	Q0WP44	Protein HASTY 1	IPR016024	Armadillo-type fold
G8_2250	LOC111410462
G8_62146	LOC111410427	Oleur061Scf0081g06028	AT2G44280.1	Major facilitator superfamily protein	Q6NUT3	Major facilitator superfamily domain-containing protein 12	IPR020846	Major facilitator superfamily domain
G8_19429	LOC111410484	Oleur061Scf0651g03014	AT3G08030.1	Protein of unknown function, DUF642		Unknown protein	IPR006946::IPR008979	Domain of unknown function DUF642::Galactose-binding domain-like
G8_110527	LOC111410465	Oleur061Scf6844g00021	AT1G51200.1	A20/AN1-like zinc finger family protein	A3BDI8	Zinc finger A20 and AN1 domain-containing stress-associated protein 8	IPR000058::IPR002653	Zinc finger, AN1-type::Zinc finger, A20-type
G8_22297	LOC111410465	Oleur061Scf6844g00021	AT1G51200.1	A20/AN1-like zinc finger family protein	A3BDI8	Zinc finger A20 and AN1 domain-containing stress-associated protein 8	IPR000058::IPR002653	Zinc finger, AN1-type::Zinc finger, A20-type
G8_32643	LOC111410431	Oleur061Scf2478g01010	AT5G17310.2	UDP-glucose pyrophosphorylase 2	Q9SDX3	UTP--glucose-1-phosphate uridylyltransferase	IPR001865::IPR002618::IPR023591::IPR029044	Ribosomal protein S2::UDPGP family::Ribosomal protein S2, flavodoxin-like domain::Nucleotide-diphospho-sugar transferases
G8_34310	LOC111410431	Oleur061Scf2478g01010	AT5G17310.2	UDP-glucose pyrophosphorylase 2	Q9SDX3	UTP--glucose-1-phosphate uridylyltransferase	IPR001865::IPR002618::IPR023591::IPR029044	Ribosomal protein S2::UDPGP family::Ribosomal protein S2, flavodoxin-like domain::Nucleotide-diphospho-sugar transferases
G8_90509	LOC111410451	Oleur061Scf2944g04039	AT3G52130.1	Bifunctional inhibitor/lipid-transfer protein/seed storage 2S albumin superfamily protein		Unknown protein	IPR016140	Bifunctional inhibitor/plant lipid transfer protein/seed storage helical domain
G8_151050	LOC111374918	Oleur061Scf5087g00010	AT2G21350.1	RNA-binding CRS1 / YhbY (CRM) domain protein		Unknown protein	IPR001890	RNA-binding, CRM domain
G8_32254	LOC111388470	Oleur061Scf3888g00004	AT4G39090.1	Papain family cysteine protease	P25804	Cysteine proteinase 15A	IPR013128::IPR025660::IPR025661	Peptidase C1A::Cysteine peptidase, histidine active site::Cysteine peptidase, asparagine active site
G8_32889	LOC111410591	Oleur061Scf8146g01022	AT4G37180.2	Homeodomain-like superfamily protein	Q9ZQ85	Myb family transcription factor EFM	IPR009057	Homeobox domain-like
G8_126600	LOC111410624	Oleur061Scf7467g00005			Q9SLN1	Filament-like plant protein 7	IPR008587	Filament-like plant protein
G8_72967	LOC111365464	Oleur061Scf1997g01007			Q93YR9	Auxin response factor 16
G8_78361	LOC111410843	Oleur061Scf6402g04020	AT2G45130.1	SPX domain gene 3	Q5PP62	SPX domain-containing protein 3	IPR004331::IPR031142	SPX domain::SPX domain-containing protein
G8_106943	LOC111410816	Oleur061Scf8652g04018	AT2G45460.3	SMAD/FHA domain-containing protein		Unknown protein	IPR000580::IPR008984	TSC-22 / Dip / Bun::SMAD/FHA domain
G8_149957	LOC111410780	Oleur061Scf0903g02012	AT3G61050.1	Calcium-dependent lipid-binding (CaLB domain) family protein	A0JJX5	Synaptotagmin-4	IPR000008::IPR031069::IPR031468	C2 domain::Calcium-dependent lipid-binding transcriptional regulator, plant::Synaptotagmin-like mitochondrial-lipid-binding domain
G8_154006	LOC111390465	Oleur061Scf3114g02031	AT2G45880.1	beta-amylase 7	O80831	Beta-amylase 7	IPR001554::IPR008540::IPR017853	Glycoside hydrolase, family 14::BES1/BZR1 plant transcription factor, N-terminal::Glycoside hydrolase superfamily
G8_161427	LOC111410861	Oleur061Scf6402g05035	AT3G15351.1			Unknown protein	IPR030482	p53 and DNA damage-regulated protein 1
G8_9071	LOC111380057	Oleur061Scf0193g10016				Unknown protein
G8_53212	LOC111380052	Oleur061Scf2336g03010	AT2G44900.1	ARABIDILLO-1	O22161	Protein ARABIDILLO 1	IPR001810::IPR016024::IPR032675	F-box domain::Armadillo-type fold::Leucine-rich repeat domain, L domain-like
G8_108830	LOC111380057	Oleur061Scf0193g10016				Unknown protein
G8_33194	LOC111373255	Oleur061Scf8486g00019	AT2G44600.1			Unknown protein
G8_50116	LOC111373255	Oleur061Scf8486g00019	AT2G44600.1			Unknown protein
G8_10645	LOC111377492	Oleur061Scf1459g11027	AT1G08800.1	Protein of unknown function, DUF593	F4HXQ7	Myosin-binding protein 1	IPR007656	GTD-binding domain
G8_70056	LOC111401529	Oleur061Scf2894g00025	AT5G04920.1	EAP30/Vps36 family protein	Q9FF81	Vacuolar protein sorting-associated protein 36	IPR007286::IPR011991::IPR011993::IPR021648	EAP30::Winged helix-turn-helix DNA-binding domain::PH domain-like::Vacuolar protein sorting protein 36, GLUE domain
G8_175479	LOC111377492	Oleur061Scf1459g11027	AT1G08800.1	Protein of unknown function, DUF593	F4HXQ7	Myosin-binding protein 1	IPR007656	GTD-binding domain
G8_127512	LOC111401518
G8_143199	LOC111401518
G8_34170	LOC111410302	Oleur061Scf2940g00001	AT2G38730.1	Cyclophilin-like peptidyl-prolyl cis-trans isomerase family protein	Q0P5D0	Peptidyl-prolyl cis-trans isomerase H	IPR002130::IPR024936::IPR029000	Cyclophilin-type peptidyl-prolyl cis-trans isomerase domain::Cyclophilin-type peptidyl-prolyl cis-trans isomerase::Cyclophilin-like domain
G8_139212	LOC111409238	Oleur061Scf1459g04022	AT5G13500.1			Unknown protein
G9_5801	LOC111370352	Oleur061Scf0107g01016	AT2G41450.1	N-acetyltransferases;N-acetyltransferases	Q7YR40	Mediator of DNA damage checkpoint protein 1	IPR001357::IPR016181	BRCT domain::Acyl-CoA N-acyltransferase
G9_34720	LOC111370516	Oleur061Scf0745g01015	AT2G04865.1	Aminotransferase-like, plant mobile domain family protein	Q9LNG5	Serine/threonine-protein phosphatase 7 long form homolog	IPR019557	Aminotransferase-like, plant mobile domain
G9_28475	LOC111370236	Oleur061Scf6126g01047	AT2G41680.1	NADPH-dependent thioredoxin reductase C	Q70G58	Thioredoxin reductase NTRC	IPR000103::IPR012336::IPR023753	Pyridine nucleotide-disulphide oxidoreductase, class-II::Thioredoxin-like fold::FAD/NADP-binding domain
G9_4313	LOC111369451	Oleur061Scf4613g00034	AT5G06710.1	homeobox from Arabidopsis thaliana	P46665	Homeobox-leucine zipper protein HAT14	IPR003106::IPR009057	Leucine zipper, homeobox-associated::Homeobox domain-like
G9_4558	LOC111370079	Oleur061Scf7298g00006	AT3G57650.1	lysophosphatidyl acyltransferase 2	Q9SYC8	1-acyl-sn-glycerol-3-phosphate acyltransferase 3	IPR002123::IPR032098	Phospholipid/glycerol acyltransferase::Acyltransferase, C-terminal domain
G9_21178	LOC111369487	Oleur061Scf2647g00001	AT1G57860.1	Translation protein SH3-like family protein	Q9FDZ9	60S ribosomal protein L21-2	IPR001147	Ribosomal protein L21e
G9_22073	LOC111370236	Oleur061Scf6126g01047	AT2G41680.1	NADPH-dependent thioredoxin reductase C	Q70G58	Thioredoxin reductase NTRC	IPR000103::IPR012336::IPR023753	Pyridine nucleotide-disulphide oxidoreductase, class-II::Thioredoxin-like fold::FAD/NADP-binding domain
G9_41024	LOC111370062	Oleur061Scf7298g00004	AT3G04810.1	NIMA-related kinase 2	Q9CAU7	Serine/threonine-protein kinase Nek2	IPR011009	Protein kinase-like domain
G9_52738	LOC111369451	Oleur061Scf4613g00034	AT5G06710.1	homeobox from Arabidopsis thaliana	P46665	Homeobox-leucine zipper protein HAT14	IPR003106::IPR009057	Leucine zipper, homeobox-associated::Homeobox domain-like
G9_66211	LOC111374879	Oleur061Scf7298g01022	AT3G12810.1	SNF2 domain-containing protein / helicase domain-containing protein	Q6CJ38	Helicase SWR1	IPR001650::IPR027417	Helicase, C-terminal::P-loop containing nucleoside triphosphate hydrolase
G9_68348	LOC111365756	Oleur061Scf4613g00008	AT3G58000.1	VQ motif-containing protein	Q9M2P8	VQ motif-containing protein 25	IPR008889	VQ
G9_88092	LOC111365756	Oleur061Scf4613g00008	AT3G58000.1	VQ motif-containing protein	Q9M2P8	VQ motif-containing protein 25	IPR008889	VQ
G9_90051	LOC111374688	Oleur061Scf0553g03019	AT1G58030.1	cationic amino acid transporter 2	Q9ASS7	Cationic amino acid transporter 2, vacuolar	IPR002293::IPR029485	Amino acid/polyamine transporter I::Cationic amino acid transporter, C-terminal
G9_95877	LOC111369178	Oleur061Scf2716g01013	AT1G65440.1	global transcription factor group B1	Q7KZ85	Transcription elongation factor SPT6	IPR000980::IPR010994::IPR012337::IPR012340::IPR023323::IPR027999::IPR028088::IPR032706	SH2 domain::RuvA domain 2-like::Ribonuclease H-like domain::Nucleic acid-binding, OB-fold::Tex-like domain::Death-like domain of Spt6::Helix-turn-helix DNA-binding domain of Spt6::Transcription elongation factor Spt6, helix-hairpin-helix motif
G9_100519	LOC111370042	Oleur061Scf7298g01020	AT3G57890.2	Tubulin binding cofactor C domain-containing protein	Q5ZKT1	TBCC domain-containing protein 1	IPR017901	C-CAP/cofactor C-like domain
G9_138788	LOC111369487	Oleur061Scf2647g00001	AT1G57860.1	Translation protein SH3-like family protein	Q9FDZ9	60S ribosomal protein L21-2	IPR001147	Ribosomal protein L21e
G9_141088	LOC111374879	Oleur061Scf7298g01022	AT3G12810.1	SNF2 domain-containing protein / helicase domain-containing protein	Q6CJ38	Helicase SWR1	IPR001650::IPR027417	Helicase, C-terminal::P-loop containing nucleoside triphosphate hydrolase
G9_160474	LOC111370062	Oleur061Scf7298g00004	AT3G04810.1	NIMA-related kinase 2	Q9CAU7	Serine/threonine-protein kinase Nek2	IPR011009	Protein kinase-like domain
G9_11482	LOC111370591	Oleur061Scf0706g02035	AT5G18170.1	glutamate dehydrogenase 1	P93541	Glutamate dehydrogenase	IPR006095::IPR016040::IPR033524	Glutamate/phenylalanine/leucine/valine dehydrogenase::NADP-binding domain::Leu/Phe/Val dehydrogenases active site
G9_117068	LOC111370079	Oleur061Scf7298g00006	AT3G57650.1	lysophosphatidyl acyltransferase 2	Q9SYC8	1-acyl-sn-glycerol-3-phosphate acyltransferase 3	IPR002123::IPR032098	Phospholipid/glycerol acyltransferase::Acyltransferase, C-terminal domain
G9_126935	LOC111370322	Oleur061Scf6126g02006	AT3G57280.1	Transmembrane proteins 14C	Q93V66	Protein FATTY ACID EXPORT 1, chloroplastic	IPR005349	TMEM14 family
G9_53030	LOC111370516	Oleur061Scf0745g01015	AT2G04865.1	Aminotransferase-like, plant mobile domain family protein	Q9LNG5	Serine/threonine-protein phosphatase 7 long form homolog	IPR019557	Aminotransferase-like, plant mobile domain
G9_9246	LOC111370352	Oleur061Scf0107g01016	AT2G41450.1	N-acetyltransferases;N-acetyltransferases	Q7YR40	Mediator of DNA damage checkpoint protein 1	IPR001357::IPR016181	BRCT domain::Acyl-CoA N-acyltransferase
G9_40258	LOC111368942	Oleur061Scf0553g03027	AT3G03680.1	C2 calcium/lipid-binding plant phosphoribosyltransferase family protein	Q9FL59	FT-interacting protein 1	IPR000008::IPR013583	C2 domain::Phosphoribosyltransferase C-terminal
G9_56798	LOC111368942	Oleur061Scf0553g03027	AT3G03680.1	C2 calcium/lipid-binding plant phosphoribosyltransferase family protein	Q9FL59	FT-interacting protein 1	IPR000008::IPR013583	C2 domain::Phosphoribosyltransferase C-terminal
G9_70025	LOC111368942	Oleur061Scf0553g03027	AT3G03680.1	C2 calcium/lipid-binding plant phosphoribosyltransferase family protein	Q9FL59	FT-interacting protein 1	IPR000008::IPR013583	C2 domain::Phosphoribosyltransferase C-terminal
G9_83496	LOC111369178	Oleur061Scf2716g01013	AT1G65440.1	global transcription factor group B1	Q7KZ85	Transcription elongation factor SPT6	IPR000980::IPR010994::IPR012337::IPR012340::IPR023323::IPR027999::IPR028088::IPR032706	SH2 domain::RuvA domain 2-like::Ribonuclease H-like domain::Nucleic acid-binding, OB-fold::Tex-like domain::Death-like domain of Spt6::Helix-turn-helix DNA-binding domain of Spt6::Transcription elongation factor Spt6, helix-hairpin-helix motif
G9_142981	LOC111368942	Oleur061Scf0553g03027	AT3G03680.1	C2 calcium/lipid-binding plant phosphoribosyltransferase family protein	Q9FL59	FT-interacting protein 1	IPR000008::IPR013583	C2 domain::Phosphoribosyltransferase C-terminal
G9_28651	LOC111368032	Oleur061Scf5106g01013	AT2G18710.1	SECY homolog 1	P93690	Preprotein translocase subunit SECY, chloroplastic	IPR002208::IPR023201	SecY/SEC61-alpha family::SecY subunit domain
G9_35488	LOC111368043	Oleur061Scf6035g00050	AT4G30420.1	nodulin MtN21 /EamA-like transporter family protein	Q9M0B8	WAT1-related protein At4g30420	IPR000620::IPR030184	EamA domain::WAT1-related protein
G9_67888	LOC111368182	Oleur061Scf7178g02006	AT5G57940.1	cyclic nucleotide gated channel 5	O65717	Cyclic nucleotide-gated ion channel 1	IPR000048::IPR003938	IQ motif, EF-hand binding site::Potassium channel, voltage-dependent, EAG/ELK/ERG
G9_77441	LOC111368182	Oleur061Scf7178g02006	AT5G57940.1	cyclic nucleotide gated channel 5	O65717	Cyclic nucleotide-gated ion channel 1	IPR000048::IPR003938	IQ motif, EF-hand binding site::Potassium channel, voltage-dependent, EAG/ELK/ERG
G9_95054	LOC111368043	Oleur061Scf6035g00050	AT4G30420.1	nodulin MtN21 /EamA-like transporter family protein	Q9M0B8	WAT1-related protein At4g30420	IPR000620::IPR030184	EamA domain::WAT1-related protein
G9_142808	LOC111368075	Oleur061Scf6035g00020	AT4G30720.1	FAD/NAD(P)-binding oxidoreductase family protein		Unknown protein	IPR023753	FAD/NADP-binding domain
G9_98743	LOC111374260	Oleur061Scf1177g01037	AT3G06480.1	DEAD box RNA helicase family protein	Q9SQV1	DEAD-box ATP-dependent RNA helicase 40	IPR001202::IPR001650::IPR014001::IPR014014::IPR027417	WW domain::Helicase, C-terminal::Helicase superfamily 1/2, ATP-binding domain::RNA helicase, DEAD-box type, Q motif::P-loop containing nucleoside triphosphate hydrolase
G9_112383	LOC111374260	Oleur061Scf1177g01037	AT3G06480.1	DEAD box RNA helicase family protein	Q9SQV1	DEAD-box ATP-dependent RNA helicase 40	IPR001202::IPR001650::IPR014001::IPR014014::IPR027417	WW domain::Helicase, C-terminal::Helicase superfamily 1/2, ATP-binding domain::RNA helicase, DEAD-box type, Q motif::P-loop containing nucleoside triphosphate hydrolase
G9_195327	LOC111368232	Oleur061Scf1390g01024	AT5G57950.1	26S proteasome regulatory subunit, putative		Unknown protein
G9_30531	LOC111367917	Oleur061Scf5473g02018	AT3G16730.1		Q9LUR0	Condensin-2 complex subunit H2	IPR031737::IPR031739	Condensin-2 complex subunit H2, C-terminal::Condensin-2 complex subunit H2
G9_89490	LOC111367917	Oleur061Scf5473g02018	AT3G16730.1		Q9LUR0	Condensin-2 complex subunit H2	IPR031737::IPR031739	Condensin-2 complex subunit H2, C-terminal::Condensin-2 complex subunit H2
G9_118258	LOC111367935	Oleur061Scf5473g02003	AT3G16785.1	phospholipase D P1	Q9LRZ5	Phospholipase D zeta 1	IPR011993::IPR015679::IPR025202	PH domain-like::Phospholipase D family::Phospholipase D-like domain
G9_202222	LOC111368232	Oleur061Scf1390g01024	AT5G57950.1	26S proteasome regulatory subunit, putative		Unknown protein
G9_23285	LOC111385078	Oleur061Scf2545g01020	AT3G05680.2	embryo defective 2016		Unknown protein	IPR026736::IPR031801	Protein virilizer::Virilizer, N-terminal
G9_24746	LOC111376146	Oleur061Scf2545g03015	AT2G35910.1	RING/U-box superfamily protein	Q8RX29	RING-H2 finger protein ATL70	IPR013083	Zinc finger, RING/FYVE/PHD-type
G9_39363	LOC111385076	Oleur061Scf2545g02020	AT2G35940.1	BEL1-like homeodomain 1	Q9SJ56	BEL1-like homeodomain protein 1	IPR006563::IPR009057	POX domain::Homeobox domain-like
G9_82081	LOC111387875	Oleur061Scf2545g02005	AT5G06370.1	NC domain-containing protein-related		Unknown protein	IPR000064::IPR007053	Endopeptidase, NLPC/P60 domain::LRAT-like domain
G9_5620	LOC111367224	Oleur061Scf2545g04006	AT3G54720.1	Peptidase M28 family protein	Q9CZR2	N-acetylated-alpha-linked acidic dipeptidase 2	IPR007365::IPR007484	Transferrin receptor-like, dimerisation domain::Peptidase M28
G9_41157	LOC111367263	Oleur061Scf4917g00008				Unknown protein	IPR014729	Rossmann-like alpha/beta/alpha sandwich fold
G9_84939	LOC111367224	Oleur061Scf2545g04006	AT3G54720.1	Peptidase M28 family protein	Q9CZR2	N-acetylated-alpha-linked acidic dipeptidase 2	IPR007365::IPR007484	Transferrin receptor-like, dimerisation domain::Peptidase M28
G9_116283	LOC111367263	Oleur061Scf4917g00008				Unknown protein	IPR014729	Rossmann-like alpha/beta/alpha sandwich fold
G9_47415	LOC111367740	Oleur061Scf5471g00012	AT5G35460.1			Unknown protein	IPR021261	Protein of unknown function DUF2838
G9_48767	LOC111403540	Oleur061Scf5471g01004	AT2G06520.1	photosystem II subunit X		Unknown protein	IPR009518	Photosystem II PsbX
G9_59584	LOC111403540	Oleur061Scf5471g01004	AT2G06520.1	photosystem II subunit X		Unknown protein	IPR009518	Photosystem II PsbX
G9_89656	LOC111403540	Oleur061Scf5471g01004	AT2G06520.1	photosystem II subunit X		Unknown protein	IPR009518	Photosystem II PsbX
G9_47753	LOC111366891	Oleur061Scf6960g00002	AT1G19220.1	auxin response factor 19	Q8RYC8	Auxin response factor 19	IPR010525::IPR015300	Auxin response factor::DNA-binding pseudobarrel domain
G9_48978	LOC111373907	Oleur061Scf8749g00004				Unknown protein	IPR020683::IPR026961	Ankyrin repeat-containing domain::PGG domain
G9_49796	LOC111373868	Oleur061Scf0720g01021	AT5G20720.1	chaperonin 20	O65282	20 kDa chaperonin, chloroplastic	IPR020818	GroES chaperonin family
G9_152212	LOC111366891	Oleur061Scf0720g01028	AT1G19220.1	auxin response factor 19	Q8RYC8	Auxin response factor 19	IPR000270::IPR010525::IPR015300::IPR033389	PB1 domain::Auxin response factor::DNA-binding pseudobarrel domain::AUX/IAA domain
G9_168225	LOC111373907	Oleur061Scf8749g00004				Unknown protein	IPR020683::IPR026961	Ankyrin repeat-containing domain::PGG domain
G9_56674	LOC111372683	Oleur061Scf3940g00019	AT2G07050.1	cycloartenol synthase 1	O82139	Cycloartenol Synthase	IPR008930	Terpenoid cyclases/protein prenyltransferase alpha-alpha toroid
G9_140641	LOC111372662	Oleur061Scf1745g01033				Unknown protein
G9_152838	LOC111372662	Oleur061Scf1745g01033				Unknown protein
G9_197101	LOC111372683	Oleur061Scf3940g00019	AT2G07050.1	cycloartenol synthase 1	O82139	Cycloartenol Synthase	IPR008930	Terpenoid cyclases/protein prenyltransferase alpha-alpha toroid
G9_9714	LOC111387230	Oleur061Scf9085g05044	AT1G53830.1	pectin methylesterase 2	P83948	Pectinesterase 3	IPR006501::IPR011050::IPR033131	Pectinesterase inhibitor domain::Pectin lyase fold/virulence factor::Pectinesterase, Asp active site
G9_92332	LOC111387230	Oleur061Scf9085g05044	AT1G53830.1	pectin methylesterase 2	P83948	Pectinesterase 3	IPR006501::IPR011050::IPR033131	Pectinesterase inhibitor domain::Pectin lyase fold/virulence factor::Pectinesterase, Asp active site
G9_8170	LOC111367642	Oleur061Scf8664g00017	AT1G72880.2	Survival protein SurE-like phosphatase/nucleotidase	Q30QB8	5'-nucleotidase SurE	IPR002828	Survival protein SurE-like phosphatase/nucleotidase
G9_129012	LOC111382435	Oleur061Scf5087g02028	AT1G15800.1			Unknown protein
G9_136253	LOC111367652	Oleur061Scf0937g02013	AT3G13890.1	myb domain protein 26	Q9SPG3	Transcription factor MYB26	IPR009057	Homeobox domain-like
G9_171847	LOC111377848	Oleur061Scf0427g01002	AT3G02760.1	Class II aaRS and biotin synthetases superfamily protein	F4IYF8	Histidine--tRNA ligase, cytoplasmic	IPR004516::IPR008948	Histidine-tRNA ligase/ATP phosphoribosyltransferase regulatory subunit::L-Aspartase-like
G9_5597	LOC111369964	Oleur061Scf0890g06020				Unknown protein
G9_6959	LOC111366643	Oleur061Scf1361g02006	AT1G80000.1	CASC3/Barentsz eIF4AIII binding		Unknown protein	IPR018545	Btz domain
G9_9753	LOC111369964	Oleur061Scf0890g06020				Unknown protein
G9_13110	LOC111366643	Oleur061Scf1395g08036	AT1G80000.1	CASC3/Barentsz eIF4AIII binding		Unknown protein	IPR018545	Btz domain
G9_18009	LOC111366624	Oleur061Scf1395g08008	AT1G79920.1	Heat shock protein 70 (Hsp 70) family protein	F4HQD4	Heat shock 70 kDa protein 15	IPR013126::IPR029047::IPR029048	Heat shock protein 70 family::Heat shock protein 70kD, peptide-binding domain::Heat shock protein 70kD, C-terminal domain
G9_67374	LOC111366643	Oleur061Scf1395g08036	AT1G80000.1	CASC3/Barentsz eIF4AIII binding		Unknown protein	IPR018545	Btz domain
G9_82997	LOC111366643	Oleur061Scf1395g08036	AT1G80000.1	CASC3/Barentsz eIF4AIII binding		Unknown protein	IPR018545	Btz domain
G9_103396	LOC111374235	Oleur061Scf8664g00014	AT2G19480.1	nucleosome assembly protein 1;2	Q5VND6	Nucleosome assembly protein 1;1	IPR002164	Nucleosome assembly protein NAP
G9_48514	LOC111383989	Oleur061Scf1395g09050	AT1G55490.1	chaperonin 60 beta	Q9LJE4	Chaperonin 60 subunit beta 2, chloroplastic	IPR002423::IPR011685::IPR027409::IPR027413	Chaperonin Cpn60/TCP-1 family::LETM1-like::GroEL-like apical domain::GroEL-like equatorial domain
G9_13227	LOC111375376	Oleur061Scf1353g01007	AT2G07680.1	multidrug resistance-associated protein 11	Q9SKX0	ABC transporter C family member 13	IPR011527	ABC transporter type 1, transmembrane domain
G9_34457	LOC111365931	Oleur061Scf7681g01003	AT5G51070.1	Clp ATPase	P42762	Chaperone protein ClpD, chloroplastic	IPR001270::IPR004176::IPR019489::IPR027417::IPR028299	ClpA/B family::Clp, N-terminal::Clp ATPase, C-terminal::P-loop containing nucleoside triphosphate hydrolase::ClpA/B, conserved site 2
G9_37891	LOC111375376	Oleur061Scf1353g01007	AT2G07680.1	multidrug resistance-associated protein 11	Q9SKX0	ABC transporter C family member 13	IPR011527	ABC transporter type 1, transmembrane domain
G9_47708	LOC111365931	Oleur061Scf7681g01003	AT5G51070.1	Clp ATPase	P42762	Chaperone protein ClpD, chloroplastic	IPR001270::IPR004176::IPR019489::IPR027417::IPR028299	ClpA/B family::Clp, N-terminal::Clp ATPase, C-terminal::P-loop containing nucleoside triphosphate hydrolase::ClpA/B, conserved site 2
G9_58621	LOC111365931	Oleur061Scf7681g01003	AT5G51070.1	Clp ATPase	P42762	Chaperone protein ClpD, chloroplastic	IPR001270::IPR004176::IPR019489::IPR027417::IPR028299	ClpA/B family::Clp, N-terminal::Clp ATPase, C-terminal::P-loop containing nucleoside triphosphate hydrolase::ClpA/B, conserved site 2
G9_64148	LOC111374814	Oleur061Scf9165g03004	AT1G80980.1			Unknown protein
G9_89784	LOC111375376	Oleur061Scf1353g01007	AT2G07680.1	multidrug resistance-associated protein 11	Q9SKX0	ABC transporter C family member 13	IPR011527	ABC transporter type 1, transmembrane domain
G9_88186	LOC111366451	Oleur061Scf7681g00024				Unknown protein
G9_19567	LOC111388467	Oleur061Scf0023g03015	AT5G04500.1	glycosyltransferase family protein 47	Q84WB7	Glycosyltransferase family protein 64 protein C5	IPR023296::IPR029044	Glycosyl hydrolase, five-bladed beta-propellor domain::Nucleotide-diphospho-sugar transferases
G9_49383	LOC111373588	Oleur061Scf4206g00001	AT5G04440.1	Protein of unknown function (DUF1997)		Unknown protein	IPR018971	Protein of unknown function DUF1997
G9_132551	LOC111373588	Oleur061Scf4206g00001	AT5G04440.1	Protein of unknown function (DUF1997)		Unknown protein	IPR018971	Protein of unknown function DUF1997
G9_193511	LOC111388467	Oleur061Scf0023g03015	AT5G04500.1	glycosyltransferase family protein 47	Q84WB7	Glycosyltransferase family protein 64 protein C5	IPR023296::IPR029044	Glycosyl hydrolase, five-bladed beta-propellor domain::Nucleotide-diphospho-sugar transferases
G9_471	LOC111366234	Oleur061Scf1686g05014	AT2G37840.1	Protein kinase superfamily protein	F4IRW0	Serine/threonine-protein kinase ATG1c	IPR011009	Protein kinase-like domain
G9_102250	LOC111365613	Oleur061Scf0801g00012	AT3G09030.1	BTB/POZ domain-containing protein	Q9S7R7	BTB/POZ domain-containing protein At3g09030	IPR011044::IPR011333	Quinoprotein amine dehydrogenase, beta chain-like::SKP1/BTB/POZ domain
G9_123104	LOC111366264	Oleur061Scf9140g04003	AT1G18250.2	Pathogenesis-related thaumatin superfamily protein	P83332	Thaumatin-like protein 1	IPR001938	Thaumatin
G9_45293	LOC111365702	Oleur061Scf2859g02016	AT3G54130.1	Josephin family protein	Q9M391	Ataxin-3 homolog	IPR006155	Josephin domain
G9_80682	LOC111365613	Oleur061Scf3440g00002	AT3G09030.1	BTB/POZ domain-containing protein	Q9S7R7	BTB/POZ domain-containing protein At3g09030	IPR011333::IPR015943	SKP1/BTB/POZ domain::WD40/YVTN repeat-like-containing domain
G9_59351	LOC111391739	Oleur061Scf1686g00009	AT3G53620.1	pyrophosphorylase 4	O48556	Soluble inorganic pyrophosphatase	IPR008162	Inorganic pyrophosphatase
G9_8009	LOC111365354	Oleur061Scf2310g00026	AT2G37010.1	non-intrinsic ABC protein 12	Q9FF46	ABC transporter G family member 28	IPR003439::IPR027417	ABC transporter-like::P-loop containing nucleoside triphosphate hydrolase
G9_129119	LOC111391730	Oleur061Scf1289g03024	AT5G03040.1	IQ-domain 2	Q9SF32	Protein IQ-DOMAIN 1	IPR000048	IQ motif, EF-hand binding site
G9_130080	LOC111365354	Oleur061Scf0793g06034	AT2G37010.1	non-intrinsic ABC protein 12	Q9FF46	ABC transporter G family member 28	IPR003439::IPR027417	ABC transporter-like::P-loop containing nucleoside triphosphate hydrolase
G9_128584	LOC111412986	Oleur061Scf0632g00006	AT3G09890.1	Ankyrin repeat family protein	Q6PFX9	Tankyrase-1	IPR020683	Ankyrin repeat-containing domain
G9_29669	LOC111412817
G9_100763	LOC111376334	Oleur061Scf8320g01043	AT2G36026.1	Ovate family protein	Q3EAL1	Transcription repressor OFP6	IPR006458	Ovate protein family, C-terminal
G9_126154	LOC111412466	Oleur061Scf4886g01035				Unknown protein
G9_5476	LOC111375959	Oleur061Scf2642g01034	AT3G11690.1			Unknown protein
G9_56664	LOC111373039	Oleur061Scf6451g02038	AT2G19260.1	RING/FYVE/PHD zinc finger superfamily protein		Unknown protein	IPR000949::IPR011124::IPR013083	ELM2 domain::Zinc finger, CW-type::Zinc finger, RING/FYVE/PHD-type
G9_15093	LOC111369829	Oleur061Scf1804g04021	AT5G20730.1	Transcriptional factor B3 family protein / auxin-responsive factor AUX/IAA-related	Q6Z2W3	Auxin response factor 5	IPR000270::IPR010525::IPR015300::IPR033389	PB1 domain::Auxin response factor::DNA-binding pseudobarrel domain::AUX/IAA domain
G9_3970	LOC111411799	Oleur061Scf7528g00013	AT4G33140.1	Haloacid dehalogenase-like hydrolase (HAD) superfamily protein		Unknown protein	IPR010708::IPR023214	5'3'-deoxyribonucleotidase::HAD-like domain
G9_20185	LOC111411799	Oleur061Scf7528g00013	AT4G33140.1	Haloacid dehalogenase-like hydrolase (HAD) superfamily protein		Unknown protein	IPR010708::IPR023214	5'3'-deoxyribonucleotidase::HAD-like domain
G9_38485	LOC111372813	Oleur061Scf7528g00003	AT3G43430.1	RING/U-box superfamily protein	Q9ZU51	E3 ubiquitin-protein ligase RHA2B	IPR013083	Zinc finger, RING/FYVE/PHD-type
G9_60537	LOC111369829	Oleur061Scf1804g04021	AT5G20730.1	Transcriptional factor B3 family protein / auxin-responsive factor AUX/IAA-related	Q6Z2W3	Auxin response factor 5	IPR000270::IPR010525::IPR015300::IPR033389	PB1 domain::Auxin response factor::DNA-binding pseudobarrel domain::AUX/IAA domain
G9_155119	LOC111372813	Oleur061Scf7528g00003	AT3G43430.1	RING/U-box superfamily protein	Q9ZU51	E3 ubiquitin-protein ligase RHA2B	IPR013083	Zinc finger, RING/FYVE/PHD-type
G9_161308	LOC111369829	Oleur061Scf1804g04021	AT5G20730.1	Transcriptional factor B3 family protein / auxin-responsive factor AUX/IAA-related	Q6Z2W3	Auxin response factor 5	IPR000270::IPR010525::IPR015300::IPR033389	PB1 domain::Auxin response factor::DNA-binding pseudobarrel domain::AUX/IAA domain
G9_201771	LOC111369829	Oleur061Scf1804g04021	AT5G20730.1	Transcriptional factor B3 family protein / auxin-responsive factor AUX/IAA-related	Q6Z2W3	Auxin response factor 5	IPR000270::IPR010525::IPR015300::IPR033389	PB1 domain::Auxin response factor::DNA-binding pseudobarrel domain::AUX/IAA domain
G9_112767	LOC111383877	Oleur061Scf5456g00021	AT5G57070.1	hydroxyproline-rich glycoprotein family protein		Unknown protein
G10_163023	LOC111390643	Oleur061Scf2831g00010	AT4G13750.1	Histidine kinase-, DNA gyrase B-, and HSP90-like ATPase family protein		Unknown protein
G10_187114	LOC111390643	Oleur061Scf2831g00010	AT4G13750.1	Histidine kinase-, DNA gyrase B-, and HSP90-like ATPase family protein		Unknown protein
G10_28935	LOC111381112	Oleur061Scf6444g00019	AT2G33100.1	cellulose synthase-like D1	O49323	Cellulose synthase-like protein D1	IPR005150::IPR029044	Cellulose synthase::Nucleotide-diphospho-sugar transferases
G10_143512	LOC111381112	Oleur061Scf6444g00019	AT2G33100.1	cellulose synthase-like D1	O49323	Cellulose synthase-like protein D1	IPR005150::IPR029044	Cellulose synthase::Nucleotide-diphospho-sugar transferases
G10_53591	LOC111371680	Oleur061Scf3414g01001	AT1G04510.1	MOS4-associated complex 3A	Q9AV81	Pre-mRNA-processing factor 19	IPR013083::IPR013915::IPR015943	Zinc finger, RING/FYVE/PHD-type::Pre-mRNA-splicing factor 19::WD40/YVTN repeat-like-containing domain
G10_64502	LOC111371590	Oleur061Scf0970g04011	AT4G14310.2	Transducin/WD40 repeat-like superfamily protein		Unknown protein	IPR011047::IPR015943	Quinoprotein alcohol dehydrogenase-like superfamily::WD40/YVTN repeat-like-containing domain
G10_64505	LOC111371117	Oleur061Scf0970g05009	AT4G14340.1	casein kinase I	Q6QNM1	Casein kinase I	IPR011009	Protein kinase-like domain
G10_82134	LOC111371590	Oleur061Scf1764g07004	AT4G14310.2	Transducin/WD40 repeat-like superfamily protein		Unknown protein	IPR011047::IPR015943	Quinoprotein alcohol dehydrogenase-like superfamily::WD40/YVTN repeat-like-containing domain
G10_85207	LOC111381036
G10_74646	LOC111381036
G10_14446	LOC111371594	Oleur061Scf1764g08004	AT4G14350.1	AGC (cAMP-dependent, cGMP-dependent and protein kinase C) kinase family protein	Q9Y2H1	Serine/threonine-protein kinase 38-like	IPR000961::IPR011009::IPR011993	AGC-kinase, C-terminal::Protein kinase-like domain::PH domain-like
G10_84739	LOC111371594	Oleur061Scf1764g08004	AT4G14350.1	AGC (cAMP-dependent, cGMP-dependent and protein kinase C) kinase family protein	Q9Y2H1	Serine/threonine-protein kinase 38-like	IPR000961::IPR011009::IPR011993	AGC-kinase, C-terminal::Protein kinase-like domain::PH domain-like
G10_12790	LOC111392641	Oleur061Scf8281g00023	AT4G14410.1	basic helix-loop-helix (bHLH) DNA-binding superfamily protein	Q8L467	Transcription factor bHLH104	IPR011598	Myc-type, basic helix-loop-helix bHLH domain
G10_134644	LOC111373529
G10_165898	LOC111371596	Oleur061Scf6576g00009	AT2G38940.1	phosphate transporter 1;4	Q96303	Inorganic phosphate transporter 1-4	IPR005828::IPR020846	Major facilitator, sugar transporter-like::Major facilitator superfamily domain
G10_78279	LOC111371608	Oleur061Scf2158g01007				Unknown protein
G10_82821	LOC111392641	Oleur061Scf8281g00023	AT4G14410.1	basic helix-loop-helix (bHLH) DNA-binding superfamily protein	Q8L467	Transcription factor bHLH104	IPR011598	Myc-type, basic helix-loop-helix bHLH domain
G10_49710	LOC111371718	Oleur061Scf3075g01020	AT4G24560.1	ubiquitin-specific protease 16	Q9SB51	Ubiquitin carboxyl-terminal hydrolase 16	IPR028889	Ubiquitin specific protease domain
G10_13236	LOC111371693	Oleur061Scf2260g01006	AT1G27600.1	Nucleotide-diphospho-sugar transferases superfamily protein		Unknown protein	IPR005027::IPR029044	Glycosyl transferase, family 43::Nucleotide-diphospho-sugar transferases
G10_40039	LOC111371645	Oleur061Scf2768g00011	AT4G14750.1	IQ-domain 19		Unknown protein	IPR000048::IPR025064	IQ motif, EF-hand binding site::Domain of unknown function DUF4005
G10_42426	LOC111373408	Oleur061Scf3163g01016	AT4G02590.1	basic helix-loop-helix (bHLH) DNA-binding superfamily protein	O22768	Transcription factor UNE12	IPR011598	Myc-type, basic helix-loop-helix bHLH domain
G10_43376	LOC111371651	Oleur061Scf3724g00004	AT3G63250.1	homocysteine methyltransferase 2	Q9M1W4	Homocysteine S-methyltransferase 2	IPR003726	Homocysteine-binding domain
G10_92327	LOC111371693	Oleur061Scf2260g01006	AT1G27600.1	Nucleotide-diphospho-sugar transferases superfamily protein		Unknown protein	IPR005027::IPR029044	Glycosyl transferase, family 43::Nucleotide-diphospho-sugar transferases
G10_121086	LOC111373401	Oleur061Scf0481g03008				Unknown protein	IPR031102	RNA polymerase-associated protein Rtf1
G10_128626	LOC111371176	Oleur061Scf3535g02017	AT3G07810.2	RNA-binding (RRM/RBD/RNP motifs) family protein	Q9C652	RNA-binding protein 1	IPR000504	RNA recognition motif domain
G10_143660	LOC111371645	Oleur061Scf2768g00011	AT4G14750.1	IQ-domain 19		Unknown protein	IPR000048::IPR025064	IQ motif, EF-hand binding site::Domain of unknown function DUF4005
G10_167378	LOC111371711	Oleur061Scf3042g00002	AT4G37930.1	serine transhydroxymethyltransferase 1	P50433	Serine hydroxymethyltransferase, mitochondrial	IPR001085::IPR015424	Serine hydroxymethyltransferase::Pyridoxal phosphate-dependent transferase
G10_173483	LOC111373401	Oleur061Scf0481g03008				Unknown protein	IPR031102	RNA polymerase-associated protein Rtf1
G10_103164	LOC111371651	Oleur061Scf3724g00004	AT3G63250.1	homocysteine methyltransferase 2	Q9M1W4	Homocysteine S-methyltransferase 2	IPR003726	Homocysteine-binding domain
G10_22671	LOC111371731	Oleur061Scf6802g00019	AT5G46290.3	3-ketoacyl-acyl carrier protein synthase I	P73283	3-oxoacyl-[acyl-carrier-protein] synthase 2	IPR020841	Polyketide synthase, beta-ketoacyl synthase domain
G10_25205	LOC111371731	Oleur061Scf6802g00019	AT5G46290.3	3-ketoacyl-acyl carrier protein synthase I	P73283	3-oxoacyl-[acyl-carrier-protein] synthase 2	IPR020841	Polyketide synthase, beta-ketoacyl synthase domain
G10_56270	LOC111371784	Oleur061Scf5902g00024	AT5G41210.1	glutathione S-transferase THETA 1	P30713	Glutathione S-transferase theta-2	IPR010987::IPR012336	Glutathione S-transferase, C-terminal-like::Thioredoxin-like fold
G10_71699	LOC111392693	Oleur061Scf7058g00005	AT5G11710.1	ENTH/VHS family protein	Q8VY07	Clathrin interactor EPSIN 1	IPR008942	ENTH/VHS
G10_109557	LOC111375894	Oleur061Scf3024g00024	AT5G44500.1	Small nuclear ribonucleoprotein family protein	Q9TU67	Small nuclear ribonucleoprotein-associated protein B'	IPR010920::IPR017131	LSM domain::Small ribonucleoprotein associated, SmB/SmN
G10_174325	LOC111392693	Oleur061Scf7058g00005	AT5G11710.1	ENTH/VHS family protein	Q8VY07	Clathrin interactor EPSIN 1	IPR008942	ENTH/VHS
G10_189840	LOC111375894	Oleur061Scf3024g00024	AT5G44500.1	Small nuclear ribonucleoprotein family protein	Q9TU67	Small nuclear ribonucleoprotein-associated protein B'	IPR010920::IPR017131	LSM domain::Small ribonucleoprotein associated, SmB/SmN
G10_35025	LOC111371807	Oleur061Scf3178g03016	AT2G25050.2	Actin-binding FH2 (Formin Homology) protein	Q9SK28	Formin-like protein 18	IPR000008::IPR015425::IPR029021	C2 domain::Formin, FH2 domain::Protein-tyrosine phosphatase-like
G10_14312	LOC111386754	Oleur061Scf1207g00042	AT4G17520.1	Hyaluronan / mRNA binding family		Unknown protein	IPR006861::IPR019084	Hyaluronan/mRNA-binding protein::Stm1-like, N-terminal
G10_16494	LOC111386767	Oleur061Scf2665g01006	AT4G17500.1	ethylene responsive element binding factor 1	O80338	Ethylene-responsive transcription factor 2	IPR016177	DNA-binding domain
G10_16552	LOC111386754	Oleur061Scf2665g01023	AT4G17520.1	Hyaluronan / mRNA binding family		Unknown protein	IPR006861::IPR019084	Hyaluronan/mRNA-binding protein::Stm1-like, N-terminal
G10_17759	LOC111386767	Oleur061Scf2665g01006	AT4G17500.1	ethylene responsive element binding factor 1	O80338	Ethylene-responsive transcription factor 2	IPR016177	DNA-binding domain
G10_22159	LOC111377753	Oleur061Scf7745g01002	AT5G47060.1	Protein of unknown function (DUF581)		Unknown protein	IPR007650	Zf-FLZ domain
G10_34594	LOC111377753	Oleur061Scf3321g00005	AT5G47060.1	Protein of unknown function (DUF581)		Unknown protein	IPR007650	Zf-FLZ domain
G10_37897	LOC111408121	Oleur061Scf0732g01024	AT4G17970.1	aluminum-activated, malate transporter 12	O49696	Aluminum-activated malate transporter 12	IPR020966	Aluminum-activated malate transporter
G10_44126	LOC111386767	Oleur061Scf0345g00008	AT4G17500.1	ethylene responsive element binding factor 1	Q40479	Ethylene-responsive transcription factor 2	IPR016177	DNA-binding domain
G10_80999	LOC111386754	Oleur061Scf2665g01023	AT4G17520.1	Hyaluronan / mRNA binding family		Unknown protein	IPR006861::IPR019084	Hyaluronan/mRNA-binding protein::Stm1-like, N-terminal
G10_85860	LOC111386767	Oleur061Scf2665g01006	AT4G17500.1	ethylene responsive element binding factor 1	O80338	Ethylene-responsive transcription factor 2	IPR016177	DNA-binding domain
G10_135634	LOC111386754	Oleur061Scf2665g01023	AT4G17520.1	Hyaluronan / mRNA binding family		Unknown protein	IPR006861::IPR019084	Hyaluronan/mRNA-binding protein::Stm1-like, N-terminal
G10_168578	LOC111408121	Oleur061Scf0732g01024	AT4G17970.1	aluminum-activated, malate transporter 12	O49696	Aluminum-activated malate transporter 12	IPR020966	Aluminum-activated malate transporter
G10_65200	LOC111386772	Oleur061Scf1901g00024	AT4G16760.1	acyl-CoA oxidase 1	O65202	Peroxisomal acyl-coenzyme A oxidase 1	IPR009075::IPR009100::IPR013786	Acyl-CoA dehydrogenase/oxidase C-terminal::Acyl-CoA dehydrogenase/oxidase, N-terminal and middle domain::Acyl-CoA dehydrogenase/oxidase, N-terminal
G10_13228	LOC111386771	Oleur061Scf2665g00020			Q9SKK8	RING-H2 finger protein ATL22
G10_51105	LOC111386771	Oleur061Scf2665g00020			Q9SKK8	RING-H2 finger protein ATL22
G10_102746	LOC111386751	Oleur061Scf1901g00014	AT5G47390.1	myb-like transcription factor family protein	Q2V9B0	Transcription factor MYB1R1	IPR009057	Homeobox domain-like
G10_29400	LOC111386772	Oleur061Scf1901g00024	AT4G16760.1	acyl-CoA oxidase 1	O65202	Peroxisomal acyl-coenzyme A oxidase 1	IPR009075::IPR009100::IPR013786	Acyl-CoA dehydrogenase/oxidase C-terminal::Acyl-CoA dehydrogenase/oxidase, N-terminal and middle domain::Acyl-CoA dehydrogenase/oxidase, N-terminal
G10_81789	LOC111386772	Oleur061Scf1901g00024	AT4G16760.1	acyl-CoA oxidase 1	O65202	Peroxisomal acyl-coenzyme A oxidase 1	IPR009075::IPR009100::IPR013786	Acyl-CoA dehydrogenase/oxidase C-terminal::Acyl-CoA dehydrogenase/oxidase, N-terminal and middle domain::Acyl-CoA dehydrogenase/oxidase, N-terminal
G10_485	LOC111391056	Oleur061Scf5625g00005	AT4G09670.1	Oxidoreductase family protein	Q642M9	Trans-1,2-dihydrobenzene-1,2-diol dehydrogenase	IPR016040	NADP-binding domain
G10_20598	LOC111391080	Oleur061Scf3315g08032	AT1G34210.1	somatic embryogenesis receptor-like kinase 2	Q94AG2	Somatic embryogenesis receptor kinase 1	IPR011009::IPR013210::IPR013320::IPR032675	Protein kinase-like domain::Leucine-rich repeat-containing N-terminal, plant-type::Concanavalin A-like lectin/glucanase domain::Leucine-rich repeat domain, L domain-like
G10_42703	LOC111380634	Oleur061Scf4174g00005	AT1G21320.1	nucleotide binding;nucleic acid binding	Q8H0P8	RNA-binding protein 1	IPR000504	RNA recognition motif domain
G10_74904	LOC111380635	Oleur061Scf1100g09015	AT4G36810.1	geranylgeranyl pyrophosphate synthase 1	P80042	Geranylgeranyl pyrophosphate synthase, chloroplastic	IPR000092	Polyprenyl synthetase
G10_144305	LOC111380629	Oleur061Scf1100g10014	AT1G43700.1	VIRE2-interacting protein 1	Q9MA75	Transcription factor VIP1	IPR004827	Basic-leucine zipper domain
G10_49406	LOC111386751	Oleur061Scf1901g00014	AT5G47390.1	myb-like transcription factor family protein	Q2V9B0	Transcription factor MYB1R1	IPR009057	Homeobox domain-like
G10_32795	LOC111391081	Oleur061Scf4132g00021	AT1G27752.1	Ubiquitin system component Cue protein	Q91WR3	Activating signal cointegrator 1 complex subunit 2	IPR009060	UBA-like
G10_125175	LOC111375755	Oleur061Scf0566g05013	AT3G61740.1	SET domain protein 14	Q03164	Histone-lysine N-methyltransferase 2A	IPR001214::IPR003616::IPR013083::IPR032308	SET domain::Post-SET domain::Zinc finger, RING/FYVE/PHD-type::Jas TPL-binding domain
G11_24069	LOC111395860	Oleur061Scf0410g07042	AT1G16330.1	cyclin b3;1	Q39067	Cyclin-B1-2	IPR013763	Cyclin-like
G11_23988	LOC111368188	Oleur061Scf6568g00026	AT5G10770.1	Eukaryotic aspartyl protease family protein	Q8S9J6	Aspartyl protease family protein At5g10770	IPR001461::IPR021109::IPR032799::IPR032861	Aspartic peptidase A1 family::Aspartic peptidase domain::Xylanase inhibitor, C-terminal::Xylanase inhibitor, N-terminal
G11_120325	LOC111395917	Oleur061Scf3572g01011	AT5G47690.3	binding	Q498H0	Sister chromatid cohesion protein PDS5 homolog B-A	IPR016024	Armadillo-type fold
G11_134433	LOC111368188	Oleur061Scf6568g00026	AT5G10770.1	Eukaryotic aspartyl protease family protein	Q8S9J6	Aspartyl protease family protein At5g10770	IPR001461::IPR021109::IPR032799::IPR032861	Aspartic peptidase A1 family::Aspartic peptidase domain::Xylanase inhibitor, C-terminal::Xylanase inhibitor, N-terminal
G11_2967	LOC111395927	Oleur061Scf5954g00004	AT1G62360.1	KNOX/ELK homeobox transcription factor	P46639	Homeobox protein knotted-1-like 1	IPR005539::IPR005540::IPR005541::IPR009057	ELK domain::KNOX1::KNOX2::Homeobox domain-like
G11_83020	LOC111395946	Oleur061Scf1458g01001	AT1G62280.1	SLAC1 homologue 1	Q5E930	S-type anion channel SLAH1	IPR004695	Voltage-dependent anion channel
G11_157727	LOC111382468	Oleur061Scf2492g00006	AT5G57230.1	Thioredoxin superfamily protein		Unknown protein	IPR012336	Thioredoxin-like fold
G11_68963	LOC111395957	Oleur061Scf0769g07006	AT1G61850.1	phospholipases;galactolipases	F4HX15	Phospholipase A I	IPR001611::IPR003591::IPR016024::IPR016035::IPR032675	Leucine-rich repeat::Leucine-rich repeat, typical subtype::Armadillo-type fold::Acyl transferase/acyl hydrolase/lysophospholipase::Leucine-rich repeat domain, L domain-like
G11_128192	LOC111396527
G11_13883	LOC111396100	Oleur061Scf9158g05005	AT1G24300.1	GYF domain-containing protein		Unknown protein	IPR003169	GYF domain
G11_57140	LOC111378361	Oleur061Scf2076g00028	AT5G13010.1	RNA helicase family protein	F4K2E9	Pre-mRNA-splicing factor ATP-dependent RNA helicase DEAH7	IPR001650::IPR007502::IPR011709::IPR014001::IPR027417	Helicase, C-terminal::Helicase-associated domain::Domain of unknown function DUF1605::Helicase superfamily 1/2, ATP-binding domain::P-loop containing nucleoside triphosphate hydrolase
G11_49420	LOC111396527
G11_61217	LOC111378361	Oleur061Scf5474g08023	AT5G13010.1	RNA helicase family protein	F4K2E9	Pre-mRNA-splicing factor ATP-dependent RNA helicase DEAH7	IPR001650::IPR007502::IPR011709::IPR014001::IPR018647::IPR027417	Helicase, C-terminal::Helicase-associated domain::Domain of unknown function DUF1605::Helicase superfamily 1/2, ATP-binding domain::Domain of unknown function DUF2075::P-loop containing nucleoside triphosphate hydrolase
G11_100571	LOC111396148	Oleur061Scf9158g01011	AT5G53150.1	DNAJ heat shock N-terminal domain-containing protein	Q149L6	DnaJ homolog subfamily B member 14	IPR001623::IPR024593	DnaJ domain::Domain of unknown function DUF3444
G11_125439	LOC111396145	Oleur061Scf9158g01013	AT5G43270.2	squamosa promoter binding protein-like 2	A2YGR5	Squamosa promoter-binding-like protein 12	IPR004333	Transcription factor, SBP-box
G11_170158	LOC111395254	Oleur061Scf9158g09001	AT2G33490.1	hydroxyproline-rich glycoprotein family protein		Unknown protein	IPR027267	Arfaptin homology AH domain/BAR domain
G11_6420	LOC111378359	Oleur061Scf5474g08024	AT1G67490.1	glucosidase 1	F4HTM3	Mannosyl-oligosaccharide glucosidase GCS1	IPR004888::IPR031631	Glycoside hydrolase family 63::Glycosyl hydrolase family 63, N-terminal
G11_46799	LOC111395254	Oleur061Scf9158g09001	AT2G33490.1	hydroxyproline-rich glycoprotein family protein		Unknown protein	IPR027267	Arfaptin homology AH domain/BAR domain
G11_61067	LOC111396148	Oleur061Scf9158g01011	AT5G53150.1	DNAJ heat shock N-terminal domain-containing protein	Q149L6	DnaJ homolog subfamily B member 14	IPR001623::IPR024593	DnaJ domain::Domain of unknown function DUF3444
G11_83679	LOC111378362	Oleur061Scf5474g08022	AT3G01810.1			Unknown protein	IPR019448	EEIG1/EHBP1 N-terminal domain
G11_121752	LOC111378362	Oleur061Scf5474g08022	AT3G01810.1			Unknown protein	IPR019448	EEIG1/EHBP1 N-terminal domain
G11_126672	LOC111378362	Oleur061Scf5474g08022	AT3G01810.1			Unknown protein	IPR019448	EEIG1/EHBP1 N-terminal domain
G11_174687	LOC111378361	Oleur061Scf5474g08023	AT5G13010.1	RNA helicase family protein	F4K2E9	Pre-mRNA-splicing factor ATP-dependent RNA helicase DEAH7	IPR001650::IPR007502::IPR011709::IPR014001::IPR018647::IPR027417	Helicase, C-terminal::Helicase-associated domain::Domain of unknown function DUF1605::Helicase superfamily 1/2, ATP-binding domain::Domain of unknown function DUF2075::P-loop containing nucleoside triphosphate hydrolase
G11_53207	LOC111376610	Oleur061Scf3346g02026	AT1G13190.1	RNA-binding (RRM/RBD/RNP motifs) family protein	Q9VSH4	Cleavage and polyadenylation specificity factor subunit CG7185	IPR000504	RNA recognition motif domain
G11_37884	LOC111387932	Oleur061Scf2666g06024	AT1G59820.1	aminophospholipid ATPase 3	Q9XIE6	Phospholipid-transporting ATPase 3	IPR001757::IPR023214::IPR032630::IPR032631	P-type ATPase::HAD-like domain::P-type ATPase, C-terminal::P-type ATPase, N-terminal
G11_38231	LOC111387952	Oleur061Scf2666g07007	AT5G23400.1	Leucine-rich repeat (LRR) family protein	Q9LHP4	Receptor-like protein kinase 2	IPR001611::IPR003591::IPR013210::IPR032675	Leucine-rich repeat::Leucine-rich repeat, typical subtype::Leucine-rich repeat-containing N-terminal, plant-type::Leucine-rich repeat domain, L domain-like
G11_168268	LOC111387957	Oleur061Scf8103g02047	AT2G02590.1			Unknown protein	IPR009577	Putative small multi-drug export
G11_8646	LOC111372516	Oleur061Scf6933g01017	AT1G69800.2	Cystathionine beta-synthase (CBS) protein	Q9CAR3	SNF1-related protein kinase regulatory subunit gamma-1-like	IPR000644	CBS domain
G11_25274	LOC111396211	Oleur061Scf7465g01010	AT5G46110.4	Glucose-6-phosphate/phosphate translocator-related	P21727	Triose phosphate/phosphate translocator, chloroplastic	IPR004696::IPR004853	Triose phosphate/phosphoenolpyruvate translocator::Sugar phosphate transporter domain
G11_79091	LOC111396199	Oleur061Scf9160g10012	AT5G15210.1	homeobox protein 30	Q9LXG0	Zinc-finger homeodomain protein 8	IPR006456::IPR009057	ZF-HD homeobox protein, Cys/His-rich dimerisation domain::Homeobox domain-like
G11_113012	LOC111372518	Oleur061Scf8258g00016	AT1G14340.1	RNA-binding (RRM/RBD/RNP motifs) family protein	Q9LFD5	Binding partner of ACD11 1	IPR000504	RNA recognition motif domain
G11_186517	LOC111372518	Oleur061Scf8258g00016	AT1G14340.1	RNA-binding (RRM/RBD/RNP motifs) family protein	Q9LFD5	Binding partner of ACD11 1	IPR000504	RNA recognition motif domain
G11_149358	LOC111380382	Oleur061Scf2429g02014	AT1G58100.1	TCP family transcription factor	Q9C518	Transcription factor TCP8	IPR005333	Transcription factor, TCP
G11_163457	LOC111368174	Oleur061Scf2411g01014	AT5G44370.1	phosphate transporter 4;6	Q5W8I8	Vesicular glutamate transporter 2.1	IPR011701::IPR020846	Major facilitator superfamily::Major facilitator superfamily domain
G11_82514	LOC111404152	Oleur061Scf0162g01003	AT5G10790.1	ubiquitin-specific protease 22	Q9LEW0	Ubiquitin carboxyl-terminal hydrolase 22	IPR001607::IPR013083::IPR028889	Zinc finger, UBP-type::Zinc finger, RING/FYVE/PHD-type::Ubiquitin specific protease domain
G11_119975	LOC111378200	Oleur061Scf0162g05035	AT2G24610.1	cyclic nucleotide-gated channel 14		Unknown protein	IPR005821::IPR014710	Ion transport domain::RmlC-like jelly roll fold
G11_70035	LOC111387106	Oleur061Scf1183g06004	AT1G44110.1	Cyclin A1;1	Q9C6Y3	Cyclin-A1-1	IPR013763	Cyclin-like
G11_98432	LOC111385230	Oleur061Scf8526g00003			Q9LMP1	Wall-associated receptor kinase 2	IPR000742::IPR025287	EGF-like domain::Wall-associated receptor kinase, galacturonan-binding domain
G11_3563	LOC111395395	Oleur061Scf9159g08018	AT2G01910.1	Microtubule associated protein (MAP65/ASE1) family protein	Q9SIS3	65-kDa microtubule-associated protein 6	IPR007145	Microtubule-associated protein, MAP65/Ase1/PRC1
G11_14783	LOC111411679	Oleur061Scf1179g01029	AT1G09050.1			Unknown protein	IPR009057	Homeobox domain-like
G11_18843	LOC111396358	Oleur061Scf1179g02015	AT2G28780.1			Unknown protein
G11_22958	LOC111392203	Oleur061Scf1371g00024	AT5G62090.1	SEUSS-like 2	Q8W234	Transcriptional corepressor SEUSS	IPR029005	LIM-domain binding protein/SEUSS
G11_28750	LOC111392846	Oleur061Scf4406g11009	AT1G73840.1	hydroxyproline-rich glycoprotein family protein		Unknown protein	IPR025742::IPR026896	Cleavage stimulation factor subunit 2, hinge domain::Transcription termination and cleavage factor, C-terminal domain
G11_37535	LOC111396335	Oleur061Scf5097g05026	AT2G01440.1	DEAD/DEAH box RNA helicase family protein	F4INA9	ATP-dependent DNA helicase homolog RECG, chloroplastic	IPR012340	Nucleic acid-binding, OB-fold
G11_47692	LOC111392393	Oleur061Scf8722g00006	AT4G23720.1	Protein of unknown function (DUF1191)		Unknown protein	IPR010605	Protein of unknown function DUF1191
G11_48687	LOC111395367	Oleur061Scf7524g00001	AT1G32190.1	alpha/beta-Hydrolases superfamily protein	Q5ZJ01	Protein ABHD17B	IPR022742::IPR029058	Serine aminopeptidase, S33::Alpha/Beta hydrolase fold
G11_48839	LOC111392400	Oleur061Scf0734g01022	AT1G64160.1	Disease resistance-responsive (dirigent-like protein) family protein	P13240	Disease resistance response protein 206	IPR004265	Plant disease resistance response protein
G11_59405	LOC111395361	Oleur061Scf3294g00003				Unknown protein
G11_72197	LOC111395400	Oleur061Scf9159g06022	AT1G34300.1	lectin protein kinase family protein	Q9FLV4	G-type lectin S-receptor-like serine/threonine-protein kinase At5g24080	IPR000858::IPR001480::IPR003609::IPR011009::IPR013032::IPR013320::IPR024171	S-locus glycoprotein domain::Bulb-type lectin domain::PAN/Apple domain::Protein kinase-like domain::EGF-like, conserved site::Concanavalin A-like lectin/glucanase domain::S-receptor-like serine/threonine-protein kinase
G11_73746	LOC111375128	Oleur061Scf9141g01014	AT1G63490.1	transcription factor jumonji (jmjC) domain-containing protein	Q80Y84	Lysine-specific demethylase 5B	IPR001606::IPR003347::IPR003349::IPR004198::IPR013083::IPR013637	ARID DNA-binding domain::JmjC domain::JmjN domain::Zinc finger, C5HC2-type::Zinc finger, RING/FYVE/PHD-type::Lysine-specific demethylase-like domain
G11_87094	LOC111395417	Oleur061Scf9159g04024	AT5G13970.1			Unknown protein	IPR029338	Tumour suppressing sub-chromosomal transferable candidate 4
G11_106938	LOC111395400	Oleur061Scf9159g06022	AT1G34300.1	lectin protein kinase family protein	Q9FLV4	G-type lectin S-receptor-like serine/threonine-protein kinase At5g24080	IPR000858::IPR001480::IPR003609::IPR011009::IPR013032::IPR013320::IPR024171	S-locus glycoprotein domain::Bulb-type lectin domain::PAN/Apple domain::Protein kinase-like domain::EGF-like, conserved site::Concanavalin A-like lectin/glucanase domain::S-receptor-like serine/threonine-protein kinase
G11_112275	LOC111375129
G11_189152	LOC111383185	Oleur061Scf7973g03008	AT1G24764.1	microtubule-associated proteins 70-2	Q8L7S4	Microtubule-associated protein 70-2	IPR009768	Microtubule-associated protein 70
G11_189939	LOC111392203	Oleur061Scf1371g00024	AT5G62090.1	SEUSS-like 2	Q8W234	Transcriptional corepressor SEUSS	IPR029005	LIM-domain binding protein/SEUSS
G11_104686	LOC111396335	Oleur061Scf5097g05026	AT2G01440.1	DEAD/DEAH box RNA helicase family protein	F4INA9	ATP-dependent DNA helicase homolog RECG, chloroplastic	IPR012340	Nucleic acid-binding, OB-fold
G11_11190	LOC111408104	Oleur061Scf8661g02020	AT3G25900.1	Homocysteine S-methyltransferase family protein	A4ZGQ8	Homocysteine S-methyltransferase 1	IPR003726	Homocysteine-binding domain
G11_54296	LOC111396262	Oleur061Scf7845g01018	AT1G13330.1	Arabidopsis Hop2 homolog	Q9FX64	Homologous-pairing protein 2 homolog	IPR010776	Homologous-pairing protein 2
G11_105809	LOC111396304	Oleur061Scf2044g00006	AT3G18290.1	zinc finger protein-related	Q96PM5	RING finger and CHY zinc finger domain-containing protein 1	IPR008913::IPR012312::IPR013083::IPR017921	Zinc finger, CHY-type::Haemerythrin-like::Zinc finger, RING/FYVE/PHD-type::Zinc finger, CTCHY-type
G11_135031	LOC111408104	Oleur061Scf8661g02020	AT3G25900.1	Homocysteine S-methyltransferase family protein	A4ZGQ8	Homocysteine S-methyltransferase 1	IPR003726	Homocysteine-binding domain
G11_170773	LOC111396546	Oleur061Scf3948g02004				Unknown protein	IPR005333	Transcription factor, TCP
G11_184589	LOC111396245	Oleur061Scf0274g01024	AT1G13560.1	aminoalcoholphosphotransferase 1	O82567	Choline/ethanolaminephosphotransferase 1	IPR000462	CDP-alcohol phosphatidyltransferase
G12_98333	LOC111369220	Oleur061Scf4406g03005	AT3G23240.1	ethylene response factor 1	Q8LDC8	Ethylene-responsive transcription factor 1B	IPR016177	DNA-binding domain
G12_100901	LOC111369220	Oleur061Scf4406g03005	AT3G23240.1	ethylene response factor 1	Q8LDC8	Ethylene-responsive transcription factor 1B	IPR016177	DNA-binding domain
G12_126453	LOC111369221	Oleur061Scf4406g03003				Unknown protein
G12_110067	LOC111369528	Oleur061Scf4406g02003	AT5G37720.1	ALWAYS EARLY 4	Q6NQ72	THO complex subunit 4D	IPR000504::IPR025715	RNA recognition motif domain::Chromatin target of PRMT1 protein, C-terminal
G12_107604	LOC111369529	Oleur061Scf4406g02020	AT5G46800.1	Mitochondrial substrate carrier family protein	Q93XM7	Mitochondrial carnitine/acylcarnitine carrier-like protein	IPR018108::IPR023395	Mitochondrial substrate/solute carrier::Mitochondrial carrier domain
G12_166054	LOC111369568	Oleur061Scf9165g08008	AT5G10350.1	RNA-binding (RRM/RBD/RNP motifs) family protein	Q9LX90	Polyadenylate-binding protein 3
G12_104622	LOC111390415	Oleur061Scf0626g15003	AT5G26170.1	WRKY DNA-binding protein 50		Unknown protein	IPR003657	WRKY domain
G12_23170	LOC111390418	Oleur061Scf1525g00030	AT5G64700.1	nodulin MtN21 /EamA-like transporter family protein	Q9FGG3	WAT1-related protein At5g64700	IPR000620::IPR030184	EamA domain::WAT1-related protein
G12_101626	LOC111367199	Oleur061Scf6877g00010	AT4G34440.1	Protein kinase superfamily protein	Q8GX23	Proline-rich receptor-like protein kinase PERK5	IPR011009	Protein kinase-like domain
G12_68888	LOC111377008	Oleur061Scf2564g01060	AT3G57730.1	Protein kinase superfamily protein	Q9LMP1	Wall-associated receptor kinase 2	IPR011009	Protein kinase-like domain
G12_1640	LOC111382814	Oleur061Scf3920g03016	AT3G53440.1	Homeodomain-like superfamily protein		Unknown protein	IPR009057	Homeobox domain-like
G12_92350	LOC111382796	Oleur061Scf7970g03003	AT5G38660.1	acclimation of photosynthesis to environment	Q55403	Thylakoid membrane protein slr0575	IPR021275	Protein of unknown function DUF2854
G12_157631	LOC111382798
G12_30946	LOC111385567	Oleur061Scf7534g00011	AT3G47950.1	H(+)-ATPase 4	Q7XPY2	Plasma membrane ATPase	IPR001757::IPR004014::IPR023214::IPR023298	P-type ATPase::Cation-transporting P-type ATPase, N-terminal::HAD-like domain::P-type ATPase, transmembrane domain
G12_51705	LOC111392218	Oleur061Scf7334g00020	AT3G27580.1	Protein kinase superfamily protein	Q05999	Serine/threonine-protein kinase D6PKL3	IPR011009	Protein kinase-like domain
G12_142466	LOC111392218	Oleur061Scf7334g00020	AT3G27580.1	Protein kinase superfamily protein	Q05999	Serine/threonine-protein kinase D6PKL3	IPR011009	Protein kinase-like domain
G12_4207	LOC111365423
G12_74167	LOC111373314	Oleur061Scf2710g02018	AT1G23300.1	MATE efflux family protein	F4I4Q3	Protein DETOXIFICATION 32
G12_114898	LOC111365423
G12_70327	LOC111365447
G13_4747	LOC111384596	Oleur061Scf3248g00004				Unknown protein
G13_12779	LOC111365927
G13_15091	LOC111365938	Oleur061Scf7210g01037	AT2G42080.1	Chaperone DnaJ-domain superfamily protein		Unknown protein	IPR001623	DnaJ domain
G13_44911	LOC111365948	Oleur061Scf7869g05035	AT5G47610.1	RING/U-box superfamily protein	Q9FGJ6	RING-H2 finger protein ATL79	IPR013083	Zinc finger, RING/FYVE/PHD-type
G13_23398	LOC111365927
G13_42465	LOC111365887	Oleur061Scf9056g02015	AT1G80270.1	PENTATRICOPEPTIDE REPEAT 596	Q9C977	Pentatricopeptide repeat-containing protein At1g80270, mitochondrial	IPR002885::IPR011990	Pentatricopeptide repeat::Tetratricopeptide-like helical domain
G13_49242	LOC111365756	Oleur061Scf7210g01007			Q9M2P8	VQ motif-containing protein 25	IPR008889	VQ
G13_50395	LOC111365890	Oleur061Scf9056g03049	AT3G12250.4	TGACG motif-binding factor 6	Q39140	Transcription factor TGA6	IPR004827::IPR025422	Basic-leucine zipper domain::Transcription factor TGA like domain
G13_51407	LOC111365950	Oleur061Scf7869g07014	AT2G41740.1	villin 2	O81644	Villin-2	IPR007122::IPR029006	Villin/Gelsolin::ADF-H/Gelsolin-like domain
G13_62279	LOC111413007	Oleur061Scf2899g01021	AT5G06150.1	Cyclin family protein	P34800	G2/mitotic-specific cyclin-1	IPR013763	Cyclin-like
G13_77256	LOC111365891	Oleur061Scf9056g03051			Q9T048	Disease resistance protein At4g27190	IPR002182::IPR027417::IPR032675	NB-ARC::P-loop containing nucleoside triphosphate hydrolase::Leucine-rich repeat domain, L domain-like
G13_111539	LOC111365938	Oleur061Scf0336g03049	AT2G42080.1	Chaperone DnaJ-domain superfamily protein		Unknown protein	IPR001623	DnaJ domain
G13_115695	LOC111365890	Oleur061Scf9056g03049	AT3G12250.4	TGACG motif-binding factor 6	Q39140	Transcription factor TGA6	IPR004827::IPR025422	Basic-leucine zipper domain::Transcription factor TGA like domain
G13_124916	LOC111365887	Oleur061Scf9056g02015	AT1G80270.1	PENTATRICOPEPTIDE REPEAT 596	Q9C977	Pentatricopeptide repeat-containing protein At1g80270, mitochondrial	IPR002885::IPR011990	Pentatricopeptide repeat::Tetratricopeptide-like helical domain
G13_163089	LOC111365950	Oleur061Scf7869g07014	AT2G41740.1	villin 2	O81644	Villin-2	IPR007122::IPR029006	Villin/Gelsolin::ADF-H/Gelsolin-like domain
G13_9043	LOC111413003	Oleur061Scf2899g02030	AT1G68570.1	Major facilitator superfamily protein	Q9SX20	Protein NRT1/ PTR FAMILY 3.1	IPR000109::IPR020846	Proton-dependent oligopeptide transporter family::Major facilitator superfamily domain
G13_10857	LOC111413006	Oleur061Scf2899g01004	AT3G10760.1	Homeodomain-like superfamily protein	Q8H7S7	Two-component response regulator ORR21	IPR009057	Homeobox domain-like
G13_34828	LOC111365916
G13_171347	LOC111391097	Oleur061Scf5030g00003	AT1G57860.1	Translation protein SH3-like family protein	Q9FDZ9	60S ribosomal protein L21-2	IPR001147	Ribosomal protein L21e
G13_8167	LOC111365991	Oleur061Scf4871g00011	AT5G57660.1	CONSTANS-like 5	Q39057	Zinc finger protein CONSTANS	IPR000315::IPR010402	B-box-type zinc finger::CCT domain
G13_46373	LOC111375422	Oleur061Scf0020g05004	AT1G62640.1	3-ketoacyl-acyl carrier protein synthase III	B0JXE2	3-oxoacyl-[acyl-carrier-protein] synthase 3	IPR004655	3-oxoacyl-[acyl-carrier-protein] synthase 3
G13_107680	LOC111383546	Oleur061Scf3524g01017	AT4G30160.2	villin 4	O65570	Villin-4	IPR003128::IPR007122::IPR029006	Villin headpiece::Villin/Gelsolin::ADF-H/Gelsolin-like domain
G13_15198	LOC111383546	Oleur061Scf3524g01017	AT4G30160.2	villin 4	O65570	Villin-4	IPR003128::IPR007122::IPR029006	Villin headpiece::Villin/Gelsolin::ADF-H/Gelsolin-like domain
G13_73859	LOC111375422	Oleur061Scf0020g05004	AT1G62640.1	3-ketoacyl-acyl carrier protein synthase III	B0JXE2	3-oxoacyl-[acyl-carrier-protein] synthase 3	IPR004655	3-oxoacyl-[acyl-carrier-protein] synthase 3
G13_100686	LOC111384596	Oleur061Scf3248g00004				Unknown protein
G13_118580	LOC111383546	Oleur061Scf3524g01017	AT4G30160.2	villin 4	O65570	Villin-4	IPR003128::IPR007122::IPR029006	Villin headpiece::Villin/Gelsolin::ADF-H/Gelsolin-like domain
G13_163784	LOC111413003	Oleur061Scf2899g02030	AT1G68570.1	Major facilitator superfamily protein	Q9SX20	Protein NRT1/ PTR FAMILY 3.1	IPR000109::IPR020846	Proton-dependent oligopeptide transporter family::Major facilitator superfamily domain
G13_2494	LOC111366004	Oleur061Scf2054g00012	AT3G17380.1	TRAF-like family protein	Q9M2I0	MATH domain and coiled-coil domain-containing protein At3g58360	IPR008974	TRAF-like
G13_4841	LOC111366004	Oleur061Scf2054g00012	AT3G17380.1	TRAF-like family protein	Q9M2I0	MATH domain and coiled-coil domain-containing protein At3g58360	IPR008974	TRAF-like
G13_32703	LOC111365998	Oleur061Scf7062g05053	AT3G17360.1	phragmoplast orienting kinesin 1	Q9GYZ0	Kinesin-like protein KIF15	IPR001752::IPR027417	Kinesin motor domain::P-loop containing nucleoside triphosphate hydrolase
G13_46372	LOC111365998	Oleur061Scf7062g05053	AT3G17360.1	phragmoplast orienting kinesin 1	Q9GYZ0	Kinesin-like protein KIF15	IPR001752::IPR027417	Kinesin motor domain::P-loop containing nucleoside triphosphate hydrolase
G13_48049	LOC111377435	Oleur061Scf0154g02046	AT4G16070.1	Mono-/di-acylglycerol lipase, N-terminal;Lipase, class 3		Unknown protein	IPR005592::IPR029058	Mono-/di-acylglycerol lipase, N-terminal::Alpha/Beta hydrolase fold
G13_73004	LOC111377432	Oleur061Scf0390g07002	AT3G06810.1	acyl-CoA dehydrogenase-related	Q709F0	Acyl-CoA dehydrogenase family member 11	IPR009075::IPR009100::IPR013786	Acyl-CoA dehydrogenase/oxidase C-terminal::Acyl-CoA dehydrogenase/oxidase, N-terminal and middle domain::Acyl-CoA dehydrogenase/oxidase, N-terminal
G13_83120	LOC111377435	Oleur061Scf0390g07032	AT4G16070.1	Mono-/di-acylglycerol lipase, N-terminal;Lipase, class 3		Unknown protein	IPR005592::IPR029058	Mono-/di-acylglycerol lipase, N-terminal::Alpha/Beta hydrolase fold
G13_20917	LOC111366041	Oleur061Scf6266g11021	AT3G05680.2	embryo defective 2016		Unknown protein	IPR026736::IPR031801	Protein virilizer::Virilizer, N-terminal
G13_25159	LOC111366051	Oleur061Scf0888g02005	AT3G06370.1	sodium hydrogen exchanger 4	Q84WG1	Sodium/hydrogen exchanger 3	IPR006153::IPR018422	Cation/H+ exchanger::Cation/H+ exchanger, CPA1 family
G13_39070	LOC111366027	Oleur061Scf1639g00012			Q5N6V0	B3 domain-containing protein Os01g0905400	IPR015300	DNA-binding pseudobarrel domain
G13_61033	LOC111366050	Oleur061Scf1724g06013	AT1G54630.1	acyl carrier protein 3	P93092	Acyl carrier protein 1, chloroplastic	IPR003231::IPR009081	Acyl carrier protein ACP::Phosphopantetheine binding ACP domain
G13_120822	LOC111366027	Oleur061Scf1639g00012			Q5N6V0	B3 domain-containing protein Os01g0905400	IPR015300	DNA-binding pseudobarrel domain
G13_49401	LOC111366051	Oleur061Scf0888g02005	AT3G06370.1	sodium hydrogen exchanger 4	Q84WG1	Sodium/hydrogen exchanger 3	IPR006153::IPR018422	Cation/H+ exchanger::Cation/H+ exchanger, CPA1 family
G13_92177	LOC111366050	Oleur061Scf1724g06013	AT1G54630.1	acyl carrier protein 3	P93092	Acyl carrier protein 1, chloroplastic	IPR003231::IPR009081	Acyl carrier protein ACP::Phosphopantetheine binding ACP domain
G13_54697	LOC111366040	Oleur061Scf6266g11010	AT2G35940.1	BEL1-like homeodomain 1	Q9SJ56	BEL1-like homeodomain protein 1	IPR006563::IPR009057	POX domain::Homeobox domain-like
G13_25467	LOC111366064	Oleur061Scf0073g03013	AT4G29950.1	Ypt/Rab-GAP domain of gyp1p superfamily protein	Q80XQ2	TBC1 domain family member 5	IPR000195	Rab-GTPase-TBC domain
G13_65398	LOC111365786	Oleur061Scf0073g02010	AT2G42940.1	Predicted AT-hook DNA-binding family protein	Q9SJG4	AT-hook motif nuclear-localized protein 16	IPR005175	PPC domain
G13_130305	LOC111365786	Oleur061Scf0073g02010	AT2G42940.1	Predicted AT-hook DNA-binding family protein	Q9SJG4	AT-hook motif nuclear-localized protein 16	IPR005175	PPC domain
G13_72531	LOC111366098	Oleur061Scf0604g03026	AT1G19180.1	jasmonate-zim-domain protein 1	Q9LMA8	Protein TIFY 10A	IPR010399::IPR018467	Tify domain::CO/COL/TOC1, conserved site
G13_61825	LOC111366064	Oleur061Scf0073g03013	AT4G29950.1	Ypt/Rab-GAP domain of gyp1p superfamily protein	Q80XQ2	TBC1 domain family member 5	IPR000195	Rab-GTPase-TBC domain
G13_75747	LOC111366120	Oleur061Scf0604g08026	AT5G56750.1	N-MYC downregulated-like 1	Q9UN36	Protein NDRG2	IPR004142::IPR029058	NDRG::Alpha/Beta hydrolase fold
G13_79590	LOC111366098	Oleur061Scf0604g03026	AT1G19180.1	jasmonate-zim-domain protein 1	Q9LMA8	Protein TIFY 10A	IPR010399::IPR018467	Tify domain::CO/COL/TOC1, conserved site
G13_40300	LOC111377861	Oleur061Scf0186g01024	AT2G24360.1	Protein kinase superfamily protein	Q2MHE4	Serine/threonine-protein kinase HT1	IPR011009	Protein kinase-like domain
G13_43803	LOC111366120	Oleur061Scf0604g08026	AT5G56750.1	N-MYC downregulated-like 1	Q9UN36	Protein NDRG2	IPR004142::IPR029058	NDRG::Alpha/Beta hydrolase fold
G13_83605	LOC111366107	Oleur061Scf0604g05034	AT5G20610.1		F4K5K6	Protein PLASTID MOVEMENT IMPAIRED 1-RELATED 1	IPR018392	LysM domain
G13_121257	LOC111366176	Oleur061Scf1209g03019	AT3G15840.1	post-illumination chlorophyll fluorescence increase		Unknown protein
G13_2858	LOC111366175	Oleur061Scf1209g03020	AT1G15340.1	methyl-CPG-binding domain 10	Q9LW00	Methyl-CpG-binding domain-containing protein 11	IPR016177	DNA-binding domain
G13_8576	LOC111365560	Oleur061Scf7892g00009	AT1G54130.1	RELA/SPOT homolog 3	Q8CS97	GTP pyrophosphokinase	IPR003607::IPR007685	HD/PDEase domain::RelA/SpoT
G13_23775	LOC111366176	Oleur061Scf1209g03019	AT3G15840.1	post-illumination chlorophyll fluorescence increase		Unknown protein
G13_36806	LOC111366175	Oleur061Scf1209g03020	AT1G15340.1	methyl-CPG-binding domain 10	Q9LW00	Methyl-CpG-binding domain-containing protein 11	IPR016177	DNA-binding domain
G13_49864	LOC111366179	Oleur061Scf1382g00010				Unknown protein
G13_49914	LOC111366149	Oleur061Scf1277g03003	AT3G24430.1	ATP binding	P53383	Iron-sulfur cluster carrier protein	IPR002744::IPR010376::IPR019591::IPR027417	Domain of unknown function DUF59::Domain of unknown function DUF971::Mrp/NBP35 ATP-binding protein::P-loop containing nucleoside triphosphate hydrolase
G13_54117	LOC111366179	Oleur061Scf1209g03045				Unknown protein
G13_57862	LOC111365560	Oleur061Scf7892g00009	AT1G54130.1	RELA/SPOT homolog 3	Q8CS97	GTP pyrophosphokinase	IPR003607::IPR007685	HD/PDEase domain::RelA/SpoT
G13_65632	LOC111366130	Oleur061Scf0604g09032	AT1G51980.1	Insulinase (Peptidase family M16) protein	P29677	Mitochondrial-processing peptidase subunit alpha	IPR011249	Metalloenzyme, LuxS/M16 peptidase-like
G13_67491	LOC111366098	Oleur061Scf0604g03026	AT1G19180.1	jasmonate-zim-domain protein 1	Q9LMA8	Protein TIFY 10A	IPR010399::IPR018467	Tify domain::CO/COL/TOC1, conserved site
G13_76989	LOC111366155	Oleur061Scf1277g02003	AT1G72390.1			Unknown protein	IPR021950	Transcription factor Spt20
G13_80116	LOC111366194	Oleur061Scf2960g01049	AT3G16170.1	AMP-dependent synthetase and ligase family protein	Q8H151	Malonate--CoA ligase	IPR000873::IPR025110	AMP-dependent synthetase/ligase::AMP-binding enzyme C-terminal domain
G13_84712	LOC111366100	Oleur061Scf0604g04019	AT5G20720.1	chaperonin 20	O65282	20 kDa chaperonin, chloroplastic	IPR020818	GroES chaperonin family
G13_120541	LOC111366156	Oleur061Scf1277g02018	AT3G14130.1	Aldolase-type TIM barrel family protein	Q9LJH5	Peroxisomal (S)-2-hydroxy-acid oxidase GLO4	IPR012133::IPR013785	Alpha-hydroxy acid dehydrogenase, FMN-dependent::Aldolase-type TIM barrel
G13_149047	LOC111366156	Oleur061Scf1277g02018	AT3G14130.1	Aldolase-type TIM barrel family protein	Q9LJH5	Peroxisomal (S)-2-hydroxy-acid oxidase GLO4	IPR012133::IPR013785	Alpha-hydroxy acid dehydrogenase, FMN-dependent::Aldolase-type TIM barrel
G13_159425	LOC111366131	Oleur061Scf0604g09033	AT4G29230.1	NAC domain containing protein 75	O49459	NAC domain-containing protein 73	IPR003441	NAC domain
G13_181099	LOC111366149	Oleur061Scf1277g03003	AT3G24430.1	ATP binding	P53383	Iron-sulfur cluster carrier protein	IPR002744::IPR010376::IPR019591::IPR027417	Domain of unknown function DUF59::Domain of unknown function DUF971::Mrp/NBP35 ATP-binding protein::P-loop containing nucleoside triphosphate hydrolase
G13_49616	LOC111366130	Oleur061Scf0604g09032	AT1G51980.1	Insulinase (Peptidase family M16) protein	P29677	Mitochondrial-processing peptidase subunit alpha	IPR011249	Metalloenzyme, LuxS/M16 peptidase-like
G13_15063	LOC111369570	Oleur061Scf2476g00004	AT1G72970.1	Glucose-methanol-choline (GMC) oxidoreductase family protein	Q9SSM2	(R)-mandelonitrile lyase-like	IPR012132::IPR023753	Glucose-methanol-choline oxidoreductase::FAD/NADP-binding domain
G13_16060	LOC111366131	Oleur061Scf0604g09033	AT4G29230.1	NAC domain containing protein 75	O49459	NAC domain-containing protein 73	IPR003441	NAC domain
G13_88781	LOC111376019	Oleur061Scf2960g01046	AT3G16490.1	IQ-domain 26	Q8L4D8	Protein IQ-DOMAIN 31	IPR000048::IPR025064	IQ motif, EF-hand binding site::Domain of unknown function DUF4005
G13_173693	LOC111369570	Oleur061Scf2476g00004	AT1G72970.1	Glucose-methanol-choline (GMC) oxidoreductase family protein	Q9SSM2	(R)-mandelonitrile lyase-like	IPR012132::IPR023753	Glucose-methanol-choline oxidoreductase::FAD/NADP-binding domain
G13_16900	LOC111378505	Oleur061Scf6892g01014	AT3G02760.1	Class II aaRS and biotin synthetases superfamily protein	F4IYF8	Histidine--tRNA ligase, cytoplasmic	IPR004516::IPR008948	Histidine-tRNA ligase/ATP phosphoribosyltransferase regulatory subunit::L-Aspartase-like
G13_27823	LOC111369649	Oleur061Scf8342g00012	AT3G02760.1	Class II aaRS and biotin synthetases superfamily protein	P93422	Histidine--tRNA ligase, cytoplasmic	IPR004516::IPR008948	Histidine-tRNA ligase/ATP phosphoribosyltransferase regulatory subunit::L-Aspartase-like
G13_62731	LOC111366201	Oleur061Scf1480g00006	AT5G07400.1	forkhead-associated domain-containing protein / FHA domain-containing protein		Unknown protein	IPR008984::IPR010347::IPR014905::IPR027415	SMAD/FHA domain::Tyrosyl-DNA phosphodiesterase I::HIRAN domain::Tyrosyl-DNA phosphodiesterase C-terminal domain
G13_102680	LOC111366201	Oleur061Scf1480g00006	AT5G07400.1	forkhead-associated domain-containing protein / FHA domain-containing protein		Unknown protein	IPR008984::IPR010347::IPR014905::IPR027415	SMAD/FHA domain::Tyrosyl-DNA phosphodiesterase I::HIRAN domain::Tyrosyl-DNA phosphodiesterase C-terminal domain
G13_144515	LOC111369649	Oleur061Scf8342g00012	AT3G02760.1	Class II aaRS and biotin synthetases superfamily protein	P93422	Histidine--tRNA ligase, cytoplasmic	IPR004516::IPR008948	Histidine-tRNA ligase/ATP phosphoribosyltransferase regulatory subunit::L-Aspartase-like
G13_176833	LOC111366119	Oleur061Scf0604g08014	AT2G19590.1	ACC oxidase 1	Q9ZUN4	1-aminocyclopropane-1-carboxylate oxidase 1	IPR005123::IPR026992::IPR027443	Oxoglutarate/iron-dependent dioxygenase::Non-haem dioxygenase N-terminal domain::Isopenicillin N synthase-like
G13_12532	LOC111369550	Oleur061Scf0770g03011	AT1G17665.1			Unknown protein
G13_33144	LOC111383466	Oleur061Scf9079g01002	AT4G25150.1	HAD superfamily, subfamily IIIB acid phosphatase	P10743	Stem 31 kDa glycoprotein	IPR005519::IPR023214	Acid phosphatase, class B-like::HAD-like domain
G13_116650	LOC111379817	Oleur061Scf7200g00009	AT5G48930.1	hydroxycinnamoyl-CoA shikimate/quinate hydroxycinnamoyl transferase	Q8GSM7	Shikimate O-hydroxycinnamoyltransferase	IPR003480	Transferase
G13_99548	LOC111365232	Oleur061Scf3519g02025	AT5G59010.1	Protein kinase protein with tetratricopeptide repeat domain	Q06548	Protein kinase APK1A, chloroplastic	IPR011009::IPR011990::IPR013320	Protein kinase-like domain::Tetratricopeptide-like helical domain::Concanavalin A-like lectin/glucanase domain
G13_117522	LOC111365232	Oleur061Scf3519g02025	AT5G59010.1	Protein kinase protein with tetratricopeptide repeat domain	Q06548	Protein kinase APK1A, chloroplastic	IPR011009::IPR011990::IPR013320	Protein kinase-like domain::Tetratricopeptide-like helical domain::Concanavalin A-like lectin/glucanase domain
G14_93064	LOC111370923	Oleur061Scf2968g03009	AT5G46290.3	3-ketoacyl-acyl carrier protein synthase I	Q9KQH9	3-oxoacyl-[acyl-carrier-protein] synthase 2	IPR017568::IPR020841	3-oxoacyl-[acyl-carrier-protein] synthase 2::Polyketide synthase, beta-ketoacyl synthase domain
G14_134192	LOC111370903	Oleur061Scf2968g04005	AT2G34410.1	O-acetyltransferase family protein	Q8L7C8	Protein REDUCED WALL ACETYLATION 1	IPR012419	Cas1p 10 TM acyl transferase domain
G14_110957	LOC111370923	Oleur061Scf2968g03009	AT5G46290.3	3-ketoacyl-acyl carrier protein synthase I	Q9KQH9	3-oxoacyl-[acyl-carrier-protein] synthase 2	IPR017568::IPR020841	3-oxoacyl-[acyl-carrier-protein] synthase 2::Polyketide synthase, beta-ketoacyl synthase domain
G14_76518	LOC111370477	Oleur061Scf2025g00023	AT3G60130.1	beta glucosidase 16	P26205	Cyanogenic beta-glucosidase	IPR001360::IPR017853::IPR033132	Glycoside hydrolase family 1::Glycoside hydrolase superfamily::Glycosyl hydrolases family 1, N-terminal conserved site
G14_106403	LOC111370477	Oleur061Scf2025g00023	AT3G60130.1	beta glucosidase 16	P26205	Cyanogenic beta-glucosidase	IPR001360::IPR017853::IPR033132	Glycoside hydrolase family 1::Glycoside hydrolase superfamily::Glycosyl hydrolases family 1, N-terminal conserved site
G14_153020	LOC111370273	Oleur061Scf1680g10022	AT2G34820.1	basic helix-loop-helix (bHLH) DNA-binding superfamily protein	Q84RD0	Transcription factor bHLH53	IPR011598	Myc-type, basic helix-loop-helix bHLH domain
G14_47551	LOC111370444	Oleur061Scf2934g02013			Q31809	Ribulose bisphosphate carboxylase large chain	IPR017443	Ribulose bisphosphate carboxylase, large subunit, ferrodoxin-like N-terminal
G14_91742	LOC111370444	Oleur061Scf2934g02013			Q31809	Ribulose bisphosphate carboxylase large chain	IPR017443	Ribulose bisphosphate carboxylase, large subunit, ferrodoxin-like N-terminal
G14_17559	LOC111370420	Oleur061Scf0194g06013	AT5G45030.1	Trypsin family protein		Unknown protein	IPR009003	Peptidase S1, PA clan
G14_74596	LOC111370420	Oleur061Scf3363g00005	AT5G45030.1	Trypsin family protein		Unknown protein	IPR009003	Peptidase S1, PA clan
G14_91902	LOC111370431	Oleur061Scf0830g17014	AT5G44800.1	chromatin remodeling 4	Q6PDQ2	Chromodomain-helicase-DNA-binding protein 4	IPR000330::IPR001650::IPR009057::IPR009463::IPR016197::IPR027417	SNF2-related, N-terminal domain::Helicase, C-terminal::Homeobox domain-like::Domain of unknown function DUF1087::Chromo domain-like::P-loop containing nucleoside triphosphate hydrolase
G14_149138	LOC111370420	Oleur061Scf3363g00005	AT5G45030.1	Trypsin family protein		Unknown protein	IPR009003	Peptidase S1, PA clan
G14_23973	LOC111370431	Oleur061Scf0830g17014	AT5G44800.1	chromatin remodeling 4	Q6PDQ2	Chromodomain-helicase-DNA-binding protein 4	IPR000330::IPR001650::IPR009057::IPR009463::IPR016197::IPR027417	SNF2-related, N-terminal domain::Helicase, C-terminal::Homeobox domain-like::Domain of unknown function DUF1087::Chromo domain-like::P-loop containing nucleoside triphosphate hydrolase
G14_82592	LOC111370431	Oleur061Scf0830g17014	AT5G44800.1	chromatin remodeling 4	Q6PDQ2	Chromodomain-helicase-DNA-binding protein 4	IPR000330::IPR001650::IPR009057::IPR009463::IPR016197::IPR027417	SNF2-related, N-terminal domain::Helicase, C-terminal::Homeobox domain-like::Domain of unknown function DUF1087::Chromo domain-like::P-loop containing nucleoside triphosphate hydrolase
G14_141242	LOC111370431	Oleur061Scf2851g01024	AT5G44800.1	chromatin remodeling 4	Q6PDQ2	Chromodomain-helicase-DNA-binding protein 4	IPR009057::IPR009463::IPR027417	Homeobox domain-like::Domain of unknown function DUF1087::P-loop containing nucleoside triphosphate hydrolase
G14_126178	LOC111370443	Oleur061Scf4099g00012	AT4G19610.1	nucleotide binding;nucleic acid binding;RNA binding	Q06106	Multiple RNA-binding domain-containing protein 1	IPR000504	RNA recognition motif domain
G14_57344	LOC111384307	Oleur061Scf1925g00026	AT3G22100.1	basic helix-loop-helix (bHLH) DNA-binding superfamily protein	Q9LRJ4	Transcription factor bHLH117	IPR011598	Myc-type, basic helix-loop-helix bHLH domain
G14_49405	LOC111370355	Oleur061Scf1412g06010	AT3G07640.1			Unknown protein
G14_56378	LOC111409525	Oleur061Scf3858g03004	AT4G37680.1	heptahelical protein 4	Q10PI5	Heptahelical transmembrane protein ADIPOR3	IPR004254	AdipoR/Haemolysin-III-related
G15_110058	LOC111399347	Oleur061Scf1461g00018	AT2G38280.1	AMP deaminase, putative / myoadenylate deaminase, putative	O80452	AMP deaminase	IPR006329::IPR032466	AMP deaminase::Metal-dependent hydrolase
G15_18858	LOC111399325	Oleur061Scf2790g04011			F4J5M9	Clathrin light chain 3	IPR000996	Clathrin light chain
G15_128695	LOC111388979	Oleur061Scf1823g00002	AT2G06255.1	ELF4-like 3	Q8S8F5	Protein ELF4-LIKE 3	IPR009741	Protein EARLY FLOWERING 4
G15_73253	LOC111400962	Oleur061Scf5907g00001	AT1G02150.1	Tetratricopeptide repeat (TPR)-like superfamily protein	Q8LPS6	Pentatricopeptide repeat-containing protein At1g02150	IPR002885::IPR011990	Pentatricopeptide repeat::Tetratricopeptide-like helical domain
G15_129426	LOC111400962	Oleur061Scf5907g00001	AT1G02150.1	Tetratricopeptide repeat (TPR)-like superfamily protein	Q8LPS6	Pentatricopeptide repeat-containing protein At1g02150	IPR002885::IPR011990	Pentatricopeptide repeat::Tetratricopeptide-like helical domain
G15_54275	LOC111399511	Oleur061Scf2336g05010				Unknown protein
G15_192445	LOC111399746	Oleur061Scf2336g04015	AT5G06710.1	homeobox from Arabidopsis thaliana	P46665	Homeobox-leucine zipper protein HAT14	IPR003106::IPR009057	Leucine zipper, homeobox-associated::Homeobox domain-like
G15_118544	LOC111399511	Oleur061Scf2336g05010				Unknown protein
G15_34633	LOC111399746	Oleur061Scf2336g04015	AT5G06710.1	homeobox from Arabidopsis thaliana	P46665	Homeobox-leucine zipper protein HAT14	IPR003106::IPR009057	Leucine zipper, homeobox-associated::Homeobox domain-like
G16_126599	LOC111395572	Oleur061Scf0160g05013			Q5LL90	UDP-N-acetylglucosamine 1-carboxyvinyltransferase	IPR013792	RNA 3'-terminal phosphate cyclase/enolpyruvate transferase, alpha/beta
G16_76817	LOC111395544	Oleur061Scf1987g06033	AT1G78620.2	Protein of unknown function DUF92, transmembrane	Q9SYM0	Protein VTE6, chloroplastic	IPR002794	Protein of unknown function DUF92, TMEM19
G16_26770	LOC111395544	Oleur061Scf1987g06033	AT1G78620.2	Protein of unknown function DUF92, transmembrane	Q9SYM0	Protein VTE6, chloroplastic	IPR002794	Protein of unknown function DUF92, TMEM19
G16_82774	LOC111395550	Oleur061Scf1987g05005	AT3G14750.1		Q93V84	Protein FLX-like 1
G16_104782	LOC111395550	Oleur061Scf1987g05005	AT3G14750.1		Q93V84	Protein FLX-like 1
G16_153853	LOC111395555	Oleur061Scf1987g05026	AT1G17160.1	pfkB-like carbohydrate kinase family protein	P36945	Ribokinase	IPR002139::IPR029056	Ribokinase/fructokinase::Ribokinase-like
G16_72473	LOC111395779	Oleur061Scf2607g00005	AT1G17210.1	IAP-like protein 1		Unknown protein	IPR012935	Zinc finger, C3HC-like
G16_131325	LOC111395779	Oleur061Scf2607g00005	AT1G17210.1	IAP-like protein 1		Unknown protein	IPR012935	Zinc finger, C3HC-like
G16_77675	LOC111395525	Oleur061Scf9147g04003	AT3G14690.1	cytochrome P450, family 72, subfamily A, polypeptide 15	H2DH21	Cytochrome P450 CYP72A219	IPR001128	Cytochrome P450
G16_111637	LOC111395525	Oleur061Scf9147g04003	AT3G14690.1	cytochrome P450, family 72, subfamily A, polypeptide 15	H2DH21	Cytochrome P450 CYP72A219	IPR001128	Cytochrome P450
G16_39161	LOC111395520	Oleur061Scf9147g05022	AT2G42920.1	Pentatricopeptide repeat (PPR-like) superfamily protein	Q9SJG6	Pentatricopeptide repeat-containing protein At2g42920, chloroplastic	IPR002885::IPR011990	Pentatricopeptide repeat::Tetratricopeptide-like helical domain
G16_30069	LOC111395538	Oleur061Scf6731g00003	AT5G48310.1			Unknown protein
G16_44421	LOC111395536	Oleur061Scf7894g01006	AT4G12640.1	RNA recognition motif (RRM)-containing protein	Q8LPQ9	Flowering time control protein FPA	IPR012921	Spen paralogue and orthologue SPOC, C-terminal
G16_77419	LOC111395538	Oleur061Scf6731g00003	AT5G48310.1			Unknown protein
G16_3435	LOC111395536	Oleur061Scf6731g00004	AT4G12640.1	RNA recognition motif (RRM)-containing protein	Q8LPQ9	Flowering time control protein FPA	IPR012921	Spen paralogue and orthologue SPOC, C-terminal
G16_51400	LOC111395454	Oleur061Scf6637g07025	AT5G44150.1			Unknown protein
G16_68188	LOC111395445	Oleur061Scf6637g06018			Q41060	Seed biotin-containing protein SBP65
G16_118973	LOC111395454	Oleur061Scf6637g07025	AT5G44150.1			Unknown protein
G16_93559	LOC111395514	Oleur061Scf6637g02023	AT2G42710.1	Ribosomal protein L1p/L10e family	Q89J70	50S ribosomal protein L1	IPR016095::IPR023674::IPR028364	Ribosomal protein L1, 3-layer alpha/beta-sandwich::Ribosomal protein L1-like::Ribosomal protein L1/ribosomal biogenesis protein
G16_161967	LOC111395445	Oleur061Scf6637g06018			Q41060	Seed biotin-containing protein SBP65
G16_68110	LOC111395489	Oleur061Scf0719g06013	AT1G05020.1	ENTH/ANTH/VHS superfamily protein	Q9ZVN6	Clathrin coat assembly protein AP180	IPR008942::IPR011417	ENTH/VHS::AP180 N-terminal homology ANTH domain
G16_98356	LOC111395491	Oleur061Scf0719g06024	AT2G32950.1	Transducin/WD40 repeat-like superfamily protein	P43254	E3 ubiquitin-protein ligase COP1	IPR013083::IPR015943	Zinc finger, RING/FYVE/PHD-type::WD40/YVTN repeat-like-containing domain
G16_177333	LOC111395382	Oleur061Scf5009g01053	AT4G21440.1	MYB-like 102	Q8GWP0	Transcription factor MYB39	IPR009057	Homeobox domain-like
G17_89975	LOC111412050	Oleur061Scf0527g01016	AT4G26640.2	WRKY family transcription factor family protein	Q6VWJ6	WRKY transcription factor SUSIBA2	IPR003657	WRKY domain
G17_129697	LOC111412439	Oleur061Scf7649g00035	AT2G32940.1	Argonaute family protein	Q6YSJ5	Protein argonaute 16	IPR003100::IPR012337::IPR014811::IPR032472	PAZ domain::Ribonuclease H-like domain::Argonaute, linker 1 domain::Argonaute linker 2 domain
G17_63178	LOC111412041	Oleur061Scf8053g00005	AT1G03650.1	Acyl-CoA N-acyltransferases (NAT) superfamily protein		Unknown protein	IPR016181	Acyl-CoA N-acyltransferase
G17_150685	LOC111412041	Oleur061Scf8053g00005	AT1G03650.1	Acyl-CoA N-acyltransferases (NAT) superfamily protein		Unknown protein	IPR016181	Acyl-CoA N-acyltransferase
G17_56423	LOC111389825	Oleur061Scf2759g01030	AT2G34920.1	RING/U-box superfamily protein		Unknown protein	IPR013083	Zinc finger, RING/FYVE/PHD-type
G17_94844	LOC111389828	Oleur061Scf2759g01037	AT5G44670.1	Domain of unknown function (DUF23)	Q9LTZ9	Galactan beta-1,4-galactosyltransferase GALS2	IPR008166	Glycosyltransferase family 92
G17_143335	LOC111389825	Oleur061Scf2759g01030	AT2G34920.1	RING/U-box superfamily protein		Unknown protein	IPR013083	Zinc finger, RING/FYVE/PHD-type
G17_116333	LOC111389830	Oleur061Scf3161g06023	AT4G20260.4	plasma-membrane associated cation-binding protein 1	Q96262	Plasma membrane-associated cation-binding protein 1	IPR008469	DREPP family
G17_141524	LOC111392458	Oleur061Scf8830g00027	AT1G30800.1	Fasciclin-like arabinogalactan family protein	P0DH64	FAS1 domain-containing protein SELMODRAFT_448915	IPR000782	FAS1 domain
G17_37417	LOC111392433	Oleur061Scf1362g01021	AT5G60710.1	Zinc finger (C3HC4-type RING finger) family protein		Unknown protein	IPR002035::IPR013083::IPR032838	von Willebrand factor, type A::Zinc finger, RING/FYVE/PHD-type::VWA-Hint protein, Vwaint domain
G17_75964	LOC111392455	Oleur061Scf1362g02012	AT4G20380.8	LSD1 zinc finger family protein	P94077	Protein LSD1	IPR005735	Zinc finger, LSD1-type
G17_28588	LOC111383314	Oleur061Scf1587g02015	AT4G05460.1	RNI-like superfamily protein	Q9M0U9	F-box protein SKIP19	IPR001810::IPR032675	F-box domain::Leucine-rich repeat domain, L domain-like
G17_99883	LOC111412255	Oleur061Scf1373g04003	AT4G05460.1	RNI-like superfamily protein	Q9M0U9	F-box protein SKIP19	IPR001810::IPR006553::IPR032675	F-box domain::Leucine-rich repeat, cysteine-containing subtype::Leucine-rich repeat domain, L domain-like
G17_129209	LOC111412255	Oleur061Scf1373g04003	AT4G05460.1	RNI-like superfamily protein	Q9M0U9	F-box protein SKIP19	IPR001810::IPR006553::IPR032675	F-box domain::Leucine-rich repeat, cysteine-containing subtype::Leucine-rich repeat domain, L domain-like
G17_10500	LOC111378702
G17_54576	LOC111378706	Oleur061Scf4920g00007	AT2G28930.1	protein kinase 1B	P46573	Protein kinase APK1B, chloroplastic	IPR011009	Protein kinase-like domain
G17_118709	LOC111412215	Oleur061Scf1271g03017	AT2G34410.1	O-acetyltransferase family protein	Q8L7C8	Protein REDUCED WALL ACETYLATION 1	IPR012419	Cas1p 10 TM acyl transferase domain
G17_86357	LOC111412207	Oleur061Scf1271g04033	AT5G46400.1	Tetratricopeptide repeat (TPR)-like superfamily protein	Q7KRW8	Pre-mRNA-processing factor 39	IPR011990	Tetratricopeptide-like helical domain
G17_140485	LOC111412207	Oleur061Scf1271g04033	AT5G46400.1	Tetratricopeptide repeat (TPR)-like superfamily protein	Q7KRW8	Pre-mRNA-processing factor 39	IPR011990	Tetratricopeptide-like helical domain
G17_138991	LOC111412207	Oleur061Scf1271g04033	AT5G46400.1	Tetratricopeptide repeat (TPR)-like superfamily protein	Q7KRW8	Pre-mRNA-processing factor 39	IPR011990	Tetratricopeptide-like helical domain
G18_14664	LOC111389245	Oleur061Scf2342g02014	AT1G78700.1	BES1/BZR1 homolog 4	Q9ZV88	BES1/BZR1 homolog protein 4	IPR008540::IPR033264	BES1/BZR1 plant transcription factor, N-terminal::BZR family
G18_21312	LOC111394750	Oleur061Scf0128g01020	AT1G52920.1	G protein coupled receptor	F4IEM5	LanC-like protein GCR2	IPR007822	Lanthionine synthetase C-like
G18_32266	LOC111394968	Oleur061Scf4395g00028	AT1G53130.1	Stigma-specific Stig1 family protein	Q9SZ28	Stigma-specific STIG1-like protein 1	IPR006969	Stigma-specific protein Stig1
G18_36939	LOC111378525	Oleur061Scf6308g02001				Unknown protein
G18_40577	LOC111389245	Oleur061Scf2342g02014	AT1G78700.1	BES1/BZR1 homolog 4	Q9ZV88	BES1/BZR1 homolog protein 4	IPR008540::IPR033264	BES1/BZR1 plant transcription factor, N-terminal::BZR family
G18_64748	LOC111382988	Oleur061Scf5076g00043	AT3G15020.1	Lactate/malate dehydrogenase family protein	P17783	Malate dehydrogenase, mitochondrial	IPR001557	L-lactate/malate dehydrogenase
G18_105333	LOC111394727	Oleur061Scf2342g05021	AT5G54010.1	UDP-Glycosyltransferase superfamily protein	Q9FN26	UDP-glycosyltransferase 79B6	IPR002213	UDP-glucuronosyl/UDP-glucosyltransferase
G18_132706	LOC111394727	Oleur061Scf2342g05021	AT5G54010.1	UDP-Glycosyltransferase superfamily protein	Q9FN26	UDP-glycosyltransferase 79B6	IPR002213	UDP-glucuronosyl/UDP-glucosyltransferase
G18_160518	LOC111382988	Oleur061Scf5076g00043	AT3G15020.1	Lactate/malate dehydrogenase family protein	P17783	Malate dehydrogenase, mitochondrial	IPR001557	L-lactate/malate dehydrogenase
G18_42405	LOC111389332	Oleur061Scf3828g00005	AT4G04910.1	AAA-type ATPase family protein	Q9M0Y8	Vesicle-fusing ATPase	IPR003959::IPR009010::IPR027417::IPR029067	ATPase, AAA-type, core::Aspartate decarboxylase-like domain::P-loop containing nucleoside triphosphate hydrolase::CDC48 domain 2-like
G18_127909	LOC111394968	Oleur061Scf4395g00028	AT1G53130.1	Stigma-specific Stig1 family protein	Q9SZ28	Stigma-specific STIG1-like protein 1	IPR006969	Stigma-specific protein Stig1
G18_14686	LOC111394754	Oleur061Scf0037g07004	AT3G13682.1	LSD1-like2	Q8VXV7	Lysine-specific histone demethylase 1 homolog 1	IPR002937::IPR009057::IPR011991::IPR023753	Amine oxidase::Homeobox domain-like::Winged helix-turn-helix DNA-binding domain::FAD/NADP-binding domain
G18_21307	LOC111403941	Oleur061Scf8153g01030	AT5G48150.1	GRAS family transcription factor	Q69VG1	Chitin-inducible gibberellin-responsive protein 1	IPR005202	Transcription factor GRAS
G18_68197	LOC111403941	Oleur061Scf0037g02002	AT5G48150.1	GRAS family transcription factor	Q69VG1	Chitin-inducible gibberellin-responsive protein 1	IPR005202	Transcription factor GRAS
G18_157684	LOC111403941	Oleur061Scf8153g01030	AT5G48150.1	GRAS family transcription factor	Q69VG1	Chitin-inducible gibberellin-responsive protein 1	IPR005202	Transcription factor GRAS
G18_89861	LOC111403965	Oleur061Scf1598g06022	AT5G54920.2			Unknown protein	IPR025852	Ataxin 2, SM domain
G18_57017	LOC111403957	Oleur061Scf1519g00018	AT1G50840.1	polymerase gamma 2	Q6Z4T5	DNA polymerase I A, chloroplastic	IPR002298	DNA polymerase A
G18_86870	LOC111368795	Oleur061Scf0637g01001	AT4G26850.1	mannose-1-phosphate guanylyltransferase (GDP)s;GDP-galactose:mannose-1-phosphate guanylyltransferases;GDP-galactose:glucose-1-phosphate guanylyltransferases;GDP-galactose:myoinositol-1-phosphate guanylyltransferases;glucose-1-phosphate guanylyltransferase	Q3TLS3	GDP-D-glucose phosphorylase 1	IPR026506	GDP-L-galactose/GDP-D-glucose phosphorylase
G18_127800	LOC111403957	Oleur061Scf1519g00018	AT1G50840.1	polymerase gamma 2	Q6Z4T5	DNA polymerase I A, chloroplastic	IPR002298	DNA polymerase A
G18_49453	LOC111376502	Oleur061Scf7207g00023	AT4G26850.1	mannose-1-phosphate guanylyltransferase (GDP)s;GDP-galactose:mannose-1-phosphate guanylyltransferases;GDP-galactose:glucose-1-phosphate guanylyltransferases;GDP-galactose:myoinositol-1-phosphate guanylyltransferases;glucose-1-phosphate guanylyltransferase	Q3TLS3	GDP-D-glucose phosphorylase 1	IPR026506	GDP-L-galactose/GDP-D-glucose phosphorylase
G18_120050	LOC111404658	Oleur061Scf7595g00004	AT5G63020.1	Disease resistance protein (CC-NBS-LRR class) family	Q8L3R3	Disease resistance protein RFL1	IPR001611::IPR002182::IPR003591::IPR027417::IPR032675	Leucine-rich repeat::NB-ARC::Leucine-rich repeat, typical subtype::P-loop containing nucleoside triphosphate hydrolase::Leucine-rich repeat domain, L domain-like
G18_3728	LOC111386703	Oleur061Scf4405g00004	AT4G26760.1	microtubule-associated protein 65-2	Q9FLP0	65-kDa microtubule-associated protein 1	IPR007145	Microtubule-associated protein, MAP65/Ase1/PRC1
G18_89610	LOC111386703	Oleur061Scf4405g00004	AT4G26760.1	microtubule-associated protein 65-2	Q9FLP0	65-kDa microtubule-associated protein 1	IPR007145	Microtubule-associated protein, MAP65/Ase1/PRC1
G18_2787	LOC111407143	Oleur061Scf3315g04035	AT1G11060.1	WAPL (Wings apart-like protein regulation of heterochromatin) protein	Q65Z40	Wings apart-like protein homolog	IPR011989::IPR012502::IPR022771	Armadillo-like helical::WAPL domain::Wings apart-like protein
G18_20713	LOC111376495	Oleur061Scf1775g11018	AT1G50640.1	ethylene responsive element binding factor 3	Q9SXS8	Ethylene-responsive transcription factor 3	IPR016177	DNA-binding domain
G18_36266	LOC111378615	Oleur061Scf1775g04017	AT5G56140.1	RNA-binding KH domain-containing protein	Q9FKT4	KH domain-containing protein At5g56140	IPR004087::IPR032377	K Homology domain::STAR protein, homodimerisation region
G18_39713	LOC111407112	Oleur061Scf1775g00008	AT1G16560.1	Per1-like family protein	Q0VFE3	Post-GPI attachment to proteins factor 3	IPR007217	Per1-like
G18_75656	LOC111407104	Oleur061Scf3315g06033	AT1G79150.1	binding	Q6DRN3	Nucleolar complex protein 3 homolog	IPR005612::IPR011501	CCAAT-binding factor::Nucleolar complex-associated protein 3, N-terminal
G18_76843	LOC111407138	Oleur061Scf1775g03049				Unknown protein
G18_93659	LOC111407157	Oleur061Scf3315g03023	AT3G62980.1	F-box/RNI-like superfamily protein	Q570C0	Protein TRANSPORT INHIBITOR RESPONSE 1	IPR001810::IPR006553::IPR032675	F-box domain::Leucine-rich repeat, cysteine-containing subtype::Leucine-rich repeat domain, L domain-like
G18_97098	LOC111407157	Oleur061Scf3315g03023	AT3G62980.1	F-box/RNI-like superfamily protein	Q570C0	Protein TRANSPORT INHIBITOR RESPONSE 1	IPR001810::IPR006553::IPR032675	F-box domain::Leucine-rich repeat, cysteine-containing subtype::Leucine-rich repeat domain, L domain-like
G18_124813	LOC111407143	Oleur061Scf3315g04035	AT1G11060.1	WAPL (Wings apart-like protein regulation of heterochromatin) protein	Q65Z40	Wings apart-like protein homolog	IPR011989::IPR012502::IPR022771	Armadillo-like helical::WAPL domain::Wings apart-like protein
G18_125278	LOC111407132	Oleur061Scf1775g03041	AT5G56290.1	peroxin 5	Q5ZMQ9	Peroxisomal targeting signal 1 receptor	IPR024111	Peroxisomal targeting signal 1 receptor family
G18_125665	LOC111407132	Oleur061Scf1775g03041	AT5G56290.1	peroxin 5	Q5ZMQ9	Peroxisomal targeting signal 1 receptor	IPR024111	Peroxisomal targeting signal 1 receptor family
G18_152512	LOC111388465	Oleur061Scf3315g05018	AT5G60200.1	TARGET OF MONOPTEROS 6	O24463	Dof zinc finger protein PBF	IPR003851	Zinc finger, Dof-type
G18_59457	LOC111381566	Oleur061Scf3315g02019	AT4G03270.1	Cyclin D6;1	Q69S43	Cyclin-D6-1	IPR013763	Cyclin-like
G18_5219	LOC111407186	Oleur061Scf9139g02002	AT4G02990.1	Mitochondrial transcription termination factor family protein	Q9ZT96	Transcription termination factor MTERF4, chloroplastic	IPR003690	Transcription termination factor, mitochondrial/chloroplastic
G18_20864	LOC111392904	Oleur061Scf0169g07006	AT5G44310.2	Late embryogenesis abundant protein (LEA) family protein	P23283	Desiccation-related protein PCC3-06
G18_25659	LOC111389355	Oleur061Scf9139g11015	AT1G11930.1	Predicted pyridoxal phosphate-dependent enzyme, YBL036C type	Q3T0G5	Proline synthase co-transcribed bacterial homolog protein	IPR011078::IPR029066	COG0325 protein family::PLP-binding barrel
G18_28190	LOC111389383	Oleur061Scf9139g12018	AT4G04640.1	ATPase, F1 complex, gamma subunit protein	P29790	ATP synthase gamma chain, chloroplastic	IPR000131	ATP synthase, F1 complex, gamma subunit
G18_80463	LOC111407176	Oleur061Scf9139g10024	AT1G12000.1	Phosphofructokinase family protein	Q9EZ02	Pyrophosphate--fructose 6-phosphate 1-phosphotransferase	IPR000023::IPR022953	Phosphofructokinase domain::ATP-dependent 6-phosphofructokinase
G18_91934	LOC111389383	Oleur061Scf9139g12018	AT4G04640.1	ATPase, F1 complex, gamma subunit protein	P29790	ATP synthase gamma chain, chloroplastic	IPR000131	ATP synthase, F1 complex, gamma subunit
G18_93431	LOC111407165	Oleur061Scf9139g08034				Unknown protein
G18_103826	LOC111389355	Oleur061Scf9139g11015	AT1G11930.1	Predicted pyridoxal phosphate-dependent enzyme, YBL036C type	Q3T0G5	Proline synthase co-transcribed bacterial homolog protein	IPR011078::IPR029066	COG0325 protein family::PLP-binding barrel
G18_139620	LOC111407176	Oleur061Scf9139g10024	AT1G12000.1	Phosphofructokinase family protein	Q9EZ02	Pyrophosphate--fructose 6-phosphate 1-phosphotransferase	IPR000023::IPR022953	Phosphofructokinase domain::ATP-dependent 6-phosphofructokinase
G18_2974	LOC111407194	Oleur061Scf9139g02010	AT2G01060.1	myb-like HTH transcriptional regulator family protein	Q10LZ1	Protein PHOSPHATE STARVATION RESPONSE 1	IPR009057::IPR025756	Homeobox domain-like::MYB-CC type transcription factor, LHEQLE-containing domain
G18_49535	LOC111392900	Oleur061Scf0169g06006	AT4G17750.1	heat shock factor 1	Q6VBB2	Heat stress transcription factor A-2b	IPR011991::IPR027725	Winged helix-turn-helix DNA-binding domain::Heat shock transcription factor family
G18_151983	LOC111392904	Oleur061Scf0169g07006	AT5G44310.2	Late embryogenesis abundant protein (LEA) family protein	P23283	Desiccation-related protein PCC3-06
G18_68108	LOC111407247	Oleur061Scf1582g03015	AT5G46020.1			Unknown protein
G18_6228	LOC111368671	Oleur061Scf2586g07024	AT1G29220.2	transcriptional regulator family protein	Q9UHR5	SAP30-binding protein	IPR012479	SAP30-binding protein
G18_110867	LOC111407217	Oleur061Scf2586g06006	AT1G29340.1	plant U-box 17	Q9C7R6	U-box domain-containing protein 17	IPR013083::IPR016024	Zinc finger, RING/FYVE/PHD-type::Armadillo-type fold
G18_8551	LOC111407217	Oleur061Scf2586g06006	AT1G29340.1	plant U-box 17	Q9C7R6	U-box domain-containing protein 17	IPR013083::IPR016024	Zinc finger, RING/FYVE/PHD-type::Armadillo-type fold
G18_13211	LOC111407261	Oleur061Scf0020g02023	AT5G46170.1	F-box family protein	Q9FNK5	F-box protein At5g46170	IPR001810	F-box domain
G18_58290	LOC111407261	Oleur061Scf0020g02023	AT5G46170.1	F-box family protein	Q9FNK5	F-box protein At5g46170	IPR001810	F-box domain
G18_106143	LOC111407261	Oleur061Scf0020g02023	AT5G46170.1	F-box family protein	Q9FNK5	F-box protein At5g46170	IPR001810	F-box domain
G18_73580	LOC111396965	Oleur061Scf3434g01024	AT1G30580.1	GTP binding	Q6Z1J6	Obg-like ATPase 1	IPR004396::IPR012675::IPR023192::IPR027417	Ribosome-binding ATPase YchF/Obg-like ATPase 1::Beta-grasp domain::TGS-like domain::P-loop containing nucleoside triphosphate hydrolase
G18_12383	LOC111408324	Oleur061Scf3434g05020	AT5G11720.1	Glycosyl hydrolases family 31 protein	O04893	Alpha-glucosidase	IPR000322::IPR011013::IPR013785::IPR030458::IPR030459::IPR031727	Glycoside hydrolase family 31::Galactose mutarotase-like domain::Aldolase-type TIM barrel::Glycosyl hydrolases family 31, active site::Glycosyl hydrolases family 31, conserved site::Galactose mutarotase, N-terminal barrel
G18_35779	LOC111396967	Oleur061Scf3434g01016				Unknown protein
G18_41017	LOC111407310	Oleur061Scf8350g00016	AT5G36110.1	cytochrome P450, family 716, subfamily A, polypeptide 1	I7C6E8	Beta-amyrin 28-oxidase	IPR001128	Cytochrome P450
G18_57144	LOC111396967	Oleur061Scf3434g01016				Unknown protein
G19_109404	LOC111406740	Oleur061Scf1923g00002	AT2G44540.1	glycosyl hydrolase 9B9	O64889	Endoglucanase 12	IPR001701::IPR008928	Glycoside hydrolase family 9::Six-hairpin glycosidase-like
G19_24117	LOC111406000	Oleur061Scf5759g00021	AT4G12750.1	Homeodomain-like transcriptional regulator	F4JRF5	Homeobox-DDT domain protein RLT3	IPR028941	WHIM2 domain
G19_81300	LOC111405999	Oleur061Scf8945g00008	AT5G18480.1	plant glycogenin-like starch initiation protein 6	Q8GWB7	Inositol phosphorylceramide glucuronosyltransferase 1	IPR002495::IPR029044	Glycosyl transferase, family 8::Nucleotide-diphospho-sugar transferases
G19_27066	LOC111405952	Oleur061Scf3644g00004	AT3G51670.1	SEC14 cytosolic factor family protein / phosphoglyceride transfer family protein	Q9SCU1	Patellin-6	IPR001251::IPR009038::IPR011074	CRAL-TRIO lipid binding domain::GOLD domain::CRAL/TRIO, N-terminal domain
G19_7487	LOC111405952	Oleur061Scf3644g00004	AT3G51670.1	SEC14 cytosolic factor family protein / phosphoglyceride transfer family protein	Q9SCU1	Patellin-6	IPR001251::IPR009038::IPR011074	CRAL-TRIO lipid binding domain::GOLD domain::CRAL/TRIO, N-terminal domain
G20_114633	LOC111370164	Oleur061Scf1255g07015	AT1G06230.1	global transcription factor group E4	Q9LNC4	Transcription factor GTE4	IPR001487::IPR027353	Bromodomain::NET domain
G20_71225	LOC111370829	Oleur061Scf1255g06016	AT3G14940.1	phosphoenolpyruvate carboxylase 3	P27154	Phosphoenolpyruvate carboxylase	IPR021135::IPR033129	Phosphoenolpyruvate carboxylase::Phosphoenolpyruvate carboxylase, His active site
G20_157524	LOC111370164	Oleur061Scf1255g07015	AT1G06230.1	global transcription factor group E4	Q9LNC4	Transcription factor GTE4	IPR001487::IPR027353	Bromodomain::NET domain
G20_7438	LOC111370872	Oleur061Scf6624g01037	AT1G31660.1		O54825	Bystin	IPR007955	Bystin
G20_36505	LOC111370874	Oleur061Scf6624g01039	AT2G34590.1	Transketolase family protein	Q32RS0	Pyruvate dehydrogenase E1 component subunit beta	IPR005475::IPR009014::IPR029061::IPR033247	Transketolase-like, pyrimidine-binding domain::Transketolase C-terminal/Pyruvate-ferredoxin oxidoreductase domain II::Thiamin diphosphate-binding fold::Transketolase family
G20_64736	LOC111370867	Oleur061Scf9094g00012	AT3G14690.1	cytochrome P450, family 72, subfamily A, polypeptide 15	H2DH21	Cytochrome P450 CYP72A219	IPR001128	Cytochrome P450
G20_87430	LOC111370809	Oleur061Scf1255g09019	AT3G18380.2	sequence-specific DNA binding transcription factors;sequence-specific DNA binding	Q8LHP0	Transcription elongation factor 1 homolog	IPR007808::IPR009057::IPR032001	Transcription elongation factor 1::Homeobox domain-like::SAWADEE domain
G20_47991	LOC111395779	Oleur061Scf6624g00011	AT1G17210.1	IAP-like protein 1		Unknown protein	IPR012935	Zinc finger, C3HC-like
G20_59663	LOC111370872	Oleur061Scf6624g01037	AT1G31660.1		O54825	Bystin	IPR007955	Bystin
G20_69596	LOC111395779	Oleur061Scf6624g00011	AT1G17210.1	IAP-like protein 1		Unknown protein	IPR012935	Zinc finger, C3HC-like
G20_85035	LOC111370867	Oleur061Scf9094g00012	AT3G14690.1	cytochrome P450, family 72, subfamily A, polypeptide 15	H2DH21	Cytochrome P450 CYP72A219	IPR001128	Cytochrome P450
G20_7111	LOC111380392	Oleur061Scf1664g02055	AT5G55100.2	SWAP (Suppressor-of-White-APricot)/surp domain-containing protein	D3ZTQ1	Splicing factor, suppressor of white-apricot homolog	IPR000061::IPR019147	SWAP/Surp::Suppressor of white apricot N-terminal domain
G20_49565	LOC111370803	Oleur061Scf1255g10005	AT3G15220.1	Protein kinase superfamily protein	B0LT89	Serine/threonine-protein kinase 24	IPR011009	Protein kinase-like domain
G20_53366	LOC111370822	Oleur061Scf1255g07007	AT1G53250.1			Unknown protein	IPR003611	Nuclease associated modular domain 3
G20_55895	LOC111380392	Oleur061Scf1664g02055	AT5G55100.2	SWAP (Suppressor-of-White-APricot)/surp domain-containing protein	D3ZTQ1	Splicing factor, suppressor of white-apricot homolog	IPR000061::IPR019147	SWAP/Surp::Suppressor of white apricot N-terminal domain
G20_78416	LOC111369390	Oleur061Scf1716g02002	AT1G78680.1	gamma-glutamyl hydrolase 2	P93164	Gamma-glutamyl hydrolase	IPR011697::IPR029062	Peptidase C26::Class I glutamine amidotransferase-like
G20_151452	LOC111370803	Oleur061Scf1255g10005	AT3G15220.1	Protein kinase superfamily protein	B0LT89	Serine/threonine-protein kinase 24	IPR011009	Protein kinase-like domain
G20_66128	LOC111395672	Oleur061Scf8470g00007	AT2G05710.1	aconitase 3	O04916	Aconitate hydratase, cytoplasmic	IPR015928	Aconitase/3-isopropylmalate dehydratase, swivel
G20_106816	LOC111378760	Oleur061Scf8135g00021				Unknown protein
G20_109001	LOC111395672	Oleur061Scf8470g00007	AT2G05710.1	aconitase 3	O04916	Aconitate hydratase, cytoplasmic	IPR015928	Aconitase/3-isopropylmalate dehydratase, swivel
G20_177515	LOC111383497	Oleur061Scf8135g00005	AT4G27060.1	ARM repeat superfamily protein	Q9T041	Microtubule-associated protein TORTIFOLIA1	IPR016024::IPR033337	Armadillo-type fold::MT-associated protein TORTIFOLIA1/SPIRAL2-like
G20_57494	LOC111379389
G20_77946	LOC111370793	Oleur061Scf3663g07050	AT5G54650.1	formin homology5	Q94B77	Formin-like protein 5	IPR015425	Formin, FH2 domain
G20_81654	LOC111370793	Oleur061Scf2866g02011	AT5G54650.1	formin homology5	Q94B77	Formin-like protein 5	IPR008978::IPR015425	HSP20-like chaperone::Formin, FH2 domain
G20_127770	LOC111379389
G20_6545	LOC111382601	Oleur061Scf9173g04046	AT5G54280.2	myosin 2	F4K0A6	Myosin-2	IPR000048	IQ motif, EF-hand binding site
G20_144800	LOC111370154	Oleur061Scf3663g07060	AT5G54670.1	kinesin 3	P46875	Kinesin-3	IPR001752::IPR027417::IPR031852	Kinesin motor domain::P-loop containing nucleoside triphosphate hydrolase::Spindle pole body-associated protein Vik1/Cik1, microtubule binding domain
G20_51015	LOC111370154	Oleur061Scf3663g07060	AT5G54670.1	kinesin 3	P46875	Kinesin-3	IPR001752::IPR027417::IPR031852	Kinesin motor domain::P-loop containing nucleoside triphosphate hydrolase::Spindle pole body-associated protein Vik1/Cik1, microtubule binding domain
G20_48659	LOC111370986	Oleur061Scf9090g00010	AT2G38020.1	vacuoleless1 (VCL1)	Q55C58	Vacuolar protein sorting-associated protein 16 homolog	IPR011042::IPR016534::IPR017986	Six-bladed beta-propeller, TolB-like::Vacuolar protein sorting-associated protein 16::WD40-repeat-containing domain
G20_64933	LOC111370986	Oleur061Scf9090g00010	AT2G38020.1	vacuoleless1 (VCL1)	Q55C58	Vacuolar protein sorting-associated protein 16 homolog	IPR011042::IPR016534::IPR017986	Six-bladed beta-propeller, TolB-like::Vacuolar protein sorting-associated protein 16::WD40-repeat-containing domain
G20_153887	LOC111373978	Oleur061Scf9061g00006	AT1G53050.1	Protein kinase superfamily protein	Q6I5Y0	Cyclin-dependent kinase C-1	IPR011009	Protein kinase-like domain
G20_28668	LOC111378665	Oleur061Scf7779g02014	AT2G32415.1	Polynucleotidyl transferase, ribonuclease H fold protein with HRDC domain	A9LLI8	Protein RRP6-like 3	IPR012337	Ribonuclease H-like domain
G20_1764	LOC111373978	Oleur061Scf9061g00006	AT1G53050.1	Protein kinase superfamily protein	Q6I5Y0	Cyclin-dependent kinase C-1	IPR011009	Protein kinase-like domain
G20_64413	LOC111370880	Oleur061Scf7779g04030	AT4G27310.1	B-box type zinc finger family protein		Unknown protein	IPR000315	B-box-type zinc finger
G20_11659	LOC111388883	Oleur061Scf2913g00004	AT2G20680.1	Glycosyl hydrolase superfamily protein	Q7Y223	Mannan endo-1,4-beta-mannosidase 2	IPR017853	Glycoside hydrolase superfamily
G20_72371	LOC111378665	Oleur061Scf7779g02014	AT2G32415.1	Polynucleotidyl transferase, ribonuclease H fold protein with HRDC domain	A9LLI8	Protein RRP6-like 3	IPR012337	Ribonuclease H-like domain
G20_89495	LOC111370880	Oleur061Scf7779g04030	AT4G27310.1	B-box type zinc finger family protein		Unknown protein	IPR000315	B-box-type zinc finger
G20_91259	LOC111378668	Oleur061Scf7779g01015	AT4G04450.1	WRKY family transcription factor	Q9XEC3	WRKY transcription factor 42	IPR003657	WRKY domain
G20_128339	LOC111388883	Oleur061Scf2913g00004	AT2G20680.1	Glycosyl hydrolase superfamily protein	Q7Y223	Mannan endo-1,4-beta-mannosidase 2	IPR017853	Glycoside hydrolase superfamily
G21_160478	LOC111389436	Oleur061Scf1216g00032	AT2G17200.1	ubiquitin family protein	Q9SII8	Ubiquitin domain-containing protein DSK2b	IPR009060::IPR015496::IPR029071	UBA-like::Ubiquilin::Ubiquitin-related domain
G21_35116	LOC111389436	Oleur061Scf1216g00032	AT2G17200.1	ubiquitin family protein	Q9SII8	Ubiquitin domain-containing protein DSK2b	IPR009060::IPR015496::IPR029071	UBA-like::Ubiquilin::Ubiquitin-related domain
G21_33846	LOC111389436	Oleur061Scf1216g00032	AT2G17200.1	ubiquitin family protein	Q9SII8	Ubiquitin domain-containing protein DSK2b	IPR009060::IPR015496::IPR029071	UBA-like::Ubiquilin::Ubiquitin-related domain
G21_40021	LOC111377778	Oleur061Scf1028g02028	AT2G46700.1	CDPK-related kinase 3	P53681	CDPK-related protein kinase	IPR011009::IPR011992	Protein kinase-like domain::EF-hand domain pair
G21_164348	LOC111390660	Oleur061Scf3687g00041	AT2G46550.1			Unknown protein
G21_111374	LOC111386303	Oleur061Scf8517g00005			Q93VH6	GRF1-interacting factor 3	IPR007726	SS18 family
G21_70534	LOC111380386	Oleur061Scf2979g00005	AT1G01040.2	dicer-like 1	Q9SP32	Endoribonuclease Dicer homolog 1	IPR000999::IPR001650::IPR003100::IPR005034::IPR014001::IPR014720::IPR027417	Ribonuclease III domain::Helicase, C-terminal::PAZ domain::Dicer dimerisation domain::Helicase superfamily 1/2, ATP-binding domain::Double-stranded RNA-binding domain::P-loop containing nucleoside triphosphate hydrolase
G22_130258	LOC111408888	Oleur061Scf3075g04032	AT1G36160.1	acetyl-CoA carboxylase 1	F4I1L3	Acetyl-CoA carboxylase 2	IPR000089::IPR011761::IPR011764::IPR013537::IPR016185::IPR029045	Biotin/lipoyl attachment::ATP-grasp fold::Biotin carboxylation domain::Acetyl-CoA carboxylase, central domain::Pre-ATP-grasp domain::ClpP/crotonase-like domain
G22_54536	LOC111408889	Oleur061Scf6408g00014	AT1G78010.1	tRNA modification GTPase, putative	Q8YN91	tRNA modification GTPase MnmE	IPR004520::IPR025867::IPR027417	tRNA modification GTPase MnmE::MnmE, helical domain::P-loop containing nucleoside triphosphate hydrolase
G22_85070	LOC111408889	Oleur061Scf6408g00014	AT1G78010.1	tRNA modification GTPase, putative	Q8YN91	tRNA modification GTPase MnmE	IPR004520::IPR025867::IPR027417	tRNA modification GTPase MnmE::MnmE, helical domain::P-loop containing nucleoside triphosphate hydrolase
G22_70206	LOC111382895	Oleur061Scf7124g00005	AT1G21580.1	Zinc finger C-x8-C-x5-C-x3-H type family protein	A9PJQ8	NAD(P)H-quinone oxidoreductase subunit M, chloroplastic	IPR000571::IPR018922	Zinc finger, CCCH-type::NADPH-quinone oxidoreductase subunit M
G22_29097	LOC111397486	Oleur061Scf0820g01040	AT1G21380.1	Target of Myb protein 1	Q9JJ50	Hepatocyte growth factor-regulated tyrosine kinase substrate	IPR008942	ENTH/VHS
G22_197541	LOC111408742	Oleur061Scf2574g01001	AT1G43710.1	Pyridoxal phosphate (PLP)-dependent transferases superfamily protein	P54772	Histidine decarboxylase	IPR002129::IPR015424	Pyridoxal phosphate-dependent decarboxylase::Pyridoxal phosphate-dependent transferase
G22_183885	LOC111408742	Oleur061Scf2574g01001	AT1G43710.1	Pyridoxal phosphate (PLP)-dependent transferases superfamily protein	P54772	Histidine decarboxylase	IPR002129::IPR015424	Pyridoxal phosphate-dependent decarboxylase::Pyridoxal phosphate-dependent transferase
G22_3543	LOC111387584
G22_25475	LOC111387584
G22_106905	LOC111409109	Oleur061Scf7112g01020	AT4G33990.1	Tetratricopeptide repeat (TPR)-like superfamily protein	O81767	Pentatricopeptide repeat-containing protein At4g33990	IPR002885::IPR011990::IPR032867	Pentatricopeptide repeat::Tetratricopeptide-like helical domain::DYW domain
G22_108968	LOC111409109	Oleur061Scf7112g01020	AT4G33990.1	Tetratricopeptide repeat (TPR)-like superfamily protein	O81767	Pentatricopeptide repeat-containing protein At4g33990	IPR002885::IPR011990::IPR032867	Pentatricopeptide repeat::Tetratricopeptide-like helical domain::DYW domain
G22_51281	LOC111409251	Oleur061Scf1118g01009	AT1G72175.1	RING/U-box protein with domain of unknown function (DUF 1232)	F1MK05	E3 ubiquitin-protein ligase RNF170	IPR010652::IPR013083	Protein of unknown function DUF1232::Zinc finger, RING/FYVE/PHD-type
G23_70124	LOC111382308	Oleur061Scf4628g14008	AT1G47670.1	Transmembrane amino acid transporter family protein	Q9SX98	Lysine histidine transporter-like 8	IPR013057	Amino acid transporter, transmembrane domain
G23_23069	LOC111380812	Oleur061Scf4628g12001	AT4G35020.1	RAC-like 3	Q39435	Rac-like GTP-binding protein RHO1	IPR001806::IPR027417	Small GTPase superfamily::P-loop containing nucleoside triphosphate hydrolase
G23_93564	LOC111380641
G23_12236	LOC111380585	Oleur061Scf4628g07016	AT4G34710.1	arginine decarboxylase 2	Q43075	Arginine decarboxylase	IPR000183::IPR029066	Ornithine/DAP/Arg decarboxylase::PLP-binding barrel
G23_1618	LOC111380585	Oleur061Scf4628g07016	AT4G34710.1	arginine decarboxylase 2	Q43075	Arginine decarboxylase	IPR000183::IPR029066	Ornithine/DAP/Arg decarboxylase::PLP-binding barrel
G23_3191	LOC111380702	Oleur061Scf4628g06006	AT4G34640.1	squalene synthase 1	P53800	Squalene synthase	IPR002060	Squalene/phytoene synthase
G23_3654	LOC111391974	Oleur061Scf8348g04010	AT2G21470.2	SUMO-activating enzyme 2	Q9SJT1	SUMO-activating enzyme subunit 2	IPR016040::IPR028077::IPR030661	NADP-binding domain::Ubiquitin/SUMO-activating enzyme ubiquitin-like domain::SUMO-activating enzyme subunit SAE2/Uba2
G23_52382	LOC111380668	Oleur061Scf4230g01036	AT2G21340.1	MATE efflux family protein	Q8W4G3	Protein DETOXIFICATION 46, chloroplastic	IPR002528	Multi antimicrobial extrusion protein
G23_59477	LOC111386243	Oleur061Scf3428g00034	AT2G21240.1	basic pentacysteine 4	Q5VSA8	Barley B recombinant-like protein D	IPR010409	GAGA-binding transcriptional activator
G23_82888	LOC111380668	Oleur061Scf1483g00046	AT2G21340.1	MATE efflux family protein	Q8W4G3	Protein DETOXIFICATION 46, chloroplastic	IPR002528	Multi antimicrobial extrusion protein
G23_94626	LOC111380991	Oleur061Scf5798g01006	AT4G34320.1	Protein of unknown function (DUF677)	Q9SYZ7	UPF0496 protein At4g34320	IPR007749	Protein of unknown function DUF677
G23_15203	LOC111380551	Oleur061Scf6913g01002	AT2G16250.1	Leucine-rich repeat protein kinase family protein	Q6XAT2	LRR receptor-like serine/threonine-protein kinase ERL2	IPR001611::IPR003591::IPR011009::IPR013320::IPR032675	Leucine-rich repeat::Leucine-rich repeat, typical subtype::Protein kinase-like domain::Concanavalin A-like lectin/glucanase domain::Leucine-rich repeat domain, L domain-like
G23_58567	LOC111380991	Oleur061Scf5798g01006	AT4G34320.1	Protein of unknown function (DUF677)	Q9SYZ7	UPF0496 protein At4g34320	IPR007749	Protein of unknown function DUF677
G23_99283	LOC111381519	Oleur061Scf1117g00005				Unknown protein	IPR000782	FAS1 domain
G23_150553	LOC111381519	Oleur061Scf1117g00005				Unknown protein	IPR000782	FAS1 domain
G23_96596	LOC111381372	Oleur061Scf0091g04020	AT4G33945.1	ARM repeat superfamily protein	Q6NXE6	Armadillo repeat-containing protein 6	IPR016024	Armadillo-type fold
G23_10934	LOC111388782	Oleur061Scf2621g01045	AT1G44542.1	Cyclase family protein	Q2N5X0	Kynurenine formamidase	IPR007325	Kynurenine formamidase
G23_39091	LOC111388782	Oleur061Scf0329g01030	AT4G34180.1	Cyclase family protein		Unknown protein	IPR007325	Kynurenine formamidase
G23_93324	LOC111388752	Oleur061Scf2461g00009	AT3G19450.1	GroES-like zinc-binding alcohol dehydrogenase family protein	Q2KNL5	Cinnamyl alcohol dehydrogenase 1	IPR016040::IPR020843	NADP-binding domain::Polyketide synthase, enoylreductase domain
G23_26412	LOC111381234	Oleur061Scf7909g00002	AT3G19220.1	protein disulfide isomerases	Q93YN0	Protein disulfide-isomerase SCO2
G23_30220	LOC111388752	Oleur061Scf2461g00009	AT3G19450.1	GroES-like zinc-binding alcohol dehydrogenase family protein	Q2KNL5	Cinnamyl alcohol dehydrogenase 1	IPR016040::IPR020843	NADP-binding domain::Polyketide synthase, enoylreductase domain
