# Supplementary material for: First note of QTL mapping of low vigor traits using the updated F2 ‘Koroneiki’ linkage map of olive
Source: Front Plant Sci. 2025 Jan 31;16:1519402. doi: 10.3389/fpls.2025.1519402 (PMC11825337; doi:10.3389/fpls.2025.1519402)
Supplement: Supplementary Table S5 — Comparative BLAST Analysis of SNPs in Linkage Group 13 Across Various Published Olive Genomes. [file Table5.xlsx]

## Sheet: All
Supplementary Table 5: Comparative BLAST Analysis of SNPs in Linkage Group 13 Across Various Published Olive Genomes
Linkage Group	Locus	Leccino Genome				Picual Genome				Farga Genome				Sylvestris Genome
		GeneID	% identity	evalue	bit score	GeneID	% identity	evalue	bit score	GeneID	% identity	evalue	bit score	GeneID	% identity	evalue	bit score
G13	2494	GWHGEUUU060014	100	7.7e-20	97.1	Oleur061Scf2054g00012	98.824	2.96e-36	152	OE9A106113	98.077	3.96e-18	91.6	LOC111366004	97.647	6.82e-35	147
G13	2858	GWHGEUUU060473	100	5.91e-26	117	Oleur061Scf1209g03020	100	1.08e-25	117	OE9A118414	100	6.53e-26	117	LOC111366175	100	5.34e-26	117
G13	4747	GWHGEUUU059659	98.824	1.62e-36	152	Oleur061Scf3248g00004	98.824	2.96e-36	152	OE9A052389	98.824	1.79e-36	152	LOC111384596	98.824	1.46e-36	152
G13	4841	GWHGEUUU060014	100	7.7e-20	97.1	Oleur061Scf2054g00012	98.824	2.96e-36	152	OE9A106113	98.077	3.96e-18	91.6	LOC111366004	97.647	6.82e-35	147
G13	8167	GWHGEUUU059936	100	1.26e-32	139	Oleur061Scf4871g00011	100	2.31e-32	139	OE9A092572	100	1.39e-32	139	LOC111365991	100	1.14e-32	139
G13	8576	GWHGEUUU060462	98.438	7.65e-25	113	Oleur061Scf7892g00009	100	3.01e-26	119	OE9A030985	98.438	8.44e-25	113	LOC111365560	98.438	6.91e-25	113
G13	9043	GWHGEUUU059858	97.333	2.73e-29	128	Oleur061Scf2899g02030	97.531	2.31e-32	139	OE9A084686	98.667	6.48e-31	134	LOC111413003	100	1.14e-32	139
G13	10857	GWHGEUUU059853	98.611	2.73e-29	128	Oleur061Scf2899g01004	98.611	4.99e-29	128	OE9A034144	100	6.48e-31	134	LOC111413006	98.611	2.47e-29	128
G13	12532	GWHGEUUU060530	98.551	1.27e-27	122	Oleur061Scf0770g03011	98.551	2.32e-27	122	OE9A111272	97.101	6.53e-26	117	LOC111369550	98.551	1.15e-27	122
G13	12779									OE9A033169	100	1.41e-22	106	LOC111365927	98.246	5.38e-21	100
G13	13274									OE9A024613	98.78	8.32e-35	147
G13	15063	GWHGEUUU060533	98.889	2.69e-39	161	Oleur061Scf2476g00004	98.889	4.92e-39	161	OE9A104190	100	6.39e-41	167	LOC111369570	98.889	2.43e-39	161
G13	15091					Oleur061Scf7210g01037	100	1.06e-40	167	OE9A059907	97.778	1.38e-37	156	LOC111365938	98.889	2.43e-39	161
G13	15198	GWHGEUUU059902	100	5.79e-41	167	Oleur061Scf3524g01017	100	1.06e-40	167	OE9A037090	98.889	2.97e-39	161	LOC111383546	96.667	5.27e-36	150
G13	16060	GWHGEUUU060393	100	1.25e-37	156	Oleur061Scf0604g09033	98.81	1.07e-35	150	OE9A104507	100	1.38e-37	156	LOC111366131	98.81	5.27e-36	150
G13	16900	GWHGEUUU060548	98.889	2.69e-39	161	Oleur061Scf6892g01014	98.889	4.92e-39	161	OE9A081495	98.889	2.97e-39	161	LOC111378505	98.889	2.43e-39	161
G13	20917	GWHGEUUU060182	98.889	2.69e-39	161	Oleur061Scf6266g11021	98.889	4.92e-39	161	OE9A054171	97.778	1.38e-37	156	LOC111366041	100	5.23e-41	167
G13	23398									OE9A033169	100	1.41e-22	106	LOC111365927	98.246	5.38e-21	100
G13	23775	GWHGEUUU060472	98.63	7.59e-30	130	Oleur061Scf1209g03019	100	1.06e-40	167	OE9A040628	98.63	8.38e-30	130	LOC111366176	100	5.23e-41	167
G13	24507	GWHGEUUU060613	100	4.57e-27	121					OE9A107222	100	5.04e-27	121
G13	25159	GWHGEUUU060149	98.701	4.54e-32	137	Oleur061Scf0888g02005	98.701	8.3e-32	137	OE9A037311	97.5	5.01e-32	137	LOC111366051	97.5	4.1e-32	137
G13	25467	GWHGEUUU060248	98.889	2.69e-39	161	Oleur061Scf0073g03013	98.889	4.92e-39	161	OE9A011978	98.889	2.97e-39	161	LOC111366064	98.889	2.43e-39	161
G13	26932					Oleur061Scf1209g04010	100	1.81e-23	110
G13	27823	GWHGEUUU060548	100	5.79e-41	167	Oleur061Scf8342g00012	100	1.06e-40	167	OE9A081495	100	6.39e-41	167	LOC111369649	100	5.23e-41	167
G13	30493	GWHGEUUU060387	98.81	5.83e-36	150					OE9A031221	98.81	6.43e-36	150
G13	32703	GWHGEUUU060022	100	3.53e-28	124	Oleur061Scf7062g05053	100	6.46e-28	124	OE9A107843	100	3.9e-28	124	LOC111365998	100	3.19e-28	124
G13	33144	GWHGEUUU060522	100	5.79e-41	167	Oleur061Scf9079g01002	100	1.06e-40	167	OE9A002043	98.889	2.97e-39	161	LOC111383466	98.684	1.48e-31	135
G13	34190
G13	34828	GWHGEUUU059703	98.889	2.69e-39	161					OE9A052144	98.889	2.97e-39	161	LOC111365916	98.889	2.43e-39	161
G13	36806	GWHGEUUU060473	100	5.91e-26	117	Oleur061Scf1209g03020	100	1.08e-25	117	OE9A118414	100	6.53e-26	117	LOC111366175	100	5.34e-26	117
G13	39070					Oleur061Scf1639g00012	97.531	2.31e-32	139	OE9A090549	97.531	1.39e-32	139	LOC111366027	100	5.27e-36	150
G13	40300	GWHGEUUU060311	97.778	1.25e-37	156	Oleur061Scf0186g01024	97.778	2.29e-37	156	OE9A012916	97.778	1.38e-37	156	LOC111377861	97.778	1.13e-37	156
G13	42465	GWHGEUUU059819	100	5.83e-36	150	Oleur061Scf9056g02015	100	1.07e-35	150	OE9A019214	98.765	2.99e-34	145	LOC111365887	100	5.27e-36	150
G13	43803	GWHGEUUU060377	98.851	1.25e-37	156	Oleur061Scf0604g08026	98.851	2.29e-37	156	OE9A067082	98.851	1.38e-37	156	LOC111366120	98.851	1.13e-37	156
G13	44911	GWHGEUUU059741	100	5.83e-36	150	Oleur061Scf7869g05035	100	1.07e-35	150	OE9A089408	100	6.43e-36	150	LOC111365948	100	5.27e-36	150
G13	45596					Oleur061Scf3524g01022	97.778	2.29e-37	156
G13	46372	GWHGEUUU060022	100	3.53e-28	124	Oleur061Scf7062g05053	100	6.46e-28	124	OE9A107843	100	3.9e-28	124	LOC111365998	100	3.19e-28	124
G13	46373	GWHGEUUU059916	98.113	9.96e-19	93.5	Oleur061Scf0020g05004	98.113	1.82e-18	93.5	OE9A067994	98.113	1.1e-18	93.5	LOC111375422	100	1.94e-20	99
G13	48049	GWHGEUUU060091	100	5.79e-41	167	Oleur061Scf0154g02046	100	1.06e-40	167	OE9A038613	100	6.39e-41	167	LOC111377435	98.889	2.43e-39	161
G13	48955					Oleur061Scf3524g01022	97.778	2.29e-37	156
G13	49140	GWHGEUUU059857	100	5.79e-41	167	Oleur061Scf8180g00012	92.222	4.99e-29	128	OE9A044587	100	6.39e-41	167
G13	49242	GWHGEUUU059674	97.778	1.25e-37	156	Oleur061Scf7210g01007	97.778	2.29e-37	156	OE9A074161	100	6.39e-41	167	LOC111365756	98.889	2.43e-39	161
G13	49401	GWHGEUUU060149	98.701	4.54e-32	137	Oleur061Scf0888g02005	98.701	8.3e-32	137	OE9A037311	98.701	5.01e-32	137	LOC111366051	98.701	4.1e-32	137
G13	49616					Oleur061Scf0604g09032	100	1.06e-40	167	OE9A082413	100	6.39e-41	167	LOC111366130	100	5.23e-41	167
G13	49864	GWHGEUUU060478	97.26	3.53e-28	124	Oleur061Scf1382g00010	95.89	3.01e-26	119	OE9A073898	97.26	3.9e-28	124	LOC111366179	95.89	1.49e-26	119
G13	49914	GWHGEUUU060423	100	5.79e-41	167	Oleur061Scf1277g03003	98.889	4.92e-39	161	OE9A038844	100	6.39e-41	167	LOC111366149	100	5.23e-41	167
G13	50395	GWHGEUUU059822	98.701	4.54e-32	137	Oleur061Scf9056g03049	98.701	8.3e-32	137	OE9A024637	100	1.08e-33	143	LOC111365890	100	8.82e-34	143
G13	51407	GWHGEUUU059747	98.889	2.69e-39	161	Oleur061Scf7869g07014	98.889	4.92e-39	161	OE9A088288	100	6.39e-41	167	LOC111365950	97.778	1.13e-37	156
G13	51638	GWHGEUUU058989	92.647	2.14e-20	99	Oleur061Scf6266g10008	100	1.8e-28	126	OE9A001697	98.529	5.04e-27	121
G13	52413	GWHGEUUU059990	100	5.83e-36	150	Oleur061Scf7192g02004	100	1.07e-35	150	OE9A104488	100	6.43e-36	150
G13	54117	GWHGEUUU060478	98.551	1.27e-27	122	Oleur061Scf1209g03045	97.101	3.89e-25	115	OE9A073898	98.551	1.4e-27	122	LOC111366179	100	2.47e-29	128
G13	54697	GWHGEUUU060183	97.778	1.25e-37	156	Oleur061Scf6266g11010	97.778	2.29e-37	156	OE9A077972	97.778	1.38e-37	156	LOC111366040	97.778	1.13e-37	156
G13	57862	GWHGEUUU060462	94.366	9.89e-24	110	Oleur061Scf7892g00009	95.775	3.89e-25	115	OE9A030985	94.366	1.09e-23	110	LOC111365560	94.366	8.94e-24	110
G13	58511					Oleur061Scf1209g04010	92.424	5.06e-19	95.3
G13	61033	GWHGEUUU060151	98.889	2.69e-39	161	Oleur061Scf1724g06013	98.889	4.92e-39	161	OE9A102649	98.889	2.97e-39	161	LOC111366050	100	5.23e-41	167
G13	61825	GWHGEUUU060248	98.889	2.69e-39	161	Oleur061Scf0073g03013	98.889	4.92e-39	161	OE9A011978	98.889	2.97e-39	161	LOC111366064	98.889	2.43e-39	161
G13	62279	GWHGEUUU059852	100	9.82e-29	126	Oleur061Scf2899g01021	100	1.8e-28	126	OE9A025129	98.529	5.04e-27	121	LOC111413007	100	8.88e-29	126
G13	62731	GWHGEUUU060603	98.63	7.59e-30	130	Oleur061Scf1480g00006	98.63	1.39e-29	130	OE9A067707	100	5.01e-32	137	LOC111366201	98.63	6.86e-30	130
G13	63826	GWHGEUUU060387	98.765	2.71e-34	145					OE9A119167	100	6.43e-36	150
G13	64931	GWHGEUUU059743	100	7.59e-30	130	Oleur061Scf7869g06012	100	1.39e-29	130
G13	65398	GWHGEUUU060257	100	2.71e-34	145	Oleur061Scf0073g02010	100	4.96e-34	145	OE9A066080	100	2.99e-34	145	LOC111365786	100	2.45e-34	145
G13	65632					Oleur061Scf0604g09032	97.778	2.29e-37	156	OE9A082413	97.778	1.38e-37	156	LOC111366130	97.778	1.13e-37	156
G13	67491	GWHGEUUU060335	98.765	2.71e-34	145	Oleur061Scf0604g03026	98.765	4.96e-34	145	OE9A096849	100	2.99e-34	145	LOC111366098	98.765	2.45e-34	145
G13	72094	GWHGEUUU060613	98.462	2.13e-25	115					OE9A107222	98.462	2.35e-25	115
G13	72531	GWHGEUUU060335	98.485	5.91e-26	117	Oleur061Scf0604g03026	98.485	1.08e-25	117	OE9A096849	98.485	6.53e-26	117	LOC111366098	98.485	5.34e-26	117
G13	73004	GWHGEUUU060093	96.364	3.58e-18	91.6	Oleur061Scf0390g07002	100	2.34e-22	106	OE9A082219	100	1.41e-22	106	LOC111377432	100	1.16e-22	106
G13	73617
G13	73859	GWHGEUUU059916	100	2.14e-20	99	Oleur061Scf0020g05004	100	3.91e-20	99	OE9A067994	100	2.36e-20	99	LOC111375422	98.113	9.01e-19	93.5
G13	75747	GWHGEUUU060377	100	2.69e-39	161	Oleur061Scf0604g08026	100	4.92e-39	161	OE9A067082	100	2.97e-39	161	LOC111366120	100	2.43e-39	161
G13	76989	GWHGEUUU060436	98.889	2.69e-39	161	Oleur061Scf1277g02003	100	1.06e-40	167	OE9A075764	98.889	2.97e-39	161	LOC111366155	100	5.23e-41	167
G13	77256	GWHGEUUU059824	97.222	1.27e-27	122	Oleur061Scf9056g03051	97.26	6.46e-28	124	OE9A053809	97.26	3.9e-28	124	LOC111365891	97.26	3.19e-28	124
G13	79590	GWHGEUUU060335	97.647	7.54e-35	147	Oleur061Scf0604g03026	97.647	1.38e-34	147	OE9A096849	97.647	8.32e-35	147	LOC111366098	97.647	6.82e-35	147
G13	80116	GWHGEUUU060503	98.889	2.69e-39	161	Oleur061Scf2960g01049	98.889	4.92e-39	161	OE9A045948	100	6.39e-41	167	LOC111366194	98.889	2.43e-39	161
G13	82452	GWHGEUUU059990	100	5.83e-36	150	Oleur061Scf7192g02004	100	1.07e-35	150	OE9A104488	100	6.43e-36	150
G13	83120	GWHGEUUU060091	98.889	2.69e-39	161	Oleur061Scf0390g07032	100	1.06e-40	167	OE9A038613	98.889	2.97e-39	161	LOC111377435	100	5.23e-41	167
G13	83605	GWHGEUUU060351	98.182	7.7e-20	97.1	Oleur061Scf0604g05034	98.182	1.41e-19	97.1	OE9A028639	98.182	8.5e-20	97.1	LOC111366107	98.182	6.96e-20	97.1
G13	84712	GWHGEUUU060337	100	5.79e-41	167	Oleur061Scf0604g04019	100	1.06e-40	167	OE9A009613	100	6.39e-41	167	LOC111366100	100	5.23e-41	167
G13	86144	GWHGEUUU059743	98.571	3.53e-28	124	Oleur061Scf7869g06012	98.571	6.46e-28	124
G13	88781	GWHGEUUU060511	96	1.27e-27	122	Oleur061Scf2960g01046	96	2.32e-27	122					LOC111376019	96	1.15e-27	122
G13	89668	GWHGEUUU060158	97.015	7.65e-25	113	Oleur061Scf1724g07017	97.015	1.4e-24	113	OE9A121489	100	3.01e-29	128
G13	92177	GWHGEUUU060151	98.889	2.69e-39	161	Oleur061Scf1724g06013	98.889	4.92e-39	161	OE9A102649	98.889	2.97e-39	161	LOC111366050	100	5.23e-41	167
G13	99548	GWHGEUUU060756	100	7.59e-30	130	Oleur061Scf3519g02025	100	1.39e-29	130	OE9A008169	100	8.38e-30	130	LOC111365232	100	6.86e-30	130
G13	100686	GWHGEUUU059659	98.889	2.69e-39	161	Oleur061Scf3248g00004	98.889	4.92e-39	161	OE9A052389	98.889	2.97e-39	161	LOC111384596	98.889	2.43e-39	161
G13	102680	GWHGEUUU060603	98.718	1.26e-32	139	Oleur061Scf1480g00006	98.718	2.31e-32	139	OE9A067707	97.468	1.8e-31	135	LOC111366201	98.718	1.14e-32	139
G13	107680	GWHGEUUU059902	100	5.79e-41	167	Oleur061Scf3524g01017	100	1.06e-40	167	OE9A037090	100	6.39e-41	167	LOC111383546	97.778	1.13e-37	156
G13	108951	GWHGEUUU058989	92.647	2.14e-20	99	Oleur061Scf6266g10008	100	1.8e-28	126	OE9A001697	98.529	5.04e-27	121
G13	110941	GWHGEUUU059915	100	4.51e-37	154	Oleur061Scf4902g00007	100	8.24e-37	154	OE9A078792	100	4.97e-37	154
G13	111539					Oleur061Scf0336g03049	98.889	4.92e-39	161	OE9A059907	100	6.39e-41	167	LOC111365938	98.889	2.43e-39	161
G13	111759	GWHGEUUU060158	97.015	7.65e-25	113	Oleur061Scf1724g07017	97.015	1.4e-24	113	OE9A121489	100	3.01e-29	128
G13	115695	GWHGEUUU059822	98.701	4.54e-32	137	Oleur061Scf9056g03049	98.701	8.3e-32	137	OE9A024637	100	1.08e-33	143	LOC111365890	100	8.82e-34	143
G13	116650	GWHGEUUU060586	100	5.79e-41	167	Oleur061Scf7200g00009	100	1.06e-40	167	OE9A091592	100	6.39e-41	167	LOC111379817	98.889	2.43e-39	161
G13	117522	GWHGEUUU060756	100	7.59e-30	130	Oleur061Scf3519g02025	100	1.39e-29	130	OE9A008169	97.368	8.38e-30	130	LOC111365232	97.368	6.86e-30	130
G13	118580	GWHGEUUU059902	100	5.79e-41	167	Oleur061Scf3524g01017	100	1.06e-40	167	OE9A037090	100	6.39e-41	167	LOC111383546	98.889	2.43e-39	161
G13	120541	GWHGEUUU060435	100	1.62e-36	152	Oleur061Scf1277g02018	100	2.96e-36	152	OE9A074087	98.78	8.32e-35	147	LOC111366156	100	1.46e-36	152
G13	120822					Oleur061Scf1639g00012	97.531	2.31e-32	139	OE9A090549	97.531	1.39e-32	139	LOC111366027	100	5.27e-36	150
G13	121257	GWHGEUUU060472	98.63	7.59e-30	130	Oleur061Scf1209g03019	100	1.06e-40	167	OE9A040628	98.63	8.38e-30	130	LOC111366176	100	5.23e-41	167
G13	124916	GWHGEUUU059819	96.552	2.71e-34	145	Oleur061Scf9056g02015	96.552	4.96e-34	145	OE9A019214	97.531	1.39e-32	139	LOC111365887	96.552	2.45e-34	145
G13	128032									OE9A024613	98.78	8.32e-35	147
G13	130153	GWHGEUUU059857	97.778	1.25e-37	156	Oleur061Scf2899g02003	98.113	1.82e-18	93.5	OE9A044587	97.778	1.38e-37	156
G13	130305	GWHGEUUU060257	100	2.71e-34	145	Oleur061Scf0073g02010	100	4.96e-34	145	OE9A066080	100	2.99e-34	145	LOC111365786	100	2.45e-34	145
G13	131741
G13	134341	GWHGEUUU060487	97.778	1.25e-37	156	Oleur061Scf0031g06007	98.889	4.92e-39	161	OE9A035441	98.889	2.97e-39	161
G13	144515	GWHGEUUU060548	97.778	1.25e-37	156	Oleur061Scf8342g00012	97.778	2.29e-37	156	OE9A081495	97.778	1.38e-37	156	LOC111369649	97.778	1.13e-37	156
G13	148633									OE9A012434	97.778	1.38e-37	156
G13	149047	GWHGEUUU060435	100	1.62e-36	152	Oleur061Scf1277g02018	100	2.96e-36	152	OE9A074087	98.78	8.32e-35	147	LOC111366156	100	1.46e-36	152
G13	159425	GWHGEUUU060393	100	1.25e-37	156	Oleur061Scf0604g09033	98.81	1.07e-35	150	OE9A104507	100	1.38e-37	156	LOC111366131	98.81	5.27e-36	150
G13	163089	GWHGEUUU059747	98.889	2.69e-39	161	Oleur061Scf7869g07014	98.889	4.92e-39	161	OE9A088288	98.889	2.97e-39	161	LOC111365950	100	5.23e-41	167
G13	163784	GWHGEUUU059858	97.333	2.73e-29	128	Oleur061Scf2899g02030	100	2.31e-32	139	OE9A084686	98.667	6.48e-31	134	LOC111413003	100	1.14e-32	139
G13	171347	GWHGEUUU059649	96.667	5.83e-36	150	Oleur061Scf5030g00003	97.778	2.29e-37	156	OE9A115781	100	6.62e-16	84.2	LOC111391097	98.889	2.43e-39	161
G13	171373	GWHGEUUU060522	97.778	1.25e-37	156	Oleur061Scf9079g01029	97.778	2.29e-37	156	OE9A119397	97.778	1.38e-37	156
G13	173693	GWHGEUUU060533	100	5.79e-41	167	Oleur061Scf2476g00004	100	1.06e-40	167	OE9A104190	98.889	2.97e-39	161	LOC111369570	100	5.23e-41	167
G13	176833	GWHGEUUU060376	98.889	2.69e-39	161	Oleur061Scf0604g08014	97.778	2.29e-37	156	OE9A006398	98.889	2.97e-39	161	LOC111366119	97.778	1.13e-37	156
G13	181099	GWHGEUUU060423	100	5.79e-41	167	Oleur061Scf1277g03003	98.889	4.92e-39	161	OE9A038844	100	6.39e-41	167	LOC111366149	100	5.23e-41	167
